# Supplementary material for: The East Asian gut microbiome is distinct from colocalized White subjects and connected to metabolic health
Source: eLife journal article supplement (doi:10.7554/elife.70349), 2021-10-07
Supplement: supp [file elife-70349-supp-v2.zip]

Archive with 19 entries (19 files):
- elife_poa_e70349_Transparent_Reporting_File.docx
- elife_poa_e70349_Supplementary_file_1.xlsx
- elife_poa_e70349_Figure_1_source_data_1.xlsx
- elife_poa_e70349_Figure_2_source_data_1.xlsx
- elife_poa_e70349_Figure_3_source_data_1.xlsx
- elife_poa_e70349_Figure_4_source_data_1.xlsx
- elife_poa_e70349_Figure_5_source_data_1.xlsx
- elife_poa_e70349_Figure_6_source_data_1.xlsx
- elife_poa_e70349_Figure_7_source_data_1.xlsx
- elife_poa_e70349_Figure_8_source_data_1.xlsx
- elife_poa_e70349_Figure_1_figure_supplement_1.pdf
- elife_poa_e70349_Figure_3_figure_supplement_1.pdf
- elife_poa_e70349_Figure_4_figure_supplement_1.pdf
- elife_poa_e70349_Figure_6_figure_supplement_1.pdf
- elife_poa_e70349_Figure_6_figure_supplement_2.pdf
- elife_poa_e70349_Figure_6_figure_supplement_3.pdf
- elife_poa_e70349_Figure_7_figure_supplement_1.pdf
- elife_poa_e70349_Figure_7_figure_supplement_2.pdf
- elife_poa_e70349_Figure_7_figure_supplement_3.pdf
