# Supplementary material for: The East Asian gut microbiome is distinct from colocalized White subjects and connected to metabolic health
Source: eLife journal article supplement (doi:10.7554/elife.70349), 2021-10-07
Supplement: supp [file elife-70349-supp-v2.zip › elife_poa_e70349_Figure_2_source_data_1.xlsx]

## Sheet: Figure 2A
SampleID	Ethnicity	Axis 1	Axis 2	Axis 3
OB012	EA	-0.0901196	-0.395883	-0.0965182
OB021	EA	-0.0388842	-0.0869691	1.36739e-05
OB022	EA	-0.0921013	-0.0233334	-0.189989
OB024	EA	-0.0516049	0.0174934	-0.12069
OB026	EA	-0.124096	-0.0655729	-0.0168879
OB027	EA	-0.0144055	-0.0836544	0.0570402
OB030	EA	-0.0491991	-0.0565443	-0.0208473
OB035	EA	0.0666509	-0.0480707	-0.0699756
OB040	EA	-0.0882904	-0.00343034	-0.141462
OB041	EA	0.0663976	0.077207	-0.0825998
OB043	EA	0.0186213	0.131649	-0.0899072
OB044	EA	0.134147	0.136566	-0.181416
OB051	EA	-0.000907803	-0.0256008	0.0620677
OB055	EA	-0.0279049	-0.0745164	-0.0238277
OB057	EA	-0.0139112	0.0212532	0.0470275
OB070	EA	-0.0564618	0.0481446	0.0489941
OB072	EA	-0.0920881	0.151214	0.113087
OB078	EA	-0.113549	0.018756	0.119696
OB079	EA	-0.0516772	0.0255103	0.0469074
OB084	EA	-0.105527	0.11406	-0.0673686
OB085	EA	-0.13736	0.107919	0.00329845
OB006	W	-0.0847027	-0.132997	0.025986
OB008	W	-0.0604266	-0.0930737	0.000723772
OB011	W	0.00284023	-0.134304	-0.00863438
OB014	W	-0.0633575	-0.0794741	0.0345214
OB018	W	-0.0358902	0.0494428	-0.0371452
OB020	W	-0.0792594	-0.0735568	-0.0878862
OB028	W	0.00965964	0.104437	0.0170748
OB036	W	0.0866587	-0.040907	0.0311624
OB039	W	-0.0394977	-0.0176541	0.252874
OB042	W	0.0979897	0.215518	-0.0535893
OB045	W	-0.0259494	-0.115419	-0.0660939
OB046	W	0.378318	0.00999135	0.0511249
OB050	W	0.0997329	-0.0222068	0.0153563
OB056	W	0.514087	-0.0154166	-0.167341
OB059	W	-0.0663099	0.147053	-0.0668755
OB063	W	0.0928664	0.00444517	0.175862
OB064	W	-0.00127369	0.0959881	0.0115515
OB066	W	0.267484	-0.129305	0.251871
OB067	W	-0.0621655	-0.0643851	-0.0822381
OB068	W	0.0512962	-0.0216166	0.105123
OB069	W	-0.0926238	0.0350987	-0.019169
OB071	W	-0.144406	0.197568	0.121041
OB081	W	-0.00126422	0.0307131	0.0624931
OB082	W	0.0184653	0.0638637	0.0355642

## Sheet: Figure 2B
Metric	Class	p-value	Variance explained (R2)
Ethnicity	Demographic	0.00239976	0.0465412
HOMA-IR	Laboratory	0.0415958	0.0411857
BMI	Metabolic	0.0224978	0.0398927
Statin	Lifestyle	0.0346965	0.0380482
Fiber	Lifestyle	0.0794921	0.0368088
FPG	Laboratory	0.0930907	0.0366526
Alcohol	Lifestyle	0.0757924	0.0359321
Carbohydrate	Lifestyle	0.0908909	0.0355236
Energy intake	Lifestyle	0.131387	0.0351072
Fat	Lifestyle	0.119888	0.0320703
Insulin	Laboratory	0.114689	0.0317665
Diabetes	Metabolic	0.106689	0.031556
Metformin	Lifestyle	0.153185	0.0301991
Protein	Lifestyle	0.273373	0.0267089
Age	Demographic	0.314769	0.0254206
Sex	Demographic	0.507749	0.0219159
Triglycerides	Laboratory	0.486351	0.0190404
Cholesterol	Laboratory	0.793521	0.0163029
US born	Demographic	0.942906	0.013607

## Sheet: Figure 2C
Phylum	Species	p-value	EA (Average CLR abundance)	W (Average CLR abundance)	Difference in CLR	Direction
Verrucomicrobia	Akkermansia_muciniphila	0.00703487	2.91889	4.29848	-1.3796	Higher W
Firmicutes	Roseburia_hominis	0.00949092	1.37781	2.61573	-1.23792	Higher W
Firmicutes	Ruminococcus_gnavus	0.0452031	3.15746	1.89315	1.26431	Higher EA
Bacteroidetes	Bacteroidales_bacterium_ph8	0.0454853	-2.2498	-0.282104	-1.96769	Higher W
Bacteroidetes	Bacteroides_xylanisolvens	0.0606227	-0.452285	-1.45949	1.0072	Higher EA
Bacteroidetes	Bacteroides_salyersiae	0.0871727	-2.22857	-3.62665	1.39808	Higher EA
Firmicutes	Ruminococcaceae_bacterium_D16	0.120191	-1.29917	-2.12828	0.829111	Higher EA
Firmicutes	Lachnospiraceae_bacterium_7_1_58FAA	0.122048	-0.773429	-0.130016	-0.643413	Higher W
Firmicutes	Clostridium_symbiosum	0.122917	-2.32826	-3.60086	1.2726	Higher EA
Firmicutes	Flavonifractor_plautii	0.127916	-2.3834	-4.69929	2.31589	Higher EA
Firmicutes	Coprobacillus_unclassified	0.141987	-0.690027	-2.13116	1.44113	Higher EA
Firmicutes	Eubacterium_hallii	0.160704	3.72946	4.62726	-0.897798	Higher W
Actinobacteria	Adlercreutzia_equolifaciens	0.174019	0.0667026	0.860944	-0.794241	Higher W
Firmicutes	Ruminococcus_lactaris	0.185962	1.6384	1.88737	-0.24897	Higher W
Firmicutes	Dialister_invisus	0.200211	2.39766	3.33351	-0.935853	Higher W
Bacteroidetes	Bacteroides_cellulosilyticus	0.204715	1.81044	2.26583	-0.455394	Higher W
Bacteroidetes	Bacteroides_faecis	0.218951	-0.926533	-1.19995	0.273419	Higher EA
Firmicutes	Eubacterium_sp_3_1_31	0.244227	-2.48654	-2.50603	0.0194952	Higher EA
Actinobacteria	Bifidobacterium_adolescentis	0.256922	5.1139	5.62503	-0.511125	Higher W
Bacteroidetes	Barnesiella_intestinihominis	0.258078	0.71167	0.727991	-0.0163204	Higher W
Firmicutes	Eubacterium_rectale	0.264091	7.63781	7.54208	0.095731	Higher EA
Firmicutes	Eubacterium_siraeum	0.267393	0.657976	1.22217	-0.564192	Higher W
Firmicutes	Clostridium_bolteae	0.268064	-0.71543	-1.84305	1.12762	Higher EA
Bacteroidetes	Parabacteroides_merdae	0.268744	1.18615	0.288251	0.8979	Higher EA
Bacteroidetes	Bacteroides_vulgatus	0.270442	3.58762	3.2854	0.302224	Higher EA
Firmicutes	Eubacterium_biforme	0.27801	0.738123	1.88062	-1.1425	Higher W
Bacteroidetes	Bacteroides_massiliensis	0.285277	0.567845	-0.4915	1.05935	Higher EA
Firmicutes	Lachnospiraceae_bacterium_5_1_63FAA	0.287955	1.11016	1.64468	-0.534524	Higher W
Proteobacteria	Escherichia_unclassified	0.306157	0.120462	-0.0231764	0.143638	Higher EA
Firmicutes	Coprococcus_comes	0.317551	2.66105	3.49247	-0.83142	Higher W
Firmicutes	Coprococcus_catus	0.322386	1.7698	2.25446	-0.484663	Higher W
Bacteroidetes	Prevotella_copri	0.330168	3.10917	3.36219	-0.253015	Higher W
Bacteroidetes	Alistipes_onderdonkii	0.332235	1.70978	1.48605	0.223732	Higher EA
Bacteroidetes	Bacteroides_coprocola	0.334378	-1.29975	-3.29526	1.99551	Higher EA
Firmicutes	Streptococcus_thermophilus	0.340367	1.30984	1.89804	-0.588195	Higher W
Firmicutes	Megamonas_unclassified	0.347115	0.141781	1.06281	-0.921026	Higher W
Bacteroidetes	Parabacteroides_johnsonii	0.352538	-3.17214	-6.22658	3.05445	Higher EA
Firmicutes	Ruminococcus_bromii	0.362095	4.76982	4.82368	-0.0538609	Higher W
Firmicutes	Blautia_hydrogenotrophica	0.383786	-3.40876	-3.01671	-0.392051	Higher W
Firmicutes	Clostridium_nexile	0.387689	-1.6926	-2.459	0.766396	Higher EA
Bacteroidetes	Bacteroides_stercoris	0.391718	2.76816	3.29832	-0.530156	Higher W
Firmicutes	Megamonas_funiformis	0.399385	-2.17005	-4.08795	1.9179	Higher EA
Firmicutes	Ruminococcus_torques	0.400507	4.56564	4.83493	-0.269296	Higher W
Firmicutes	Ruminococcus_obeum	0.412481	4.25966	4.79197	-0.532311	Higher W
Firmicutes	Oscillibacter_unclassified	0.418087	1.95818	2.00496	-0.0467757	Higher W
Firmicutes	Lactobacillus_reuteri	0.419349	-0.406247	-0.861427	0.45518	Higher EA
Firmicutes	Lachnospiraceae_bacterium_1_1_57FAA	0.42015	1.04881	0.309237	0.739568	Higher EA
Firmicutes	Catenibacterium_mitsuokai	0.422206	0.319431	1.09059	-0.771162	Higher W
Actinobacteria	Bifidobacterium_longum	0.429189	4.90218	5.35532	-0.453141	Higher W
Firmicutes	Enterococcus_faecium	0.437995	-6.13531	-5.32668	-0.808635	Higher W
Firmicutes	Anaerostipes_unclassified	0.443816	-1.73546	-6.58977	4.85431	Higher EA
Bacteroidetes	Alistipes_indistinctus	0.446802	-7.01349	-5.60403	-1.40947	Higher W
Actinobacteria	Gordonibacter_pamelaeae	0.450153	-0.999256	-1.48847	0.489217	Higher EA
Firmicutes	Veillonella_unclassified	0.453203	-2.2631	-2.46279	0.199688	Higher EA
Bacteroidetes	Alistipes_putredinis	0.46402	2.98308	3.76043	-0.777346	Higher W
Bacteroidetes	Bacteroides_ovatus	0.46642	3.3638	2.42937	0.934435	Higher EA
Firmicutes	Roseburia_inulinivorans	0.468986	2.15021	2.52544	-0.375232	Higher W
Proteobacteria	Sutterella_wadsworthensis	0.482935	-4.2185	-2.81615	-1.40235	Higher W
Firmicutes	Acidaminococcus_unclassified	0.494139	-3.72853	-1.49777	-2.23077	Higher W
Firmicutes	Streptococcus_parasanguinis	0.499573	0.79686	1.12775	-0.33089	Higher W
Bacteroidetes	Bacteroides_fragilis	0.513955	-1.03597	-0.278723	-0.757243	Higher W
Firmicutes	Streptococcus_salivarius	0.513995	3.12753	3.64566	-0.518126	Higher W
Firmicutes	Acidaminococcus_intestini	0.521301	-8.70927	-8.23771	-0.471564	Higher W
Bacteroidetes	Bacteroides_finegoldii	0.52727	-1.16899	-1.0883	-0.0806852	Higher W
Firmicutes	Streptococcus_vestibularis	0.533859	-4.24914	-6.71208	2.46294	Higher EA
Firmicutes	Lactobacillus_salivarius	0.539854	-3.11651	-5.18965	2.07314	Higher EA
Actinobacteria	Bifidobacterium_animalis	0.541032	-2.41837	-2.38927	-0.0290979	Higher W
Firmicutes	Dorea_longicatena	0.542442	4.48734	4.25815	0.229191	Higher EA
Bacteroidetes	Bacteroides_thetaiotaomicron	0.542934	2.16509	1.35784	0.807251	Higher EA
Bacteroidetes	Bacteroides_intestinalis	0.55187	-2.81655	-2.47395	-0.3426	Higher W
Firmicutes	Eubacterium_eligens	0.584232	1.22315	1.67308	-0.449931	Higher W
Firmicutes	Megamonas_rupellensis	0.590986	-7.85786	-7.70752	-0.150346	Higher W
Bacteroidetes	Alistipes_finegoldii	0.599059	-1.52225	-1.23929	-0.282952	Higher W
Firmicutes	Lachnospiraceae_bacterium_3_1_46FAA	0.603865	0.300726	0.885078	-0.584352	Higher W
Bacteroidetes	Prevotella_stercorea	0.611861	-3.34664	-3.90035	0.553708	Higher EA
Bacteroidetes	Parabacteroides_distasonis	0.632825	0.255541	0.66492	-0.409379	Higher W
Bacteroidetes	Bacteroides_dorei	0.635879	2.12384	2.91116	-0.78732	Higher W
Firmicutes	Subdoligranulum_unclassified	0.651687	6.06664	6.90801	-0.841369	Higher W
Bacteroidetes	Bacteroides_caccae	0.655429	1.83654	1.87716	-0.0406217	Higher W
Firmicutes	Eubacterium_ramulus	0.660692	1.82087	2.44802	-0.627147	Higher W
Firmicutes	Clostridium_leptum	0.665406	0.666904	0.702916	-0.0360123	Higher W
Firmicutes	Lachnospiraceae_bacterium_3_1_57FAA_CT1	0.671786	-5.08239	-4.48997	-0.592414	Higher W
Firmicutes	Megamonas_hypermegale	0.681073	-5.59787	-4.89889	-0.698986	Higher W
Bacteroidetes	Paraprevotella_xylaniphila	0.682833	-6.42634	-6.19979	-0.226559	Higher W
Firmicutes	Lactobacillus_ruminis	0.68839	0.172498	-0.180766	0.353264	Higher EA
Bacteroidetes	Bacteroides_eggerthii	0.689955	-2.30632	-2.83579	0.52947	Higher EA
Bacteroidetes	Bacteroides_coprophilus	0.69207	-5.6235	-5.35547	-0.268034	Higher W
Proteobacteria	Bilophila_unclassified	0.698185	1.53765	1.49459	0.0430686	Higher EA
Bacteroidetes	Paraprevotella_unclassified	0.703436	-0.101898	0.132409	-0.234307	Higher W
Firmicutes	Lactobacillus_oris	0.713432	-3.32903	-4.89113	1.5621	Higher EA
Firmicutes	Erysipelotrichaceae_bacterium_6_1_45	0.715861	-3.6307	-4.04117	0.410471	Higher EA
Proteobacteria	Escherichia_coli	0.720987	2.14291	2.01778	0.125127	Higher EA
Actinobacteria	Bifidobacterium_bifidum	0.7229	2.63361	3.53093	-0.897324	Higher W
Bacteroidetes	Paraprevotella_clara	0.734695	-2.84515	-2.95047	0.105315	Higher EA
Bacteroidetes	Bacteroides_uniformis	0.746707	3.74066	3.98425	-0.243591	Higher W
Firmicutes	Dorea_formicigenerans	0.756334	3.60868	3.87478	-0.266095	Higher W
Actinobacteria	Eggerthella_lenta	0.756689	-0.934767	-0.352889	-0.581878	Higher W
Bacteroidetes	Bacteroides_plebeius	0.758049	-0.563442	-0.456704	-0.106738	Higher W
Bacteroidetes	Alistipes_shahii	0.759069	0.798952	0.742222	0.0567296	Higher EA
Firmicutes	Ruminococcus_callidus	0.759934	-0.319777	0.224919	-0.544696	Higher W
Actinobacteria	Bifidobacterium_catenulatum	0.786002	-0.815658	-0.885688	0.0700295	Higher EA
Firmicutes	Phascolarctobacterium_succinatutens	0.786109	0.55074	0.260225	0.290515	Higher EA
Firmicutes	Faecalibacterium_prausnitzii	0.793187	6.96498	7.30162	-0.336636	Higher W
Firmicutes	Ruminococcus_sp_5_1_39BFAA	0.798292	5.39546	5.64728	-0.251812	Higher W
Firmicutes	Eubacterium_ventriosum	0.801179	0.0687741	0.541528	-0.472754	Higher W
Firmicutes	Anaerostipes_hadrus	0.816961	0.287863	0.875863	-0.588	Higher W
Firmicutes	Roseburia_intestinalis	0.830203	1.38495	2.20529	-0.820341	Higher W
Actinobacteria	Bifidobacterium_pseudocatenulatum	0.833102	2.85393	2.84927	0.00466636	Higher EA
Actinobacteria	Eggerthella_unclassified	0.869015	2.34078	2.04383	0.296947	Higher EA
Actinobacteria	Collinsella_aerofaciens	0.897118	5.65817	6.07096	-0.412786	Higher W

## Sheet: Figure 2D
Kingdom	Phylum	Class	Order	Family	Genus	p-value	Log2 fold difference (EA/W)
Bacteria	Verrucomicrobia	Verrucomicrobiae	Verrucomicrobiales	Verrucomicrobiaceae	Akkermansia	0.0131963	-1.20127
Bacteria	Firmicutes	Erysipelotrichia	Erysipelotrichales	Erysipelotrichaceae	Erysipelotrichaceae_noname	0.0462354	-0.991289
Bacteria	Bacteroidetes	Bacteroidia	Bacteroidales	Bacteroidales_noname	Bacteroidales_noname	0.0751819	-1.93275
Bacteria	Firmicutes	Clostridia	Clostridiales	Ruminococcaceae	Ruminococcaceae_noname	0.0941879	1.26711
Bacteria	Firmicutes	Clostridia	Clostridiales	Clostridiales_noname	Flavonifractor	0.109785	2.23033
Bacteria	Firmicutes	Erysipelotrichia	Erysipelotrichales	Erysipelotrichaceae	Coprobacillus	0.125331	1.86623
Bacteria	Firmicutes	Negativicutes	Selenomonadales	Veillonellaceae	Dialister	0.177005	-1.30869
Bacteria	Bacteroidetes	Bacteroidia	Bacteroidales	Prevotellaceae	Prevotella	0.247882	0.36098
Bacteria	Actinobacteria	Actinobacteria	Coriobacteriales	Coriobacteriaceae	Adlercreutzia	0.282245	-0.747723
Bacteria	Bacteroidetes	Bacteroidia	Bacteroidales	Porphyromonadaceae	Parabacteroides	0.293219	-0.203341
Bacteria	Firmicutes	Clostridia	Clostridiales	Ruminococcaceae	Ruminococcus	0.293274	0.264088
Bacteria	Bacteroidetes	Bacteroidia	Bacteroidales	Bacteroidaceae	Bacteroides	0.317053	0.249618
Bacteria	Actinobacteria	Actinobacteria	Coriobacteriales	Coriobacteriaceae	Gordonibacter	0.345233	0.93171
Bacteria	Bacteroidetes	Bacteroidia	Bacteroidales	Porphyromonadaceae	Barnesiella	0.369788	-0.639105
Bacteria	Firmicutes	Clostridia	Clostridiales	Lachnospiraceae	Coprococcus	0.371657	-0.601752
Bacteria	Firmicutes	Clostridia	Clostridiales	Eubacteriaceae	Eubacterium	0.382657	0.0551826
Bacteria	Firmicutes	Bacilli	Lactobacillales	Lactobacillaceae	Lactobacillus	0.393984	0.364641
Bacteria	Firmicutes	Clostridia	Clostridiales	Lachnospiraceae	Dorea	0.430658	-0.0487557
Bacteria	Firmicutes	Negativicutes	Selenomonadales	Veillonellaceae	Veillonella	0.433365	0.296448
Bacteria	Firmicutes	Negativicutes	Selenomonadales	Veillonellaceae	Megamonas	0.436947	-0.983625
Bacteria	Firmicutes	Bacilli	Lactobacillales	Streptococcaceae	Streptococcus	0.450636	0.238556
Bacteria	Firmicutes	Clostridia	Clostridiales	Lachnospiraceae	Lachnospiraceae_noname	0.454221	0.12736
Archaea	Euryarchaeota	Methanobacteria	Methanobacteriales	Methanobacteriaceae	Methanobrevibacter	0.472166	-0.822454
Bacteria	Firmicutes	Erysipelotrichia	Erysipelotrichales	Erysipelotrichaceae	Catenibacterium	0.497941	-0.738994
Bacteria	Firmicutes	Clostridia	Clostridiales	Ruminococcaceae	Faecalibacterium	0.527818	-0.0256172
Bacteria	Proteobacteria	Deltaproteobacteria	Desulfovibrionales	Desulfovibrionaceae	Bilophila	0.53118	0.201195
Bacteria	Firmicutes	Clostridia	Clostridiales	Oscillospiraceae	Oscillibacter	0.538049	-0.123911
Bacteria	Proteobacteria	Betaproteobacteria	Burkholderiales	Sutterellaceae	Sutterella	0.540959	-0.63975
Bacteria	Proteobacteria	Gammaproteobacteria	Enterobacteriales	Enterobacteriaceae	Escherichia	0.559475	0.275691
Bacteria	Firmicutes	Bacilli	Lactobacillales	Enterococcaceae	Enterococcus	0.55959	-0.439181
Bacteria	Firmicutes	Negativicutes	Selenomonadales	Acidaminococcaceae	Acidaminococcus	0.629592	0.240456
Bacteria	Firmicutes	Clostridia	Clostridiales	Lachnospiraceae	Blautia	0.67525	0.219361
Bacteria	Proteobacteria	Betaproteobacteria	Burkholderiales	Sutterellaceae	Sutterellaceae_unclassified	0.679686	0.256068
Bacteria	Firmicutes	Clostridia	Clostridiales	Lachnospiraceae	Anaerostipes	0.680574	-0.0576311
Bacteria	Firmicutes	Clostridia	Clostridiales	Clostridiaceae	Clostridium	0.713187	0.121605
Bacteria	Firmicutes	Clostridia	Clostridiales	Lachnospiraceae	Roseburia	0.744757	-0.216453
Bacteria	Bacteroidetes	Bacteroidia	Bacteroidales	Prevotellaceae	Paraprevotella	0.760805	-0.390114
Bacteria	Actinobacteria	Actinobacteria	Coriobacteriales	Coriobacteriaceae	Eggerthella	0.763819	0.17971
Bacteria	Actinobacteria	Actinobacteria	Bifidobacteriales	Bifidobacteriaceae	Bifidobacterium	0.776982	-0.0301414
Bacteria	Actinobacteria	Actinobacteria	Coriobacteriales	Coriobacteriaceae	Collinsella	0.781822	0.063297
Bacteria	Firmicutes	Negativicutes	Selenomonadales	Acidaminococcaceae	Phascolarctobacterium	0.792416	0.275507
Bacteria	Bacteroidetes	Bacteroidia	Bacteroidales	Rikenellaceae	Alistipes	0.801847	0.0947535
Bacteria	Firmicutes	Clostridia	Clostridiales	Ruminococcaceae	Subdoligranulum	0.825348	-0.530627

## Sheet: Figure 2E
Kingdom	Phylum	Class	Order	Famiy	Genus	Species	p-value	Log2 fold difference (EA/W)
Bacteria	Verrucomicrobia	Verrucomicrobiae	Verrucomicrobiales	Verrucomicrobiaceae	Akkermansia	Akkermansia_muciniphila	0.00703487	-1.48852
Bacteria	Firmicutes	Clostridia	Clostridiales	Lachnospiraceae	Roseburia	Roseburia_hominis	0.00949092	-1.32032
Bacteria	Firmicutes	Clostridia	Clostridiales	Lachnospiraceae	Blautia	Ruminococcus_gnavus	0.0452031	1.5474
Bacteria	Bacteroidetes	Bacteroidia	Bacteroidales	Bacteroidales_noname	Bacteroidales_noname	Bacteroidales_bacterium_ph8	0.0454853	-2.32308
Bacteria	Bacteroidetes	Bacteroidia	Bacteroidales	Bacteroidaceae	Bacteroides	Bacteroides_xylanisolvens	0.0606227	1.27477
Bacteria	Bacteroidetes	Bacteroidia	Bacteroidales	Bacteroidaceae	Bacteroides	Bacteroides_salyersiae	0.0871727	2.00978
Bacteria	Firmicutes	Clostridia	Clostridiales	Ruminococcaceae	Ruminococcaceae_noname	Ruminococcaceae_bacterium_D16	0.120191	1.19369
Bacteria	Firmicutes	Clostridia	Clostridiales	Lachnospiraceae	Lachnospiraceae_noname	Lachnospiraceae_bacterium_7_1_58FAA	0.122048	-0.777348
Bacteria	Firmicutes	Clostridia	Clostridiales	Clostridiaceae	Clostridium	Clostridium_symbiosum	0.122917	1.59433
Bacteria	Firmicutes	Clostridia	Clostridiales	Clostridiales_noname	Flavonifractor	Flavonifractor_plautii	0.127916	2.12119
Bacteria	Firmicutes	Erysipelotrichia	Erysipelotrichales	Erysipelotrichaceae	Coprobacillus	Coprobacillus_unclassified	0.141987	1.78975
Bacteria	Firmicutes	Clostridia	Clostridiales	Eubacteriaceae	Eubacterium	Eubacterium_hallii	0.160704	-0.648238
Bacteria	Actinobacteria	Actinobacteria	Coriobacteriales	Coriobacteriaceae	Adlercreutzia	Adlercreutzia_equolifaciens	0.174019	-0.921898
Bacteria	Firmicutes	Clostridia	Clostridiales	Ruminococcaceae	Ruminococcus	Ruminococcus_lactaris	0.185962	-0.921026
Bacteria	Firmicutes	Negativicutes	Selenomonadales	Veillonellaceae	Dialister	Dialister_invisus	0.200211	-1.20932
Bacteria	Bacteroidetes	Bacteroidia	Bacteroidales	Bacteroidaceae	Bacteroides	Bacteroides_cellulosilyticus	0.204715	-0.542043
Bacteria	Bacteroidetes	Bacteroidia	Bacteroidales	Bacteroidaceae	Bacteroides	Bacteroides_faecis	0.218951	0.546411
Bacteria	Firmicutes	Clostridia	Clostridiales	Eubacteriaceae	Eubacterium	Eubacterium_sp_3_1_31	0.244227	0.994895
Bacteria	Actinobacteria	Actinobacteria	Bifidobacteriales	Bifidobacteriaceae	Bifidobacterium	Bifidobacterium_adolescentis	0.256922	-0.725157
Bacteria	Bacteroidetes	Bacteroidia	Bacteroidales	Porphyromonadaceae	Barnesiella	Barnesiella_intestinihominis	0.258078	-0.683537
Bacteria	Firmicutes	Clostridia	Clostridiales	Eubacteriaceae	Eubacterium	Eubacterium_rectale	0.264091	0.264956
Bacteria	Firmicutes	Clostridia	Clostridiales	Eubacteriaceae	Eubacterium	Eubacterium_siraeum	0.267393	-0.72835
Bacteria	Firmicutes	Clostridia	Clostridiales	Clostridiaceae	Clostridium	Clostridium_bolteae	0.268064	0.926179
Bacteria	Bacteroidetes	Bacteroidia	Bacteroidales	Porphyromonadaceae	Parabacteroides	Parabacteroides_merdae	0.268744	0.854951
Bacteria	Bacteroidetes	Bacteroidia	Bacteroidales	Bacteroidaceae	Bacteroides	Bacteroides_vulgatus	0.270442	0.399955
Bacteria	Firmicutes	Erysipelotrichia	Erysipelotrichales	Erysipelotrichaceae	Erysipelotrichaceae_noname	Eubacterium_biforme	0.27801	-1.00591
Bacteria	Bacteroidetes	Bacteroidia	Bacteroidales	Bacteroidaceae	Bacteroides	Bacteroides_massiliensis	0.285277	0.78604
Bacteria	Firmicutes	Clostridia	Clostridiales	Lachnospiraceae	Lachnospiraceae_noname	Lachnospiraceae_bacterium_5_1_63FAA	0.287955	-0.482425
Bacteria	Proteobacteria	Gammaproteobacteria	Enterobacteriales	Enterobacteriaceae	Escherichia	Escherichia_unclassified	0.306157	1.35209
Bacteria	Firmicutes	Clostridia	Clostridiales	Lachnospiraceae	Coprococcus	Coprococcus_comes	0.317551	-0.732645
Bacteria	Firmicutes	Clostridia	Clostridiales	Lachnospiraceae	Coprococcus	Coprococcus_catus	0.322386	-0.583631
Bacteria	Bacteroidetes	Bacteroidia	Bacteroidales	Prevotellaceae	Prevotella	Prevotella_copri	0.330168	0.218305
Bacteria	Bacteroidetes	Bacteroidia	Bacteroidales	Rikenellaceae	Alistipes	Alistipes_onderdonkii	0.332235	0.832363
Bacteria	Bacteroidetes	Bacteroidia	Bacteroidales	Bacteroidaceae	Bacteroides	Bacteroides_coprocola	0.334378	1.43314
Bacteria	Firmicutes	Bacilli	Lactobacillales	Streptococcaceae	Streptococcus	Streptococcus_thermophilus	0.340367	-1.00416
Bacteria	Firmicutes	Negativicutes	Selenomonadales	Veillonellaceae	Megamonas	Megamonas_unclassified	0.347115	-0.755572
Bacteria	Bacteroidetes	Bacteroidia	Bacteroidales	Porphyromonadaceae	Parabacteroides	Parabacteroides_johnsonii	0.352538	1.34151
Bacteria	Firmicutes	Clostridia	Clostridiales	Ruminococcaceae	Ruminococcus	Ruminococcus_bromii	0.362095	-0.0407172
Bacteria	Firmicutes	Clostridia	Clostridiales	Lachnospiraceae	Blautia	Blautia_hydrogenotrophica	0.383786	-1.10926
Bacteria	Firmicutes	Clostridia	Clostridiales	Clostridiaceae	Clostridium	Clostridium_nexile	0.387689	0.841886
Bacteria	Bacteroidetes	Bacteroidia	Bacteroidales	Bacteroidaceae	Bacteroides	Bacteroides_stercoris	0.391718	0.0755593
Archaea	Euryarchaeota	Methanobacteria	Methanobacteriales	Methanobacteriaceae	Methanobrevibacter	Methanobrevibacter_smithii	0.397023	-0.859729
Bacteria	Firmicutes	Negativicutes	Selenomonadales	Veillonellaceae	Megamonas	Megamonas_funiformis	0.399385	1.3426
Bacteria	Firmicutes	Clostridia	Clostridiales	Lachnospiraceae	Blautia	Ruminococcus_torques	0.400507	-0.237179
Bacteria	Firmicutes	Clostridia	Clostridiales	Lachnospiraceae	Blautia	Ruminococcus_obeum	0.412481	-0.240376
Bacteria	Firmicutes	Clostridia	Clostridiales	Oscillospiraceae	Oscillibacter	Oscillibacter_unclassified	0.418087	-0.363891
Bacteria	Firmicutes	Bacilli	Lactobacillales	Lactobacillaceae	Lactobacillus	Lactobacillus_reuteri	0.419349	1.07068
Bacteria	Firmicutes	Clostridia	Clostridiales	Lachnospiraceae	Lachnospiraceae_noname	Lachnospiraceae_bacterium_1_1_57FAA	0.42015	0.932062
Bacteria	Firmicutes	Erysipelotrichia	Erysipelotrichales	Erysipelotrichaceae	Catenibacterium	Catenibacterium_mitsuokai	0.422206	-1.02618
Archaea	Euryarchaeota	Methanobacteria	Methanobacteriales	Methanobacteriaceae	Methanobrevibacter	Methanobrevibacter_unclassified	0.429048	-1.20596
Bacteria	Actinobacteria	Actinobacteria	Bifidobacteriales	Bifidobacteriaceae	Bifidobacterium	Bifidobacterium_longum	0.429189	0.182333
Bacteria	Firmicutes	Bacilli	Lactobacillales	Enterococcaceae	Enterococcus	Enterococcus_faecium	0.437995	-0.803706
Bacteria	Firmicutes	Clostridia	Clostridiales	Lachnospiraceae	Anaerostipes	Anaerostipes_unclassified	0.443816	1.97313
Bacteria	Bacteroidetes	Bacteroidia	Bacteroidales	Rikenellaceae	Alistipes	Alistipes_indistinctus	0.446802	-1.41365
Bacteria	Actinobacteria	Actinobacteria	Coriobacteriales	Coriobacteriaceae	Gordonibacter	Gordonibacter_pamelaeae	0.450153	0.6631
Bacteria	Firmicutes	Negativicutes	Selenomonadales	Veillonellaceae	Veillonella	Veillonella_unclassified	0.453203	0.520526
Bacteria	Bacteroidetes	Bacteroidia	Bacteroidales	Rikenellaceae	Alistipes	Alistipes_putredinis	0.46402	-0.306707
Bacteria	Bacteroidetes	Bacteroidia	Bacteroidales	Bacteroidaceae	Bacteroides	Bacteroides_ovatus	0.46642	0.503459
Bacteria	Firmicutes	Clostridia	Clostridiales	Lachnospiraceae	Roseburia	Roseburia_inulinivorans	0.468986	-0.505084
Bacteria	Proteobacteria	Betaproteobacteria	Burkholderiales	Sutterellaceae	Sutterella	Sutterella_wadsworthensis	0.482935	-0.862533
Bacteria	Firmicutes	Negativicutes	Selenomonadales	Acidaminococcaceae	Acidaminococcus	Acidaminococcus_unclassified	0.494139	-1.01087
Bacteria	Firmicutes	Bacilli	Lactobacillales	Streptococcaceae	Streptococcus	Streptococcus_parasanguinis	0.499573	-0.0895094
Bacteria	Bacteroidetes	Bacteroidia	Bacteroidales	Bacteroidaceae	Bacteroides	Bacteroides_fragilis	0.513955	-0.85561
Bacteria	Firmicutes	Bacilli	Lactobacillales	Streptococcaceae	Streptococcus	Streptococcus_salivarius	0.513995	0.205864
Bacteria	Firmicutes	Negativicutes	Selenomonadales	Acidaminococcaceae	Acidaminococcus	Acidaminococcus_intestini	0.521301	-0.681941
Bacteria	Bacteroidetes	Bacteroidia	Bacteroidales	Bacteroidaceae	Bacteroides	Bacteroides_finegoldii	0.52727	0.216036
Bacteria	Firmicutes	Bacilli	Lactobacillales	Streptococcaceae	Streptococcus	Streptococcus_vestibularis	0.533859	0.982015
Bacteria	Firmicutes	Bacilli	Lactobacillales	Lactobacillaceae	Lactobacillus	Lactobacillus_salivarius	0.539854	0.714983
Bacteria	Actinobacteria	Actinobacteria	Bifidobacteriales	Bifidobacteriaceae	Bifidobacterium	Bifidobacterium_animalis	0.541032	-0.676648
Bacteria	Firmicutes	Clostridia	Clostridiales	Lachnospiraceae	Dorea	Dorea_longicatena	0.542442	-0.031293
Bacteria	Bacteroidetes	Bacteroidia	Bacteroidales	Bacteroidaceae	Bacteroides	Bacteroides_thetaiotaomicron	0.542934	0.5377
Bacteria	Bacteroidetes	Bacteroidia	Bacteroidales	Bacteroidaceae	Bacteroides	Bacteroides_intestinalis	0.55187	-0.717183
Bacteria	Firmicutes	Clostridia	Clostridiales	Eubacteriaceae	Eubacterium	Eubacterium_eligens	0.584232	-0.352794
Bacteria	Firmicutes	Negativicutes	Selenomonadales	Veillonellaceae	Megamonas	Megamonas_rupellensis	0.590986	-0.0254431
Bacteria	Bacteroidetes	Bacteroidia	Bacteroidales	Rikenellaceae	Alistipes	Alistipes_finegoldii	0.599059	-0.24092
Bacteria	Firmicutes	Clostridia	Clostridiales	Lachnospiraceae	Lachnospiraceae_noname	Lachnospiraceae_bacterium_3_1_46FAA	0.603865	-0.411264
Bacteria	Bacteroidetes	Bacteroidia	Bacteroidales	Prevotellaceae	Prevotella	Prevotella_stercorea	0.611861	-0.146182
Bacteria	Bacteroidetes	Bacteroidia	Bacteroidales	Porphyromonadaceae	Parabacteroides	Parabacteroides_distasonis	0.632825	-0.185792
Bacteria	Bacteroidetes	Bacteroidia	Bacteroidales	Bacteroidaceae	Bacteroides	Bacteroides_dorei	0.635879	-0.676521
Bacteria	Firmicutes	Clostridia	Clostridiales	Ruminococcaceae	Subdoligranulum	Subdoligranulum_unclassified	0.651687	-0.561066
Bacteria	Bacteroidetes	Bacteroidia	Bacteroidales	Bacteroidaceae	Bacteroides	Bacteroides_caccae	0.655429	0.0803157
Bacteria	Firmicutes	Clostridia	Clostridiales	Eubacteriaceae	Eubacterium	Eubacterium_ramulus	0.660692	-0.469133
Bacteria	Firmicutes	Clostridia	Clostridiales	Clostridiaceae	Clostridium	Clostridium_leptum	0.665406	-0.189992
Bacteria	Firmicutes	Clostridia	Clostridiales	Lachnospiraceae	Lachnospiraceae_noname	Lachnospiraceae_bacterium_3_1_57FAA_CT1	0.671786	-0.136362
Bacteria	Firmicutes	Negativicutes	Selenomonadales	Veillonellaceae	Megamonas	Megamonas_hypermegale	0.681073	-0.604015
Bacteria	Bacteroidetes	Bacteroidia	Bacteroidales	Prevotellaceae	Paraprevotella	Paraprevotella_xylaniphila	0.682833	-0.0768019
Bacteria	Firmicutes	Bacilli	Lactobacillales	Lactobacillaceae	Lactobacillus	Lactobacillus_ruminis	0.68839	0.194677
Bacteria	Bacteroidetes	Bacteroidia	Bacteroidales	Bacteroidaceae	Bacteroides	Bacteroides_eggerthii	0.689955	-0.10008
Bacteria	Bacteroidetes	Bacteroidia	Bacteroidales	Bacteroidaceae	Bacteroides	Bacteroides_coprophilus	0.69207	-0.563806
Bacteria	Proteobacteria	Deltaproteobacteria	Desulfovibrionales	Desulfovibrionaceae	Bilophila	Bilophila_unclassified	0.698185	0.0243602
Bacteria	Bacteroidetes	Bacteroidia	Bacteroidales	Prevotellaceae	Paraprevotella	Paraprevotella_unclassified	0.703436	-0.249863
Bacteria	Firmicutes	Bacilli	Lactobacillales	Lactobacillaceae	Lactobacillus	Lactobacillus_oris	0.713432	0.0550572
Bacteria	Firmicutes	Erysipelotrichia	Erysipelotrichales	Erysipelotrichaceae	Erysipelotrichaceae_noname	Erysipelotrichaceae_bacterium_6_1_45	0.715861	0.156625
Bacteria	Proteobacteria	Gammaproteobacteria	Enterobacteriales	Enterobacteriaceae	Escherichia	Escherichia_coli	0.720987	0.145245
Bacteria	Actinobacteria	Actinobacteria	Bifidobacteriales	Bifidobacteriaceae	Bifidobacterium	Bifidobacterium_bifidum	0.7229	-0.798466
Bacteria	Bacteroidetes	Bacteroidia	Bacteroidales	Prevotellaceae	Paraprevotella	Paraprevotella_clara	0.734695	0.0132278
Bacteria	Bacteroidetes	Bacteroidia	Bacteroidales	Bacteroidaceae	Bacteroides	Bacteroides_uniformis	0.746707	-0.0248548
Bacteria	Firmicutes	Clostridia	Clostridiales	Lachnospiraceae	Dorea	Dorea_formicigenerans	0.756334	-0.296376
Bacteria	Actinobacteria	Actinobacteria	Coriobacteriales	Coriobacteriaceae	Eggerthella	Eggerthella_lenta	0.756689	-0.355824
Bacteria	Bacteroidetes	Bacteroidia	Bacteroidales	Bacteroidaceae	Bacteroides	Bacteroides_plebeius	0.758049	-0.219361
Bacteria	Bacteroidetes	Bacteroidia	Bacteroidales	Rikenellaceae	Alistipes	Alistipes_shahii	0.759069	0.0319946
Bacteria	Firmicutes	Clostridia	Clostridiales	Ruminococcaceae	Ruminococcus	Ruminococcus_callidus	0.759934	-0.257744
Bacteria	Actinobacteria	Actinobacteria	Bifidobacteriales	Bifidobacteriaceae	Bifidobacterium	Bifidobacterium_catenulatum	0.786002	-0.00678298
Bacteria	Firmicutes	Negativicutes	Selenomonadales	Acidaminococcaceae	Phascolarctobacterium	Phascolarctobacterium_succinatutens	0.786109	0.247926
Bacteria	Firmicutes	Clostridia	Clostridiales	Ruminococcaceae	Faecalibacterium	Faecalibacterium_prausnitzii	0.793187	-0.180971
Bacteria	Firmicutes	Clostridia	Clostridiales	Ruminococcaceae	Ruminococcus	Ruminococcus_sp_5_1_39BFAA	0.798292	0.0741448
Bacteria	Firmicutes	Clostridia	Clostridiales	Eubacteriaceae	Eubacterium	Eubacterium_ventriosum	0.801179	0.206521
Bacteria	Firmicutes	Clostridia	Clostridiales	Lachnospiraceae	Anaerostipes	Anaerostipes_hadrus	0.816961	-0.096669
Bacteria	Firmicutes	Clostridia	Clostridiales	Lachnospiraceae	Roseburia	Roseburia_intestinalis	0.830203	-0.611169
Bacteria	Actinobacteria	Actinobacteria	Bifidobacteriales	Bifidobacteriaceae	Bifidobacterium	Bifidobacterium_pseudocatenulatum	0.833102	0.0916146
Bacteria	Actinobacteria	Actinobacteria	Coriobacteriales	Coriobacteriaceae	Eggerthella	Eggerthella_unclassified	0.869015	0.0324306
Bacteria	Actinobacteria	Actinobacteria	Coriobacteriales	Coriobacteriaceae	Collinsella	Collinsella_aerofaciens	0.897118	-0.110273
