# Supplementary material for: The East Asian gut microbiome is distinct from colocalized White subjects and connected to metabolic health
Source: eLife journal article supplement (doi:10.7554/elife.70349), 2021-10-07
Supplement: supp [file elife-70349-supp-v2.zip › elife_poa_e70349_Figure_3_source_data_1.xlsx]

## Sheet: Figure 3A
SampleID	Ethnicity	PC1	PC2
OB024	EA	24.0085	7.20313
OB035	EA	20.2998	4.73025
OB040	EA	18.5033	0.0783856
OB043	EA	-5.72258	42.1978
OB051	EA	-0.978295	-5.95603
OB070	EA	38.0209	23.9585
OB079	EA	-8.72868	12.9037
OB084	EA	8.20506	-11.5935
OB085	EA	28.9156	8.44223
OB088	EA	12.6261	-20.1001
OB018	W	-2.98952	-18.4872
OB039	W	22.7327	-24.6337
OB046	W	-4.80998	-35.3282
OB059	W	-35.0605	28.4599
OB063	W	-35.0035	-19.4463
OB064	W	-16.5695	-19.1696
OB067	W	-29.4764	-9.11859
OB069	W	-21.1171	11.3877
OB071	W	26.5628	8.22012
OB081	W	-39.4186	16.2515

## Sheet: Figure 3B
SampleID	Ethnicity	Acetate	Propionate	Valine	Hypoxanthine	Formate	Alanine	Proline	Xanthine
OB024	EA	0.725279	1.85462	1.86753	-0.143383	-0.89734	-0.904015	-1.57067	-0.280762
OB035	EA	-0.56016	-0.133991	-0.106516	-1.26128	-1.40975	-0.19141	1.06281	-1.19558
OB040	EA	-0.0457442	0.984514	1.03826	-0.894376	-0.565291	-0.32182	0.194565	-1.07111
OB043	EA	0.687574	0.96109	0.946784	-0.674281	-0.114258	-1.69544	-0.45702	-0.988211
OB051	EA	-0.799291	-0.529606	-0.500182	-0.834964	-0.792992	0.399488	-0.421696	-0.734736
OB070	EA	2.08949	-0.708685	-0.598103	-0.934403	-1.44694	-1.13793	-1.8467	-0.315347
OB079	EA	0.952985	2.47256	2.36866	1.12561	0.245531	-0.47821	0.348496	0.442488
OB084	EA	0.341586	-0.0436675	0.0442393	-0.567314	0.506401	0.100925	-0.239444	-0.707341
OB085	EA	0.849687	0.493151	0.604203	-0.259098	-0.916226	-0.198011	-1.44019	-0.279413
OB088	EA	0.771591	-0.738636	-0.641302	-1.09792	-0.334522	-0.389986	-0.275643	-0.379351
OB018	W	-1.10116	-1.11359	-1.14054	1.39015	0.164437	1.28156	1.20964	1.24402
OB039	W	-1.37155	-0.823363	-0.834042	-1.01205	-0.229347	1.2329	-0.253239	-0.498339
OB046	W	-1.51698	-1.09829	-1.17955	0.221479	1.15244	2.43135	0.503636	-0.677798
OB059	W	0.202954	0.572689	0.505106	0.26668	0.8185	-0.503318	1.20866	-0.0864786
OB063	W	-0.31654	-0.305658	-0.414673	1.07955	1.49015	0.922379	1.621	-0.0326658
OB064	W	-1.51054	-0.546388	-0.58134	0.121123	2.38183	1.30615	0.570479	0.311693
OB067	W	-0.0819502	-0.337844	-0.342045	1.95682	0.229713	-0.211958	-0.385091	0.8824
OB069	W	0.214071	-0.864018	-0.943346	1.70377	0.522218	-0.0476166	0.900069	1.89268
OB071	W	1.32015	0.744109	0.779795	-0.682976	-1.19716	-0.597409	-1.3188	-0.182351
OB081	W	-0.851451	-0.839002	-0.872944	0.496871	0.392609	-0.99763	0.589139	2.6562

## Sheet: Figure 3C,D,E
SampleID	Ethnicity	Acetate	Propionate	Isobutyrate
OB024	EA	6287.74	760.868	273.874
OB035	EA	2432.32	270.228	253.446
OB040	EA	2704.3	278.978	454.688
OB043	EA	3799.43	378.05	106.945
OB051	EA	2226.65	219.906	275.872
OB070	EA	4400.19	301.688	-38.5485
OB079	EA	3592.32	397.249	280.31
OB084	EA	4311.44	376.77	221.195
OB085	EA	4014.31	365.282	257.41
OB088	EA	4444.24	328.986	149.751
OB018	W	1809.2	224.587	46.6776
OB039	W	1479.32	212.254	135.405
OB046	W	1011.89	151.437	68.8517
OB059	W	1476.12	195.868	37.2309
OB063	W	1615.99	194.681	45.1193
OB064	W	1607.51	217.363	182.165
OB067	W	2773.64	279.636	107.486
OB069	W	2283.88	211.242	7.90152
OB071	W	4574.29	431.942	96.5724
OB081	W	2005.45	218.506	92.3922
