# Supplementary material for: The East Asian gut microbiome is distinct from colocalized White subjects and connected to metabolic health
Source: eLife journal article supplement (doi:10.7554/elife.70349), 2021-10-07
Supplement: supp [file elife-70349-supp-v2.zip › elife_poa_e70349_Figure_4_source_data_1.xlsx]

## Sheet: Figure 4A,B,C
SampleID	Ethnicity	BMI classification	BMI	Body fat (%)	Faith's PD	Richness	Shannon diversity
OB026	EA	Lean	22.4	26.7	16.3975	268	3.89082
OB027	EA	Lean	20.1	36	16.6814	300	4.2089
OB030	EA	Lean	24.5	23.8	15.8706	281	4.01221
OB035	EA	Lean	19.8	29.5	13.0235	160	3.35052
OB040	EA	Lean	21.8	36	14.1947	202	3.66401
OB041	EA	Lean	23.4	41.1	16.6915	262	3.9567
OB044	EA	Lean	24.4	29.9	11.7584	164	3.681
OB051	EA	Lean	19.7	35.4	14.7009	233	3.85732
OB057	EA	Lean	20.2	40.2	16.631	263	3.93909
OB070	EA	Lean	22.2	33.4	12.3879	187	3.47058
OB078	EA	Lean	24.4	33.7	14.7394	245	3.97334
OB084	EA	Lean	24.3	21	11.8288	184	3.66806
OB020	W	Lean	19.2	18.7	16.7155	291	4.0804
OB042	W	Lean	25.2	28.8	17.7097	304	4.1153
OB045	W	Lean	22.6	39.6	14.7963	240	4.01214
OB059	W	Lean	20.4	33.7	16.3142	255	4.08041
OB063	W	Lean	24.3	28.4	22.9964	405	4.27246
OB064	W	Lean	20.5	26.3	19.5288	304	4.2622
OB066	W	Lean	19.2	29.9	24.4123	446	4.2967
OB068	W	Lean	20.6	30.8	23.7133	447	4.51948
OB069	W	Lean	20.7	22.1	19.0374	320	4.18436
OB081	W	Lean	24.1	31.1	16.6289	263	4.38588
OB082	W	Lean	21.8	38.2	25.155	486	4.69847
OB012	EA	Obese	34.1	40.9	17.4337	271	3.75391
OB021	EA	Obese	36.5	31.3	10.7186	147	3.28393
OB022	EA	Obese	26.8	41.7	13.8751	196	3.65868
OB024	EA	Obese	32.8	35.7	12.0277	181	3.58222
OB043	EA	Obese	40.3	47.1	14.9168	230	3.20203
OB055	EA	Obese	28.3	32.9	11.2496	169	3.45699
OB072	EA	Obese	26.8	39.6	12.801	185	3.78971
OB079	EA	Obese	29	28.7	17.2702	270	3.4629
OB085	EA	Obese	28.7	34.5	11.4547	152	3.63485
OB088	EA	Obese	46.8	47	11.3816	127	2.97525
OB006	W	Obese	30.2	34.8	15.4738	237	3.47754
OB008	W	Obese	41.3	46	12.6185	205	4.01094
OB011	W	Obese	39.9	NA	16.0651	237	3.93038
OB014	W	Obese	48.5	39.6	15.3623	227	3.77359
OB018	W	Obese	50.7	49	14.6235	216	3.74903
OB028	W	Obese	47.1	45.9	12.211	151	3.08537
OB036	W	Obese	37.4	45.3	14.5838	225	4.0873
OB039	W	Obese	35	50.2	13.0801	203	3.6475
OB046	W	Obese	30.1	42.3	18.3793	322	3.97228
OB050	W	Obese	36.8	36.9	13.0467	187	3.33518
OB056	W	Obese	43	48.1	15.5569	244	3.6852
OB067	W	Obese	37.8	37.3	18.9781	368	4.09711
OB071	W	Obese	42.9	46.2	15.7077	252	3.92219

## Sheet: Figure 4D
SampleID	Ethnicity	BMI classification	PC1	PC2
OB026	EA	Lean	-5.44047	-12.3422
OB027	EA	Lean	-7.28401	-6.01823
OB030	EA	Lean	16.9243	-13.0362
OB035	EA	Lean	21.4574	39.5087
OB040	EA	Lean	30.2011	15.901
OB041	EA	Lean	-5.86528	-13.0584
OB044	EA	Lean	34.6742	-11.476
OB051	EA	Lean	17.3998	10.244
OB057	EA	Lean	-3.086	7.57681
OB070	EA	Lean	5.40221	0.358564
OB078	EA	Lean	6.16024	-14.0024
OB084	EA	Lean	12.1162	-12.444
OB020	W	Lean	2.38674	-4.35522
OB042	W	Lean	-0.0898128	0.419715
OB045	W	Lean	-24.9635	16.1056
OB059	W	Lean	-4.56407	-7.3335
OB063	W	Lean	-16.2448	2.62227
OB064	W	Lean	-14.1451	-6.22773
OB066	W	Lean	-6.88017	-7.1897
OB068	W	Lean	-26.3978	21.6293
OB069	W	Lean	-5.27346	-6.95975
OB081	W	Lean	-14.5494	-0.943242
OB082	W	Lean	-11.9382	1.02056
OB012	EA	Obese	10.8798	6.36899
OB021	EA	Obese	-33.1649	-1.93143
OB022	EA	Obese	-26.9503	-17.7939
OB024	EA	Obese	5.47288	3.89313
OB043	EA	Obese	9.1268	-0.00952025
OB055	EA	Obese	16.391	-22.5477
OB072	EA	Obese	1.99085	-10.4732
OB079	EA	Obese	23.8292	0.367897
OB085	EA	Obese	-3.55932	-0.564797
OB088	EA	Obese	-3.45059	-24.5699
OB006	W	Obese	11.6757	13.4997
OB008	W	Obese	-6.49426	-20.2112
OB011	W	Obese	7.57852	32.2715
OB014	W	Obese	16.3304	-0.177455
OB018	W	Obese	16.5173	0.00411641
OB028	W	Obese	-25.6215	11.7564
OB036	W	Obese	1.57104	19.0248
OB039	W	Obese	6.80857	0.776466
OB046	W	Obese	-11.44	3.10309
OB050	W	Obese	-18.5868	13.3891
OB056	W	Obese	-25.7355	10.2074
OB067	W	Obese	19.1329	6.06524
OB071	W	Obese	7.69815	-22.4487

## Sheet: Figure 4E
SampleID	Ethnicity	BMI classification	PC1	PC2
OB035	EA	Lean	26.9479	-1.06875
OB040	EA	Lean	24.0411	-4.50765
OB051	EA	Lean	5.65936	-9.2464
OB070	EA	Lean	44.5216	20.0607
OB084	EA	Lean	12.5944	-17.3473
OB059	W	Lean	-26.4455	33.3974
OB063	W	Lean	-30.7464	-21.8998
OB064	W	Lean	-12.6497	-24.846
OB069	W	Lean	-13.2147	10.9857
OB081	W	Lean	-30.7081	14.472
OB024	EA	Obese	-2.18571	-24.0682
OB043	EA	Obese	54.4235	-6.95792
OB079	EA	Obese	15.2122	6.33831
OB085	EA	Obese	0.294785	-26.0438
OB088	EA	Obese	-21.056	-0.268392
OB018	W	Obese	-7.50013	18.2509
OB039	W	Obese	-30.7307	-7.13721
OB046	W	Obese	-19.7666	26.1624
OB067	W	Obese	14.7975	39.0591
OB071	W	Obese	-3.48883	-25.3351
