# Supplementary material for: The East Asian gut microbiome is distinct from colocalized White subjects and connected to metabolic health
Source: eLife journal article supplement (doi:10.7554/elife.70349), 2021-10-07
Supplement: supp [file elife-70349-supp-v2.zip › elife_poa_e70349_Figure_5_source_data_1.xlsx]

## Sheet: Figure 5A
Phylum	SampleID	Ethnicity	BMI classification	Abundance (CLR)
Actinobacteriota	OB026	EA	Lean	7.34482
Actinobacteriota	OB027	EA	Lean	7.84411
Actinobacteriota	OB030	EA	Lean	8.84074
Actinobacteriota	OB035	EA	Lean	8.70599
Actinobacteriota	OB040	EA	Lean	7.72508
Actinobacteriota	OB041	EA	Lean	5.35576
Actinobacteriota	OB044	EA	Lean	8.70097
Actinobacteriota	OB051	EA	Lean	9.08706
Actinobacteriota	OB057	EA	Lean	6.22575
Actinobacteriota	OB070	EA	Lean	5.02107
Actinobacteriota	OB078	EA	Lean	9.53781
Actinobacteriota	OB084	EA	Lean	7.23388
Actinobacteriota	OB020	W	Lean	6.80232
Actinobacteriota	OB042	W	Lean	5.26212
Actinobacteriota	OB045	W	Lean	6.32598
Actinobacteriota	OB059	W	Lean	6.16461
Actinobacteriota	OB063	W	Lean	6.17961
Actinobacteriota	OB064	W	Lean	6.84965
Actinobacteriota	OB066	W	Lean	6.75131
Actinobacteriota	OB068	W	Lean	6.29456
Actinobacteriota	OB069	W	Lean	7.55364
Actinobacteriota	OB081	W	Lean	5.38658
Actinobacteriota	OB082	W	Lean	5.17259
Actinobacteriota	OB012	EA	Obese	6.20923
Actinobacteriota	OB021	EA	Obese	7.62093
Actinobacteriota	OB022	EA	Obese	5.32648
Actinobacteriota	OB024	EA	Obese	6.94522
Actinobacteriota	OB043	EA	Obese	8.34927
Actinobacteriota	OB055	EA	Obese	9.66408
Actinobacteriota	OB072	EA	Obese	8.82532
Actinobacteriota	OB079	EA	Obese	7.81753
Actinobacteriota	OB085	EA	Obese	8.59775
Actinobacteriota	OB088	EA	Obese	5.19843
Actinobacteriota	OB006	W	Obese	7.20994
Actinobacteriota	OB008	W	Obese	7.0473
Actinobacteriota	OB011	W	Obese	8.69124
Actinobacteriota	OB014	W	Obese	7.2263
Actinobacteriota	OB018	W	Obese	6.51617
Actinobacteriota	OB028	W	Obese	4.22956
Actinobacteriota	OB036	W	Obese	7.17219
Actinobacteriota	OB039	W	Obese	10.3856
Actinobacteriota	OB046	W	Obese	8.39066
Actinobacteriota	OB050	W	Obese	7.70311
Actinobacteriota	OB056	W	Obese	7.15929
Actinobacteriota	OB067	W	Obese	6.80809
Actinobacteriota	OB071	W	Obese	7.75878
Bacteroidota	OB026	EA	Lean	9.69447
Bacteroidota	OB027	EA	Lean	10.2054
Bacteroidota	OB030	EA	Lean	9.39495
Bacteroidota	OB035	EA	Lean	9.38603
Bacteroidota	OB040	EA	Lean	8.30463
Bacteroidota	OB041	EA	Lean	9.16766
Bacteroidota	OB044	EA	Lean	10.3318
Bacteroidota	OB051	EA	Lean	8.54224
Bacteroidota	OB057	EA	Lean	6.81789
Bacteroidota	OB070	EA	Lean	11.4904
Bacteroidota	OB078	EA	Lean	9.78028
Bacteroidota	OB084	EA	Lean	9.27665
Bacteroidota	OB020	W	Lean	8.4775
Bacteroidota	OB042	W	Lean	8.93748
Bacteroidota	OB045	W	Lean	8.25722
Bacteroidota	OB059	W	Lean	9.66081
Bacteroidota	OB063	W	Lean	7.90719
Bacteroidota	OB064	W	Lean	9.62095
Bacteroidota	OB066	W	Lean	6.12765
Bacteroidota	OB068	W	Lean	7.54431
Bacteroidota	OB069	W	Lean	8.46238
Bacteroidota	OB081	W	Lean	8.35351
Bacteroidota	OB082	W	Lean	6.52131
Bacteroidota	OB012	EA	Obese	7.1979
Bacteroidota	OB021	EA	Obese	10.5857
Bacteroidota	OB022	EA	Obese	10.7662
Bacteroidota	OB024	EA	Obese	9.06364
Bacteroidota	OB043	EA	Obese	12.8061
Bacteroidota	OB055	EA	Obese	7.64772
Bacteroidota	OB072	EA	Obese	9.76497
Bacteroidota	OB079	EA	Obese	11.4026
Bacteroidota	OB085	EA	Obese	9.37855
Bacteroidota	OB088	EA	Obese	10.0856
Bacteroidota	OB006	W	Obese	8.32152
Bacteroidota	OB008	W	Obese	6.94188
Bacteroidota	OB011	W	Obese	8.56622
Bacteroidota	OB014	W	Obese	9.65529
Bacteroidota	OB018	W	Obese	8.803
Bacteroidota	OB028	W	Obese	9.58944
Bacteroidota	OB036	W	Obese	8.91544
Bacteroidota	OB039	W	Obese	8.58481
Bacteroidota	OB046	W	Obese	6.91777
Bacteroidota	OB050	W	Obese	7.22457
Bacteroidota	OB056	W	Obese	6.78132
Bacteroidota	OB067	W	Obese	8.30851
Bacteroidota	OB071	W	Obese	10.2051
Firmicutes	OB026	EA	Lean	11.9494
Firmicutes	OB027	EA	Lean	12.109
Firmicutes	OB030	EA	Lean	11.3745
Firmicutes	OB035	EA	Lean	12.1315
Firmicutes	OB040	EA	Lean	11.1615
Firmicutes	OB041	EA	Lean	11.3647
Firmicutes	OB044	EA	Lean	11.2367
Firmicutes	OB051	EA	Lean	10.6776
Firmicutes	OB057	EA	Lean	10.7477
Firmicutes	OB070	EA	Lean	12.6108
Firmicutes	OB078	EA	Lean	12.1008
Firmicutes	OB084	EA	Lean	11.2451
Firmicutes	OB020	W	Lean	11.6766
Firmicutes	OB042	W	Lean	10.6135
Firmicutes	OB045	W	Lean	10.3932
Firmicutes	OB059	W	Lean	11.2866
Firmicutes	OB063	W	Lean	9.47083
Firmicutes	OB064	W	Lean	11.487
Firmicutes	OB066	W	Lean	9.1615
Firmicutes	OB068	W	Lean	10.1016
Firmicutes	OB069	W	Lean	11.3282
Firmicutes	OB081	W	Lean	10.7097
Firmicutes	OB082	W	Lean	9.27914
Firmicutes	OB012	EA	Obese	10.8266
Firmicutes	OB021	EA	Obese	11.4636
Firmicutes	OB022	EA	Obese	11.639
Firmicutes	OB024	EA	Obese	10.9852
Firmicutes	OB043	EA	Obese	12.6279
Firmicutes	OB055	EA	Obese	12.1446
Firmicutes	OB072	EA	Obese	11.3496
Firmicutes	OB079	EA	Obese	11.5101
Firmicutes	OB085	EA	Obese	11.9502
Firmicutes	OB088	EA	Obese	11.6629
Firmicutes	OB006	W	Obese	10.4342
Firmicutes	OB008	W	Obese	12.9125
Firmicutes	OB011	W	Obese	11.5385
Firmicutes	OB014	W	Obese	11.0233
Firmicutes	OB018	W	Obese	10.8569
Firmicutes	OB028	W	Obese	8.54574
Firmicutes	OB036	W	Obese	11.9285
Firmicutes	OB039	W	Obese	11.6193
Firmicutes	OB046	W	Obese	11.1211
Firmicutes	OB050	W	Obese	12.4014
Firmicutes	OB056	W	Obese	10.7713
Firmicutes	OB067	W	Obese	11.1916
Firmicutes	OB071	W	Obese	11.9347
Fusobacteriota	OB026	EA	Lean	-6.72
Fusobacteriota	OB027	EA	Lean	-6.39586
Fusobacteriota	OB030	EA	Lean	-2.57642
Fusobacteriota	OB035	EA	Lean	-1.48927
Fusobacteriota	OB040	EA	Lean	1.59184
Fusobacteriota	OB041	EA	Lean	-4.11684
Fusobacteriota	OB044	EA	Lean	-6.16056
Fusobacteriota	OB051	EA	Lean	-4.18759
Fusobacteriota	OB057	EA	Lean	-3.74269
Fusobacteriota	OB070	EA	Lean	-2.87635
Fusobacteriota	OB078	EA	Lean	-3.1898
Fusobacteriota	OB084	EA	Lean	-0.177276
Fusobacteriota	OB020	W	Lean	-2.64026
Fusobacteriota	OB042	W	Lean	-8.00861
Fusobacteriota	OB045	W	Lean	-7.60263
Fusobacteriota	OB059	W	Lean	-2.92176
Fusobacteriota	OB063	W	Lean	-9.0349
Fusobacteriota	OB064	W	Lean	-6.91574
Fusobacteriota	OB066	W	Lean	-9.38759
Fusobacteriota	OB068	W	Lean	-8.74097
Fusobacteriota	OB069	W	Lean	-7.35818
Fusobacteriota	OB081	W	Lean	-4.58007
Fusobacteriota	OB082	W	Lean	-9.30561
Fusobacteriota	OB012	EA	Obese	-3.73925
Fusobacteriota	OB021	EA	Obese	0.465859
Fusobacteriota	OB022	EA	Obese	-1.80341
Fusobacteriota	OB024	EA	Obese	3.49757
Fusobacteriota	OB043	EA	Obese	-5.35496
Fusobacteriota	OB055	EA	Obese	0.38232
Fusobacteriota	OB072	EA	Obese	-1.70594
Fusobacteriota	OB079	EA	Obese	-6.61729
Fusobacteriota	OB085	EA	Obese	-6.2518
Fusobacteriota	OB088	EA	Obese	6.01444
Fusobacteriota	OB006	W	Obese	-7.79362
Fusobacteriota	OB008	W	Obese	-4.11949
Fusobacteriota	OB011	W	Obese	-2.9876
Fusobacteriota	OB014	W	Obese	-7.00784
Fusobacteriota	OB018	W	Obese	-3.5446
Fusobacteriota	OB028	W	Obese	9.16909
Fusobacteriota	OB036	W	Obese	-5.53236
Fusobacteriota	OB039	W	Obese	1.391
Fusobacteriota	OB046	W	Obese	-6.79765
Fusobacteriota	OB050	W	Obese	-5.69336
Fusobacteriota	OB056	W	Obese	-7.339
Fusobacteriota	OB067	W	Obese	-7.28112
Fusobacteriota	OB071	W	Obese	-6.84026
Proteobacteria	OB026	EA	Lean	4.72966
Proteobacteria	OB027	EA	Lean	5.22298
Proteobacteria	OB030	EA	Lean	6.05083
Proteobacteria	OB035	EA	Lean	2.45117
Proteobacteria	OB040	EA	Lean	3.21295
Proteobacteria	OB041	EA	Lean	4.63714
Proteobacteria	OB044	EA	Lean	4.1625
Proteobacteria	OB051	EA	Lean	4.12723
Proteobacteria	OB057	EA	Lean	1.7726
Proteobacteria	OB070	EA	Lean	5.72622
Proteobacteria	OB078	EA	Lean	3.92683
Proteobacteria	OB084	EA	Lean	5.2634
Proteobacteria	OB020	W	Lean	2.8516
Proteobacteria	OB042	W	Lean	5.18013
Proteobacteria	OB045	W	Lean	3.787
Proteobacteria	OB059	W	Lean	3.64273
Proteobacteria	OB063	W	Lean	3.484
Proteobacteria	OB064	W	Lean	5.05904
Proteobacteria	OB066	W	Lean	2.45044
Proteobacteria	OB068	W	Lean	4.75851
Proteobacteria	OB069	W	Lean	2.22866
Proteobacteria	OB081	W	Lean	3.40747
Proteobacteria	OB082	W	Lean	2.37695
Proteobacteria	OB012	EA	Obese	5.55696
Proteobacteria	OB021	EA	Obese	4.29448
Proteobacteria	OB022	EA	Obese	6.39193
Proteobacteria	OB024	EA	Obese	5.38139
Proteobacteria	OB043	EA	Obese	5.88643
Proteobacteria	OB055	EA	Obese	6.48757
Proteobacteria	OB072	EA	Obese	5.08247
Proteobacteria	OB079	EA	Obese	1.69105
Proteobacteria	OB085	EA	Obese	5.87458
Proteobacteria	OB088	EA	Obese	5.14322
Proteobacteria	OB006	W	Obese	3.94742
Proteobacteria	OB008	W	Obese	3.73226
Proteobacteria	OB011	W	Obese	7.43504
Proteobacteria	OB014	W	Obese	3.20283
Proteobacteria	OB018	W	Obese	1.30163
Proteobacteria	OB028	W	Obese	3.78706
Proteobacteria	OB036	W	Obese	1.54446
Proteobacteria	OB039	W	Obese	4.95739
Proteobacteria	OB046	W	Obese	3.68918
Proteobacteria	OB050	W	Obese	5.21128
Proteobacteria	OB056	W	Obese	1.99416
Proteobacteria	OB067	W	Obese	3.17112
Proteobacteria	OB071	W	Obese	4.5483
Verrucomicrobiota	OB026	EA	Lean	-1.36245
Verrucomicrobiota	OB027	EA	Lean	-0.904007
Verrucomicrobiota	OB030	EA	Lean	-1.69506
Verrucomicrobiota	OB035	EA	Lean	-5.57673
Verrucomicrobiota	OB040	EA	Lean	-1.86759
Verrucomicrobiota	OB041	EA	Lean	-2.82138
Verrucomicrobiota	OB044	EA	Lean	-1.91263
Verrucomicrobiota	OB051	EA	Lean	0.0384764
Verrucomicrobiota	OB057	EA	Lean	5.14429
Verrucomicrobiota	OB070	EA	Lean	-1.03985
Verrucomicrobiota	OB078	EA	Lean	-6.35973
Verrucomicrobiota	OB084	EA	Lean	-2.43824
Verrucomicrobiota	OB020	W	Lean	0.491448
Verrucomicrobiota	OB042	W	Lean	4.87689
Verrucomicrobiota	OB045	W	Lean	5.20089
Verrucomicrobiota	OB059	W	Lean	-0.900696
Verrucomicrobiota	OB063	W	Lean	1.82696
Verrucomicrobiota	OB064	W	Lean	-1.70628
Verrucomicrobiota	OB066	W	Lean	5.50614
Verrucomicrobiota	OB068	W	Lean	4.70831
Verrucomicrobiota	OB069	W	Lean	-2.22889
Verrucomicrobiota	OB081	W	Lean	-2.14711
Verrucomicrobiota	OB082	W	Lean	4.72738
Verrucomicrobiota	OB012	EA	Obese	0.361215
Verrucomicrobiota	OB021	EA	Obese	-1.66879
Verrucomicrobiota	OB022	EA	Obese	0.217655
Verrucomicrobiota	OB024	EA	Obese	-3.12664
Verrucomicrobiota	OB043	EA	Obese	-5.35496
Verrucomicrobiota	OB055	EA	Obese	-1.93961
Verrucomicrobiota	OB072	EA	Obese	-2.23645
Verrucomicrobiota	OB079	EA	Obese	-6.61729
Verrucomicrobiota	OB085	EA	Obese	-1.39382
Verrucomicrobiota	OB088	EA	Obese	-1.80816
Verrucomicrobiota	OB006	W	Obese	3.05891
Verrucomicrobiota	OB008	W	Obese	-1.79756
Verrucomicrobiota	OB011	W	Obese	-6.68804
Verrucomicrobiota	OB014	W	Obese	5.35493
Verrucomicrobiota	OB018	W	Obese	6.69176
Verrucomicrobiota	OB028	W	Obese	-2.78671
Verrucomicrobiota	OB036	W	Obese	-1.83192
Verrucomicrobiota	OB039	W	Obese	-1.96488
Verrucomicrobiota	OB046	W	Obese	-3.62773
Verrucomicrobiota	OB050	W	Obese	-1.99292
Verrucomicrobiota	OB056	W	Obese	7.10077
Verrucomicrobiota	OB067	W	Obese	6.61247
Verrucomicrobiota	OB071	W	Obese	-1.98228

## Sheet: Figure 5B
Kingdom	Phylum	Class	Order	Family	Genus	p-value	FDR	Log2 fold difference (EA/W)
Bacteria	Firmicutes	Clostridia	Lachnospirales	Lachnospiraceae	Blautia	0.000139579	0.00992361	2.0755
Bacteria	Firmicutes	Clostridia	Lachnospirales	Lachnospiraceae	[Ruminococcus] torques group	0.000203636	0.0102946	2.44954
Bacteria	Bacteroidota	Bacteroidia	Bacteroidales	Bacteroidaceae	Bacteroides	0.000925566	0.0280462	2.65377
Bacteria	Firmicutes	Clostridia	Lachnospirales	Lachnospiraceae	[Eubacterium] xylanophilum group	0.00253375	0.0448354	-5.63886
Bacteria	Actinobacteriota	Coriobacteriia	Coriobacteriales	Eggerthellaceae	Eggerthella	0.0025519	0.0448631	4.75584
Bacteria	Firmicutes	Clostridia	Lachnospirales	Lachnospiraceae	Fusicatenibacter	0.00336694	0.0552672	2.64403
Bacteria	Firmicutes	Clostridia	Lachnospirales	Lachnospiraceae	Anaerostipes	0.00477171	0.0654748	1.60201
Bacteria	Firmicutes	Bacilli	Lactobacillales	Streptococcaceae	Streptococcus	0.00982988	0.0994984	2.38232
Bacteria	Firmicutes	Clostridia	Lachnospirales	Lachnospiraceae	Lachnospiraceae UCG-001	0.010843	0.100783	-3.36686
Bacteria	Firmicutes	Clostridia	Lachnospirales	Lachnospiraceae	Lachnoclostridium	0.0125603	0.107717	2.34082
Bacteria	Bacteroidota	Bacteroidia	Bacteroidales	Tannerellaceae	Parabacteroides	0.0150732	0.114464	1.35922
Bacteria	Firmicutes	Clostridia	Oscillospirales	Ruminococcaceae	Incertae Sedis	0.0175189	0.123285	2.00838
Bacteria	Bacteroidota	Bacteroidia	Bacteroidales	Prevotellaceae	Prevotellaceae NK3B31 group	0.0264981	0.131354	-6.9671
Bacteria	Firmicutes	Clostridia	Lachnospirales	Lachnospiraceae	[Ruminococcus] gnavus group	0.0236648	0.138632	3.85304
Bacteria	Firmicutes	Clostridia	Clostridia UCG-014	NA	NA	0.0297249	0.164697	-3.655
Bacteria	Firmicutes	Clostridia	Lachnospirales	Lachnospiraceae	Dorea	0.0330472	0.17219	1.99728
Bacteria	Firmicutes	Clostridia	Eubacteriales	Eubacteriaceae	Eubacterium	0.0460447	0.177614	4.49047
Bacteria	Firmicutes	Clostridia	Oscillospirales	Ruminococcaceae	UBA1819	0.0425229	0.196024	1.4394
Bacteria	Verrucomicrobiota	Verrucomicrobiae	Verrucomicrobiales	Akkermansiaceae	Akkermansia	0.0429161	0.196896	-3.5244
Bacteria	Firmicutes	Clostridia	Oscillospirales	[Eubacterium] coprostanoligenes group	NA	0.045701	0.201001	-2.16449
Bacteria	Firmicutes	Clostridia	Oscillospirales	Oscillospiraceae	NK4A214 group	0.0478889	0.206071	-2.3168
Bacteria	Firmicutes	Negativicutes	Veillonellales-Selenomonadales	Veillonellaceae	Megasphaera	0.0689782	0.212467	3.25137
Bacteria	Firmicutes	Clostridia	Oscillospirales	Oscillospiraceae	UCG-005	0.0561188	0.22315	-1.09993
Bacteria	Firmicutes	Bacilli	Erysipelotrichales	Erysipelatoclostridiaceae	Catenibacterium	0.0801633	0.239187	2.73575
Bacteria	Bacteroidota	Bacteroidia	Bacteroidales	Prevotellaceae	NA	0.090614	0.258664	-5.98081
Bacteria	Firmicutes	Clostridia	Christensenellales	Christensenellaceae	Christensenellaceae R-7 group	0.077959	0.267456	-2.69859
Bacteria	Firmicutes	Clostridia	Oscillospirales	Oscillospiraceae	Flavonifractor	0.0982612	0.286384	2.6315
Bacteria	Firmicutes	Clostridia	Lachnospirales	Lachnospiraceae	[Eubacterium] eligens group	0.103429	0.313072	-0.613386
Bacteria	Firmicutes	Clostridia	Oscillospirales	Ruminococcaceae	Ruminococcus	0.106954	0.315403	-1.44027
Bacteria	Firmicutes	Clostridia	Lachnospirales	Lachnospiraceae	Agathobacter	0.104837	0.315507	1.68808
Bacteria	Actinobacteriota	Coriobacteriia	Coriobacteriales	Eggerthellaceae	NA	0.119453	0.315767	-4.31772
Bacteria	Firmicutes	Bacilli	RF39	NA	NA	0.1294	0.318718	-4.89629
Bacteria	Firmicutes	Clostridia	Lachnospirales	Lachnospiraceae	[Eubacterium] ventriosum group	0.111883	0.321588	-0.829262
Bacteria	Actinobacteriota	Coriobacteriia	Coriobacteriales	Coriobacteriales Incertae Sedis	NA	0.128755	0.323765	-4.7016
Bacteria	Firmicutes	Negativicutes	Acidaminococcales	Acidaminococcaceae	Phascolarctobacterium	0.114107	0.326844	1.62526
Bacteria	Actinobacteriota	Actinobacteria	Bifidobacteriales	Bifidobacteriaceae	Bifidobacterium	0.126293	0.340673	2.09647
Bacteria	Firmicutes	Negativicutes	Acidaminococcales	Acidaminococcaceae	Acidaminococcus	0.152792	0.353418	3.41764
Archaea	Euryarchaeota	Methanobacteria	Methanobacteriales	Methanobacteriaceae	Methanobrevibacter	0.167135	0.374484	-2.14427
Bacteria	Firmicutes	Clostridia	Clostridiales	Clostridiaceae	Clostridium sensu stricto 1	0.158215	0.380243	-1.87378
Bacteria	Firmicutes	Clostridia	Oscillospirales	Butyricicoccaceae	Butyricicoccus	0.161978	0.385319	0.778579
Bacteria	Firmicutes	Clostridia	NA	NA	NA	0.191072	0.388721	-3.50473
Bacteria	Firmicutes	Clostridia	Oscillospirales	Ruminococcaceae	CAG-352	0.173272	0.399349	-3.15125
Bacteria	Actinobacteriota	Coriobacteriia	Coriobacteriales	Eggerthellaceae	Slackia	0.193495	0.400215	3.12308
Bacteria	Proteobacteria	Gammaproteobacteria	Enterobacterales	Enterobacteriaceae	Escherichia-Shigella	0.195451	0.421528	1.43463
Bacteria	Firmicutes	Clostridia	Oscillospirales	Ruminococcaceae	Faecalibacterium	0.201703	0.427104	1.1579
Bacteria	Actinobacteriota	Coriobacteriia	Coriobacteriales	Eggerthellaceae	Senegalimassilia	0.231459	0.430718	-4.17572
Bacteria	Firmicutes	Clostridia	Lachnospirales	Lachnospiraceae	Lachnospiraceae FCS020 group	0.206848	0.433841	0.00124491
Bacteria	Firmicutes	Clostridia	Lachnospirales	Lachnospiraceae	Marvinbryantia	0.233921	0.461408	-0.371001
Bacteria	Firmicutes	Negativicutes	Veillonellales-Selenomonadales	Selenomonadaceae	Megamonas	0.258297	0.469819	1.59804
Bacteria	Firmicutes	Bacilli	Erysipelotrichales	Erysipelatoclostridiaceae	Erysipelatoclostridium	0.255267	0.478229	2.07195
Bacteria	Firmicutes	Bacilli	Erysipelotrichales	Erysipelotrichaceae	Turicibacter	0.25678	0.481985	-0.654356
Bacteria	Firmicutes	Clostridia	Oscillospirales	Oscillospiraceae	UCG-003	0.26092	0.485284	0.0370768
Bacteria	Firmicutes	Clostridia	Lachnospirales	Lachnospiraceae	CAG-56	0.278148	0.498702	2.60395
Bacteria	Firmicutes	Clostridia	Lachnospirales	Lachnospiraceae	NA	0.291815	0.518677	0.595133
Bacteria	Desulfobacterota	Desulfovibrionia	Desulfovibrionales	Desulfovibrionaceae	Bilophila	0.315074	0.532691	1.59011
Bacteria	Firmicutes	Clostridia	Lachnospirales	Lachnospiraceae	[Ruminococcus] gauvreauii group	0.304921	0.535635	0.724453
Bacteria	Firmicutes	Clostridia	Lachnospirales	Lachnospiraceae	Sellimonas	0.34182	0.543966	2.27088
Bacteria	Firmicutes	Clostridia	Lachnospirales	Lachnospiraceae	Lachnospiraceae NK4A136 group	0.33279	0.556225	0.481907
Bacteria	Firmicutes	Clostridia	Lachnospirales	Lachnospiraceae	[Eubacterium] ruminantium group	0.406234	0.585082	-0.453936
Bacteria	Firmicutes	Clostridia	Lachnospirales	Lachnospiraceae	Lachnospiraceae ND3007 group	0.361582	0.586429	-0.471157
Bacteria	Firmicutes	Clostridia	Oscillospirales	Ruminococcaceae	[Eubacterium] siraeum group	0.401305	0.599637	-1.66893
Bacteria	Firmicutes	Clostridia	Oscillospirales	Ruminococcaceae	Subdoligranulum	0.38088	0.601172	-0.219436
Bacteria	Actinobacteriota	Coriobacteriia	Coriobacteriales	Coriobacteriaceae	Collinsella	0.394636	0.610093	1.44379
Bacteria	Firmicutes	Clostridia	Oscillospirales	Oscillospiraceae	Intestinimonas	0.462351	0.659384	0.0666081
Bacteria	Firmicutes	Clostridia	Lachnospirales	Lachnospiraceae	Lachnospiraceae UCG-004	0.480176	0.660823	0.877588
Bacteria	Bacteroidota	Bacteroidia	Bacteroidales	Prevotellaceae	Alloprevotella	0.490014	0.664101	2.274
Bacteria	Bacteroidota	Bacteroidia	Bacteroidales	Barnesiellaceae	Barnesiella	0.501417	0.673836	-1.11024
Bacteria	Firmicutes	Clostridia	Oscillospirales	Oscillospiraceae	UCG-002	0.486322	0.679337	-0.362134
Bacteria	Firmicutes	Negativicutes	Veillonellales-Selenomonadales	Veillonellaceae	Dialister	0.495935	0.683283	-0.738719
Bacteria	Firmicutes	Clostridia	Monoglobales	Monoglobaceae	Monoglobus	0.487434	0.683437	-0.701139
Bacteria	Firmicutes	Clostridia	Christensenellales	Christensenellaceae	NA	0.537619	0.704513	-1.82814
Bacteria	Proteobacteria	Gammaproteobacteria	Burkholderiales	Sutterellaceae	Parasutterella	0.541756	0.71302	1.56264
Bacteria	Firmicutes	Clostridia	Lachnospirales	Lachnospiraceae	Frisingicoccus	0.554803	0.715385	1.39163
Bacteria	Firmicutes	Clostridia	Lachnospirales	Lachnospiraceae	Tyzzerella	0.576309	0.728664	1.21093
Bacteria	Bacteroidota	Bacteroidia	Bacteroidales	Marinifilaceae	Odoribacter	0.572657	0.731674	-0.346408
Bacteria	Firmicutes	Clostridia	Peptostreptococcales-Tissierellales	Peptostreptococcaceae	Intestinibacter	0.571283	0.73783	0.760654
Bacteria	Bacteroidota	Bacteroidia	Bacteroidales	Prevotellaceae	Prevotellaceae UCG-001	0.624183	0.756768	0.620731
Bacteria	Bacteroidota	Bacteroidia	Bacteroidales	Rikenellaceae	Alistipes	0.608999	0.769203	0.27361
Bacteria	Actinobacteriota	Coriobacteriia	Coriobacteriales	Eggerthellaceae	Enterorhabdus	0.636456	0.772187	0.945557
Bacteria	Firmicutes	Bacilli	Erysipelotrichales	Erysipelotrichaceae	Holdemanella	0.629194	0.775312	1.43303
Bacteria	Firmicutes	Clostridia	Lachnospirales	Lachnospiraceae	Coprococcus	0.6221	0.775356	-0.243975
Bacteria	Firmicutes	Clostridia	Lachnospirales	Lachnospiraceae	[Eubacterium] hallii group	0.63226	0.779439	0.679035
Bacteria	Firmicutes	Clostridia	Lachnospirales	Lachnospiraceae	Lachnospiraceae UCG-010	0.656185	0.788154	0.532019
Bacteria	Proteobacteria	Gammaproteobacteria	Burkholderiales	Sutterellaceae	Sutterella	0.667235	0.793004	-0.591182
Bacteria	Firmicutes	Clostridia	Peptostreptococcales-Tissierellales	Anaerovoracaceae	Family XIII AD3011 group	0.660901	0.795411	0.593116
Bacteria	Actinobacteriota	Coriobacteriia	Coriobacteriales	Eggerthellaceae	Adlercreutzia	0.672354	0.796445	0.924126
Bacteria	Firmicutes	Clostridia	Oscillospirales	Oscillospiraceae	Oscillibacter	0.673145	0.802	0.241514
Bacteria	Firmicutes	Bacilli	Lactobacillales	Lactobacillaceae	Lactobacillus	0.694074	0.812975	1.09582
Bacteria	Bacteroidota	Bacteroidia	Bacteroidales	Muribaculaceae	NA	0.722287	0.824275	1.33016
Bacteria	Firmicutes	Bacilli	Erysipelotrichales	Erysipelatoclostridiaceae	Erysipelotrichaceae UCG-003	0.714078	0.832036	1.2246
Bacteria	Firmicutes	Clostridia	Oscillospirales	Oscillospiraceae	NA	0.772557	0.864403	0.124584
Bacteria	Bacteroidota	Bacteroidia	Bacteroidales	Prevotellaceae	Paraprevotella	0.793627	0.873542	0.145342
Bacteria	Proteobacteria	Gammaproteobacteria	Pasteurellales	Pasteurellaceae	Haemophilus	0.800707	0.876117	-0.282581
Bacteria	Firmicutes	Clostridia	Oscillospirales	Ruminococcaceae	NA	0.810176	0.885648	0.502785
Bacteria	Firmicutes	Clostridia	Oscillospirales	Oscillospiraceae	Colidextribacter	0.819536	0.889218	0.0684852
Bacteria	Firmicutes	Clostridia	Peptostreptococcales-Tissierellales	Peptostreptococcaceae	Romboutsia	0.826049	0.894174	0.322246
Bacteria	Bacteroidota	Bacteroidia	Bacteroidales	Prevotellaceae	Prevotella	0.828552	0.894779	0.623272
Bacteria	Firmicutes	Clostridia	Lachnospirales	Lachnospiraceae	Lachnospira	0.848741	0.906778	1.13152
Bacteria	Firmicutes	Clostridia	Lachnospirales	Lachnospiraceae	Roseburia	0.88162	0.923835	0.422647

## Sheet: Figure 5C
Kingdom	Phylum	Class	Order	Family	Genus	p-value	FDR	Log2 fold difference (EA/W)
Bacteria	Actinobacteriota	Coriobacteriia	Coriobacteriales	Eggerthellaceae	Adlercreutzia	0.00131486	0.0394428	-8.2568
Bacteria	Firmicutes	Clostridia	Lachnospirales	Lachnospiraceae	Lachnospiraceae UCG-004	0.00186044	0.080374	4.96195
Bacteria	Firmicutes	Bacilli	Lactobacillales	Streptococcaceae	Streptococcus	0.00377424	0.102947	2.7328
Bacteria	Firmicutes	Clostridia	Oscillospirales	Butyricicoccaceae	Butyricicoccus	0.00459914	0.10686	2.1004
Bacteria	Firmicutes	Clostridia	Peptostreptococcales-Tissierellales	Peptostreptococcaceae	Romboutsia	0.024182	0.258444	5.34095
Bacteria	Firmicutes	Clostridia	Clostridia UCG-014	NA	NA	0.0247361	0.311182	-5.0049
Bacteria	Firmicutes	Clostridia	Oscillospirales	Ruminococcaceae	Negativibacillus	0.0439354	0.424054	-4.82831
Bacteria	Firmicutes	Clostridia	Oscillospirales	Oscillospiraceae	NA	0.038668	0.450255	-2.59847
Bacteria	Firmicutes	Clostridia	Lachnospirales	Lachnospiraceae	[Eubacterium] fissicatena group	0.133979	0.581366	-3.60968
Bacteria	Proteobacteria	Gammaproteobacteria	Enterobacterales	Enterobacteriaceae	Escherichia-Shigella	0.0787617	0.604187	3.00673
Bacteria	Firmicutes	Clostridia	Lachnospirales	Lachnospiraceae	Anaerostipes	0.090211	0.612081	2.27956
Bacteria	Firmicutes	Clostridia	Lachnospirales	Lachnospiraceae	Dorea	0.0973365	0.614757	0.992991
Bacteria	Firmicutes	Clostridia	Oscillospirales	Ruminococcaceae	NA	0.091518	0.618333	-2.29035
Bacteria	Firmicutes	Clostridia	Oscillospirales	Ruminococcaceae	UBA1819	0.149998	0.647149	-2.83737
Bacteria	Firmicutes	Clostridia	Lachnospirales	Lachnospiraceae	Marvinbryantia	0.15042	0.655796	-1.97483
Bacteria	Firmicutes	Clostridia	Oscillospirales	[Eubacterium] coprostanoligenes group	NA	0.141334	0.663115	-1.98651
Bacteria	Fusobacteriota	Fusobacteriia	Fusobacteriales	Fusobacteriaceae	Fusobacterium	0.212806	0.671611	4.26264
Bacteria	Firmicutes	Clostridia	Peptostreptococcales-Tissierellales	Peptostreptococcaceae	Intestinibacter	0.210661	0.673836	2.62696
Bacteria	Firmicutes	Negativicutes	Veillonellales-Selenomonadales	Selenomonadaceae	Anaerovibrio	0.316112	0.68366	1.41651
Bacteria	Firmicutes	Negativicutes	Veillonellales-Selenomonadales	Veillonellaceae	Megasphaera	0.266561	0.683877	2.37833
Bacteria	Firmicutes	Clostridia	Oscillospirales	Oscillospiraceae	Colidextribacter	0.204685	0.68505	-2.07087
Bacteria	Bacteroidota	Bacteroidia	Bacteroidales	Bacteroidaceae	Bacteroides	0.176086	0.685557	1.96726
Bacteria	Firmicutes	Clostridia	Lachnospirales	Lachnospiraceae	[Eubacterium] eligens group	0.223001	0.686047	2.22339
Bacteria	Firmicutes	Clostridia	Lachnospirales	Lachnospiraceae	Agathobacter	0.17926	0.687566	1.54419
Bacteria	Verrucomicrobiota	Verrucomicrobiae	Verrucomicrobiales	Akkermansiaceae	Akkermansia	0.201123	0.688063	-2.28588
Bacteria	Firmicutes	Clostridia	Lachnospirales	Lachnospiraceae	[Eubacterium] ruminantium group	0.343026	0.688849	-1.44493
Bacteria	Firmicutes	Negativicutes	Veillonellales-Selenomonadales	Selenomonadaceae	Megamonas	0.221985	0.694156	2.44801
Bacteria	Firmicutes	Clostridia	Clostridiales	Clostridiaceae	Clostridium sensu stricto 1	0.244057	0.702146	0.818714
Bacteria	Firmicutes	Clostridia	Peptostreptococcales-Tissierellales	Anaerovoracaceae	Family XIII AD3011 group	0.282295	0.710921	-1.23265
Bacteria	Firmicutes	Clostridia	Lachnospirales	Lachnospiraceae	[Ruminococcus] gnavus group	0.301737	0.718953	2.73532
Bacteria	Firmicutes	Clostridia	Lachnospirales	Lachnospiraceae	Lachnospiraceae UCG-010	0.306532	0.719963	-0.526763
Bacteria	Firmicutes	Clostridia	Lachnospirales	Lachnospiraceae	Blautia	0.291182	0.720258	0.704718
Bacteria	Firmicutes	Clostridia	Lachnospirales	Lachnospiraceae	Tyzzerella	0.328806	0.720666	3.13954
Bacteria	Firmicutes	Clostridia	Lachnospirales	Lachnospiraceae	Coprococcus	0.318237	0.721874	-0.902437
Bacteria	Firmicutes	Clostridia	Lachnospirales	Lachnospiraceae	NA	0.349914	0.725534	-0.173607
Bacteria	Firmicutes	Clostridia	Oscillospirales	Ruminococcaceae	Incertae Sedis	0.347677	0.726061	-1.00682
Bacteria	Firmicutes	Clostridia	Lachnospirales	Lachnospiraceae	[Ruminococcus] torques group	0.367692	0.726942	-0.46033
Bacteria	Bacteroidota	Bacteroidia	Bacteroidales	Prevotellaceae	Alloprevotella	0.345239	0.727432	1.8246
Bacteria	Firmicutes	Negativicutes	Acidaminococcales	Acidaminococcaceae	Acidaminococcus	0.359445	0.72757	-2.3973
Bacteria	Firmicutes	Bacilli	Erysipelotrichales	Erysipelatoclostridiaceae	Erysipelotrichaceae UCG-003	0.345675	0.730565	1.75317
Bacteria	Firmicutes	Clostridia	Oscillospirales	Oscillospiraceae	NK4A214 group	0.350552	0.734565	-2.35029
Bacteria	Firmicutes	Clostridia	Lachnospirales	Lachnospiraceae	Lachnospiraceae ND3007 group	0.382495	0.739035	0.904441
Bacteria	Desulfobacterota	Desulfovibrionia	Desulfovibrionales	Desulfovibrionaceae	Bilophila	0.388652	0.741146	-2.26346
Bacteria	Firmicutes	Bacilli	Erysipelotrichales	Erysipelotrichaceae	Holdemanella	0.372718	0.742358	-2.281
Bacteria	Firmicutes	Clostridia	Oscillospirales	Ruminococcaceae	CAG-352	0.385349	0.744946	-0.707524
Bacteria	Firmicutes	Clostridia	Lachnospirales	Lachnospiraceae	Lachnoclostridium	0.411318	0.748151	0.764728
Bacteria	Firmicutes	Clostridia	Oscillospirales	Oscillospiraceae	UCG-005	0.410082	0.753622	-1.78065
Bacteria	Firmicutes	Negativicutes	Veillonellales-Selenomonadales	Veillonellaceae	Dialister	0.424098	0.755812	1.37935
Bacteria	Bacteroidota	Bacteroidia	Bacteroidales	Prevotellaceae	Prevotella	0.455503	0.757285	1.32032
Bacteria	Firmicutes	Bacilli	Lactobacillales	Streptococcaceae	Lactococcus	0.438999	0.75967	1.76315
Bacteria	Proteobacteria	Gammaproteobacteria	Burkholderiales	Sutterellaceae	Sutterella	0.42884	0.760017	2.07135
Bacteria	Firmicutes	Clostridia	Lachnospirales	Lachnospiraceae	Lachnospiraceae NK4A136 group	0.466988	0.760828	0.0826414
Bacteria	Bacteroidota	Bacteroidia	Bacteroidales	Muribaculaceae	NA	0.453608	0.761808	1.1875
Bacteria	Firmicutes	Clostridia	Lachnospirales	Lachnospiraceae	CAG-56	0.437999	0.761936	2.28145
Bacteria	Firmicutes	Clostridia	Lachnospirales	Lachnospiraceae	[Ruminococcus] gauvreauii group	0.481641	0.764081	1.04663
Bacteria	Firmicutes	Clostridia	Lachnospirales	Lachnospiraceae	[Eubacterium] ventriosum group	0.457228	0.765167	2.45103
Bacteria	Bacteroidota	Bacteroidia	Bacteroidales	Barnesiellaceae	Barnesiella	0.458896	0.770024	-1.83041
Bacteria	Firmicutes	Clostridia	Oscillospirales	Oscillospiraceae	UCG-003	0.457263	0.772925	-1.46909
Bacteria	Firmicutes	Negativicutes	Acidaminococcales	Acidaminococcaceae	Phascolarctobacterium	0.491547	0.774519	1.76539
Bacteria	Firmicutes	Clostridia	Lachnospirales	Lachnospiraceae	Lachnospiraceae UCG-001	0.483506	0.774593	-1.86401
Bacteria	Firmicutes	Clostridia	Oscillospirales	Ruminococcaceae	[Eubacterium] siraeum group	0.463549	0.774684	-1.69861
Bacteria	Firmicutes	Clostridia	Lachnospirales	Lachnospiraceae	Lachnospira	0.483209	0.777063	1.95943
Bacteria	Firmicutes	Bacilli	Lactobacillales	Enterococcaceae	Enterococcus	0.476744	0.778384	-1.07439
Bacteria	Actinobacteriota	Actinobacteria	Bifidobacteriales	Bifidobacteriaceae	Bifidobacterium	0.52563	0.779981	0.750469
Bacteria	Firmicutes	Clostridia	Oscillospirales	Ruminococcaceae	Subdoligranulum	0.533499	0.790449	-0.636626
Bacteria	Firmicutes	Clostridia	Peptococcales	Peptococcaceae	Peptococcus	0.509314	0.791639	1.4432
Bacteria	Firmicutes	Clostridia	Oscillospirales	Oscillospiraceae	UCG-002	0.535687	0.793039	-0.747021
Bacteria	Firmicutes	Clostridia	Oscillospirales	Oscillospiraceae	Oscillibacter	0.551197	0.797499	-0.959714
Bacteria	Firmicutes	Bacilli	Erysipelotrichales	Erysipelatoclostridiaceae	Catenibacterium	0.562639	0.80342	-1.19104
Bacteria	Actinobacteriota	Coriobacteriia	Coriobacteriales	Eggerthellaceae	Senegalimassilia	0.569366	0.8102	1.16139
Bacteria	Firmicutes	Clostridia	Oscillospirales	Oscillospiraceae	Intestinimonas	0.589091	0.817499	-1.21252
Bacteria	Firmicutes	Clostridia	Peptostreptococcales-Tissierellales	Anaerovoracaceae	Mogibacterium	0.582983	0.820305	1.17869
Bacteria	Firmicutes	Clostridia	Lachnospirales	Lachnospiraceae	[Eubacterium] hallii group	0.647692	0.834082	0.274308
Bacteria	Firmicutes	Clostridia	Lachnospirales	Lachnospiraceae	Tuzzerella	0.645206	0.841351	-0.745953
Bacteria	Actinobacteriota	Coriobacteriia	Coriobacteriales	Eggerthellaceae	Enterorhabdus	0.652789	0.846095	-0.745657
Bacteria	Bacteroidota	Bacteroidia	Bacteroidales	Tannerellaceae	Parabacteroides	0.673793	0.847432	0.0794515
Bacteria	Bacteroidota	Bacteroidia	Bacteroidales	Rikenellaceae	Alistipes	0.675037	0.850081	-0.244873
Bacteria	Firmicutes	Clostridia	Oscillospirales	Ruminococcaceae	Ruminococcus	0.681433	0.851791	-0.224317
Bacteria	Proteobacteria	Gammaproteobacteria	Burkholderiales	Sutterellaceae	Parasutterella	0.682126	0.855693	-1.02194
Bacteria	Firmicutes	Clostridia	Lachnospirales	Lachnospiraceae	Fusicatenibacter	0.71764	0.864392	-0.565705
Bacteria	Firmicutes	Clostridia	Lachnospirales	Lachnospiraceae	Roseburia	0.7251	0.870161	0.601899
Bacteria	Bacteroidota	Bacteroidia	Bacteroidales	Prevotellaceae	NA	0.707202	0.87098	0.106749
Bacteria	Firmicutes	Clostridia	Lachnospirales	Lachnospiraceae	Sellimonas	0.723616	0.871182	-0.827312
Bacteria	Firmicutes	Clostridia	Oscillospirales	Oscillospiraceae	Flavonifractor	0.751199	0.88436	0.0110243
Bacteria	Firmicutes	Bacilli	Lactobacillales	Lactobacillaceae	Lactobacillus	0.775287	0.89351	0.239118
Bacteria	Bacteroidota	Bacteroidia	Bacteroidales	Prevotellaceae	Paraprevotella	0.776989	0.897228	0.429764
Bacteria	Firmicutes	Clostridia	Lachnospirales	Lachnospiraceae	Lachnospiraceae FCS020 group	0.795926	0.902708	0.613758
Bacteria	Actinobacteriota	Coriobacteriia	Coriobacteriales	Eggerthellaceae	Eggerthella	0.798209	0.906991	0.660085
Bacteria	Firmicutes	Bacilli	Erysipelotrichales	Erysipelotrichaceae	Faecalitalea	0.819021	0.913793	0.156879
Bacteria	Firmicutes	Bacilli	Erysipelotrichales	Erysipelatoclostridiaceae	Erysipelatoclostridium	0.837945	0.923252	0.208637
Bacteria	Firmicutes	Clostridia	Monoglobales	Monoglobaceae	Monoglobus	0.848572	0.928487	0.0384323
Bacteria	Firmicutes	Clostridia	Christensenellales	Christensenellaceae	Christensenellaceae R-7 group	0.891349	0.947089	-0.0138729
Bacteria	Actinobacteriota	Coriobacteriia	Coriobacteriales	Coriobacteriaceae	Collinsella	0.930734	0.968295	-0.374373
Bacteria	Firmicutes	Clostridia	Oscillospirales	Ruminococcaceae	Faecalibacterium	0.963355	0.981336	0.45399
