# Supplementary material for: The East Asian gut microbiome is distinct from colocalized White subjects and connected to metabolic health
Source: eLife journal article supplement (doi:10.7554/elife.70349), 2021-10-07
Supplement: supp [file elife-70349-supp-v2.zip › elife_poa_e70349_Figure_6_source_data_1.xlsx]

## Sheet: Figure 6A
SampleID	Ethnicity	BMI classification	Longitude	Latitude
OB026	EA	Lean	-122.441	37.7225
OB027	EA	Lean	-122.441	37.7225
OB030	EA	Lean	-122.087	37.3785
OB035	EA	Lean	-122.027	37.7105
OB040	EA	Lean	-122.498	37.7432
OB041	EA	Lean	-121.868	37.6436
OB051	EA	Lean	-122.26	38.0067
OB057	EA	Lean	-122.458	37.884
OB070	EA	Lean	-122.438	37.7401
OB078	EA	Lean	-122.475	37.7597
OB084	EA	Lean	-122.316	37.5794
OB012	EA	Obese	-122.41	37.7726
OB021	EA	Obese	-122.41	37.7726
OB022	EA	Obese	-122.418	37.6532
OB024	EA	Obese	-122.418	37.7486
OB043	EA	Obese	-122.486	37.68
OB055	EA	Obese	-122.146	37.7937
OB072	EA	Obese	-122.498	37.7432
OB079	EA	Obese	-122.464	37.7346
OB085	EA	Obese	-122.421	37.793
OB020	W	Lean	-122.42	37.78
OB042	W	Lean	-122.418	37.5959
OB045	W	Lean	-122.486	37.7181
OB059	W	Lean	-122.444	37.7717
OB063	W	Lean	-122.4	37.7898
OB064	W	Lean	-122.475	37.7597
OB066	W	Lean	-122.441	37.7225
OB068	W	Lean	-122.475	37.7597
OB069	W	Lean	-122.433	37.7561
OB081	W	Lean	-122.571	37.9061
OB082	W	Lean	-122.418	37.7486
OB006	W	Obese	-122.41	37.806
OB008	W	Obese	-121.833	37.5868
OB011	W	Obese	-122.475	37.7597
OB014	W	Obese	-122.345	37.9759
OB018	W	Obese	-122.418	37.7486
OB028	W	Obese	-122.797	38.441
OB036	W	Obese	-122.444	37.7717
OB039	W	Obese	-122.41	37.7726
OB046	W	Obese	-122.438	37.7878
OB050	W	Obese	-122.384	37.7304
OB056	W	Obese	-121.936	38.3286
OB067	W	Obese	-122.486	37.68
OB071	W	Obese	-122.146	37.7937

## Sheet: Figure 6C,E,F
SampleID	Ethnicity	BMI classification	PCoA Axis 1	Distance to SF Center (miles)	Duration of residence (years)
OB026	EA	Lean	-12.9471	3.80037	0
OB027	EA	Lean	-12.8462	3.80037	15
OB030	EA	Lean	13.2424	32.8775	13
OB035	EA	Lean	19.6217	21.9496	59
OB040	EA	Lean	20.6466	4.80966	64
OB041	EA	Lean	-8.82865	31.5579	19
OB051	EA	Lean	9.29043	18.2166	17
OB057	EA	Lean	-5.16932	7.81461	18
OB070	EA	Lean	-3.34683	2.6119	3
OB078	EA	Lean	-5.6231	3.2199	9
OB084	EA	Lean	1.24432	14.6198	27
OB020	W	Lean	-1.15489	0.353264	62
OB042	W	Lean	2.54006	12.3454	18
OB045	W	Lean	-24.4883	5.36343	27
OB059	W	Lean	-8.41528	1.35868	57
OB063	W	Lean	-21.1195	1.47284	5
OB064	W	Lean	-15.4507	3.2199	6
OB066	W	Lean	-8.53191	3.80037	0
OB068	W	Lean	-24.063	3.2199	24
OB069	W	Lean	-14.2412	1.48091	0
OB081	W	Lean	-16.3507	12.279	12
OB082	W	Lean	-12.198	1.81586	21
OB012	EA	Obese	1.51354	0.542109	42
OB021	EA	Obese	27.858	0.542109	35
OB022	EA	Obese	31.6774	8.39409	42
OB024	EA	Obese	2.01497	1.81586	2
OB043	EA	Obese	-9.94082	7.50237	37
OB055	EA	Obese	-10.9147	15.0088	8
OB072	EA	Obese	2.46425	4.80966	59
OB079	EA	Obese	-21.5304	3.68698	21
OB085	EA	Obese	4.64973	1.25093	30
OB006	W	Obese	-2.66582	2.20606	3
OB008	W	Obese	10.2051	34.6372	NA
OB011	W	Obese	7.05562	3.2199	41
OB014	W	Obese	-16.253	14.4509	10
OB018	W	Obese	0.0684254	1.81586	39
OB028	W	Obese	30.5731	50.3414	17
OB036	W	Obese	-1.17572	1.35868	25
OB039	W	Obese	-0.324772	0.542109	33
OB046	W	Obese	4.24131	1.35946	52
OB050	W	Obese	19.1024	3.61662	29
OB056	W	Obese	14.2509	46.4083	NA
OB067	W	Obese	-7.91977	7.50237	23
OB071	W	Obese	-2.54488	15.0088	5
