# Supplementary material for: The East Asian gut microbiome is distinct from colocalized White subjects and connected to metabolic health
Source: eLife journal article supplement (doi:10.7554/elife.70349), 2021-10-07

**A**

**Experiment: LFPP1**  
(n=2 donors, 1 EA and 1 W)

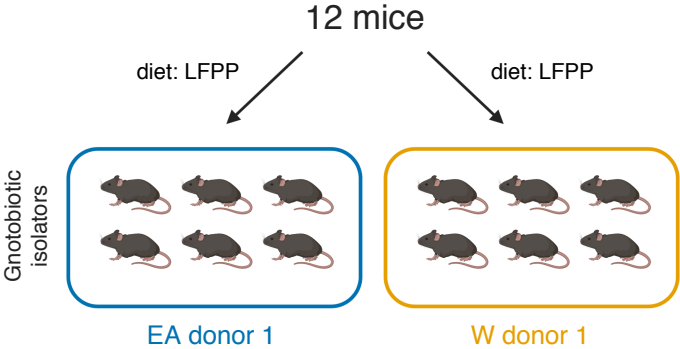**B**

**Experiment: LFPP2**  
(n=2 donors, 1 EA and 1 W)

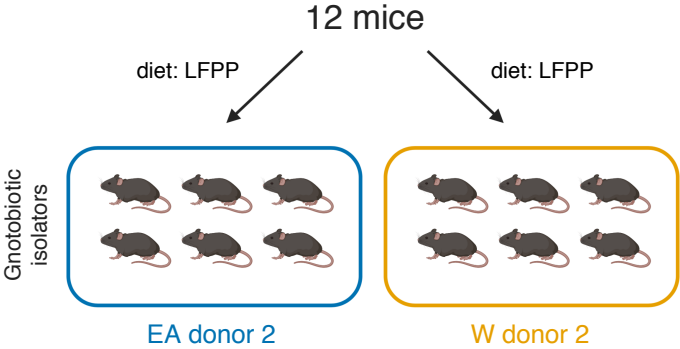**C**

**Experiment: HFHS**  
(n=10 donors, 5 EA and 5 W)

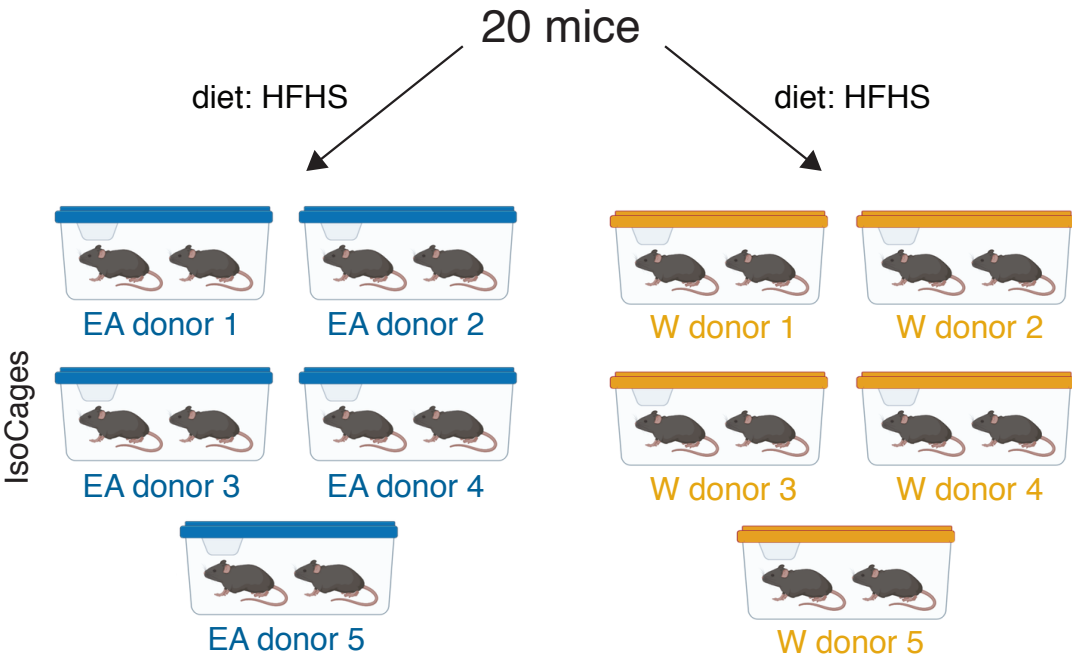

Supplement: supp [file elife-70349-supp-v2.zip › elife_poa_e70349_Figure_7_figure_supplement_1.pdf]
