# Supplementary material for: The East Asian gut microbiome is distinct from colocalized White subjects and connected to metabolic health
Source: eLife journal article supplement (doi:10.7554/elife.70349), 2021-10-07
Supplement: supp [file elife-70349-supp-v2.zip › elife_poa_e70349_Figure_7_source_data_1.xlsx]

## Sheet: Figure 7A
Sample Type	Mouse ID	Donor	Experiment	Ethnicity	Axis 1	Axis 2
Recipient	O1-1	OB051	LFPP1	EA	-15.1245	-7.07854
Recipient	O1-2	OB051	LFPP1	EA	-13.6415	-6.98781
Recipient	O1-3	OB051	LFPP1	EA	-15.7604	-7.10054
Recipient	O2-4	OB051	LFPP1	EA	-14.7264	-6.0601
Recipient	O2-5	OB051	LFPP1	EA	-15.0986	-6.28352
Recipient	O2-6	OB051	LFPP1	EA	-15.7771	-6.82516
Recipient	8-1	OB084	LFPP2	EA	10.7615	2.0572
Recipient	8-2	OB084	LFPP2	EA	10.2983	0.996603
Recipient	8-3	OB084	LFPP2	EA	-10.6558	12.4409
Recipient	8-4	OB084	LFPP2	EA	-9.10021	12.0071
Recipient	8-5	OB084	LFPP2	EA	-9.90895	14.7154
Recipient	8-6	OB084	LFPP2	EA	-11.4264	15.0331
Recipient	M1-1	OB064	LFPP1	W	9.09119	-1.1154
Recipient	M1-2	OB064	LFPP1	W	11.2582	-0.701696
Recipient	M1-3	OB064	LFPP1	W	11.9063	-2.67197
Recipient	M2-4	OB064	LFPP1	W	9.9022	0.572727
Recipient	M2-5	OB064	LFPP1	W	10.5899	1.69843
Recipient	M2-6	OB064	LFPP1	W	10.4175	0.53052
Recipient	7-1	OB069	LFPP2	W	4.87297	-2.8667
Recipient	7-2	OB069	LFPP2	W	-0.561689	-7.99212
Recipient	7-3	OB069	LFPP2	W	9.23342	-1.21325
Recipient	7-4	OB069	LFPP2	W	11.4841	-0.641018
Recipient	7-5	OB069	LFPP2	W	11.8836	-2.77964
Recipient	7-6	OB069	LFPP2	W	10.0825	0.265548

## Sheet: Figure 7B
Sample Type	Mouse ID	Donor	Experiment	Ethnicity	Axis 1	Axis 2
Donor	NA	OB051	LFPP1	EA	2.82949	11.1803
Donor	NA	OB084	LFPP2	EA	6.05938	13.1501
Recipient	O1-1	OB051	LFPP1	EA	15.0932	0.0052903
Recipient	O1-2	OB051	LFPP1	EA	13.5843	-0.288088
Recipient	O1-3	OB051	LFPP1	EA	15.7164	-0.409024
Recipient	O2-4	OB051	LFPP1	EA	14.6779	0.454239
Recipient	O2-5	OB051	LFPP1	EA	15.0649	0.587843
Recipient	O2-6	OB051	LFPP1	EA	15.7414	1.36926
Recipient	8-1	OB084	LFPP2	EA	-10.7797	-4.34076
Recipient	8-2	OB084	LFPP2	EA	-10.2985	-3.21214
Recipient	8-3	OB084	LFPP2	EA	10.5975	-8.15419
Recipient	8-4	OB084	LFPP2	EA	9.03548	-8.44958
Recipient	8-5	OB084	LFPP2	EA	9.8543	-10.2486
Recipient	8-6	OB084	LFPP2	EA	11.3308	-11.7804
Donor	NA	OB064	LFPP1	W	-5.64177	10.2091
Donor	NA	OB069	LFPP2	W	-2.34708	16.6428
Recipient	M1-1	OB064	LFPP1	W	-9.12461	-3.86992
Recipient	M1-2	OB064	LFPP1	W	-11.2849	-2.39682
Recipient	M1-3	OB064	LFPP1	W	-12.0005	-3.63804
Recipient	M2-4	OB064	LFPP1	W	-9.89845	-2.26422
Recipient	M2-5	OB064	LFPP1	W	-10.6021	-3.91271
Recipient	M2-6	OB064	LFPP1	W	-10.4035	-1.88585
Recipient	7-1	OB069	LFPP2	W	-5.07283	10.0818
Recipient	7-2	OB069	LFPP2	W	0.714035	13.2032
Recipient	7-3	OB069	LFPP2	W	-9.27178	-3.91846
Recipient	7-4	OB069	LFPP2	W	-11.5114	-2.28584
Recipient	7-5	OB069	LFPP2	W	-11.98	-3.50797
Recipient	7-6	OB069	LFPP2	W	-10.0821	-2.32134

## Sheet: Figure 7C
Sample Type	Mouse ID	Donor	Experiment	Ethnicity	Richness
Recipient	O1-1	OB051	LFPP1	EA	101
Recipient	O1-2	OB051	LFPP1	EA	84
Recipient	O1-3	OB051	LFPP1	EA	105
Recipient	O2-4	OB051	LFPP1	EA	106
Recipient	O2-5	OB051	LFPP1	EA	102
Recipient	O2-6	OB051	LFPP1	EA	113
Recipient	8-1	OB084	LFPP2	EA	153
Recipient	8-2	OB084	LFPP2	EA	152
Recipient	8-3	OB084	LFPP2	EA	73
Recipient	8-4	OB084	LFPP2	EA	73
Recipient	8-5	OB084	LFPP2	EA	71
Recipient	8-6	OB084	LFPP2	EA	73
Recipient	M1-1	OB064	LFPP1	W	157
Recipient	M1-2	OB064	LFPP1	W	160
Recipient	M1-3	OB064	LFPP1	W	144
Recipient	M2-4	OB064	LFPP1	W	159
Recipient	M2-5	OB064	LFPP1	W	156
Recipient	M2-6	OB064	LFPP1	W	140
Recipient	7-1	OB069	LFPP2	W	184
Recipient	7-2	OB069	LFPP2	W	118
Recipient	7-3	OB069	LFPP2	W	156
Recipient	7-4	OB069	LFPP2	W	152
Recipient	7-5	OB069	LFPP2	W	144
Recipient	7-6	OB069	LFPP2	W	161

## Sheet: Figure 7D
Kingdom	Phylum	Class	Order	Family	Genus	p-value	FDR	Log2 fold difference (EA/W)
Bacteria	Firmicutes	Clostridia	Lachnospirales	Lachnospiraceae	Lachnoclostridium	4.35e-06	0.00032	3.03122
Bacteria	Firmicutes	Bacilli	Erysipelotrichales	Erysipelotrichaceae	[Clostridium] innocuum group	1.51e-05	0.000424	3.93855
Bacteria	Bacteroidota	Bacteroidia	Bacteroidales	Bacteroidaceae	Bacteroides	2.6e-05	0.000489	3.14231
Bacteria	Firmicutes	Clostridia	Lachnospirales	Lachnospiraceae	Eisenbergiella	3.11e-05	0.000496	3.08453
Bacteria	Firmicutes	Clostridia	Lachnospirales	Lachnospiraceae	Blautia	3.47e-05	0.000508	2.8802
Bacteria	Bacteroidota	Bacteroidia	Bacteroidales	Tannerellaceae	Parabacteroides	5.71e-05	0.000608	2.46313
Bacteria	Proteobacteria	Gammaproteobacteria	Burkholderiales	Sutterellaceae	Parasutterella	8.92e-05	0.000749	2.71914
Bacteria	Firmicutes	Clostridia	Oscillospirales	Oscillospiraceae	Flavonifractor	0.000111	0.000846	3.0313
Bacteria	Firmicutes	Bacilli	Erysipelotrichales	Erysipelotrichaceae	Holdemania	0.000151	0.000938	4.4072
Bacteria	Firmicutes	Clostridia	Lachnospirales	Lachnospiraceae	Marvinbryantia	0.000156	0.00103401	-9.20874
Bacteria	Firmicutes	Clostridia	Oscillospirales	Ruminococcaceae	UBA1819	0.000258	0.001305	6.98152
Bacteria	Firmicutes	Clostridia	Peptostreptococcales-Tissierellales	Peptostreptococcaceae	Romboutsia	0.000264	0.0014096	-7.21876
Bacteria	Actinobacteriota	Coriobacteriia	Coriobacteriales	Eggerthellaceae	Adlercreutzia	0.000363	0.00181582	2.12528
Bacteria	Firmicutes	Clostridia	Lachnospirales	Lachnospiraceae	[Ruminococcus] torques group	0.000425	0.00204942	2.94196
Bacteria	Firmicutes	Clostridia	Oscillospirales	Oscillospiraceae	Oscillibacter	0.000521	0.00236	2.8597
Bacteria	Firmicutes	Clostridia	Oscillospirales	Oscillospiraceae	NA	0.000892	0.00326286	-5.19276
Bacteria	Proteobacteria	Alphaproteobacteria	Rhodospirillales	NA	NA	0.000971	0.00355552	-7.07414
Bacteria	Firmicutes	Clostridia	Oscillospirales	Ruminococcaceae	NA	0.00132812	0.00410596	3.54759
Bacteria	Bacteroidota	Bacteroidia	Bacteroidales	Muribaculaceae	NA	0.00124879	0.00443866	-6.86906
Bacteria	Bacteroidota	Bacteroidia	Bacteroidales	Barnesiellaceae	Barnesiella	0.00148025	0.00491758	-5.48716
Bacteria	Bacteroidota	Bacteroidia	Bacteroidales	Marinifilaceae	Butyricimonas	0.00276839	0.00768315	-5.513
Bacteria	Firmicutes	Bacilli	Erysipelotrichales	Erysipelatoclostridiaceae	Erysipelatoclostridium	0.00303143	0.0084619	2.51379
Bacteria	Firmicutes	Clostridia	Lachnospirales	Lachnospiraceae	[Eubacterium] hallii group	0.00342026	0.00988684	-6.27479
Bacteria	Firmicutes	Clostridia	Lachnospirales	Lachnospiraceae	[Ruminococcus] gauvreauii group	0.00502369	0.0111271	-4.95689
Bacteria	Firmicutes	Bacilli	Erysipelotrichales	Erysipelotrichaceae	Faecalitalea	0.00544473	0.0121012	7.45395
Bacteria	Firmicutes	Clostridia	Lachnospirales	Lachnospiraceae	Sellimonas	0.00912179	0.0182789	7.78486
Bacteria	Firmicutes	Clostridia	Oscillospirales	Oscillospiraceae	Oscillospira	0.00894378	0.0187654	-4.64023
Bacteria	Desulfobacterota	Desulfovibrionia	Desulfovibrionales	Desulfovibrionaceae	Bilophila	0.00954374	0.0202756	8.31936
Bacteria	Bacteroidota	Bacteroidia	Bacteroidales	Rikenellaceae	Alistipes	0.00917943	0.0216741	0.743575
Bacteria	Firmicutes	Clostridia	Lachnospirales	Lachnospiraceae	Lachnospiraceae FCS020 group	0.0107396	0.0229834	-3.63243
Bacteria	Firmicutes	Clostridia	Lachnospirales	Lachnospiraceae	Tuzzerella	0.012153	0.0238296	7.91642
Bacteria	Firmicutes	Clostridia	Lachnospirales	Lachnospiraceae	Lachnospiraceae UCG-006	0.0151986	0.0299372	-6.52159
Bacteria	Firmicutes	Clostridia	Peptococcales	Peptococcaceae	NA	0.0157537	0.0307969	-6.20258
Bacteria	Firmicutes	Clostridia	Peptostreptococcales-Tissierellales	Anaerovoracaceae	[Eubacterium] nodatum group	0.0204245	0.0387106	-5.64025
Bacteria	Fusobacteriota	Fusobacteriia	Fusobacteriales	Fusobacteriaceae	Fusobacterium	0.02556	0.0474462	4.36604
Bacteria	Firmicutes	Clostridia	Oscillospirales	Oscillospiraceae	UCG-002	0.0240734	0.047643	-2.3985
Bacteria	Firmicutes	Clostridia	Oscillospirales	Butyricicoccaceae	Butyricicoccus	0.0239754	0.0485473	2.2324
Bacteria	Firmicutes	Clostridia	Oscillospirales	Ruminococcaceae	Faecalibacterium	0.0267491	0.0534347	-7.35544
Bacteria	Firmicutes	Clostridia	Oscillospirales	Ruminococcaceae	[Eubacterium] siraeum group	0.0331768	0.0587795	-6.10946
Bacteria	Firmicutes	Clostridia	Oscillospirales	Oscillospiraceae	Colidextribacter	0.0332114	0.0627682	1.81459
Bacteria	Cyanobacteria	Vampirivibrionia	Gastranaerophilales	NA	NA	0.0365096	0.0636425	4.02847
Bacteria	Firmicutes	Clostridia	Lachnospirales	Lachnospiraceae	UC5-1-2E3	0.0391161	0.0639962	-4.09676
Bacteria	Firmicutes	Clostridia	Oscillospirales	[Eubacterium] coprostanoligenes group	NA	0.0405499	0.0675794	-4.90294
Bacteria	Firmicutes	Clostridia	Lachnospirales	Lachnospiraceae	[Eubacterium] ventriosum group	0.042921	0.0715417	-3.3416
Bacteria	Firmicutes	Clostridia	Lachnospirales	Lachnospiraceae	Anaerostipes	0.0504455	0.0823022	-6.01632
Bacteria	Firmicutes	Clostridia	Lachnospirales	Lachnospiraceae	Lachnospiraceae ND3007 group	0.0553911	0.0896008	-3.85142
Bacteria	Verrucomicrobiota	Verrucomicrobiae	Verrucomicrobiales	Akkermansiaceae	Akkermansia	0.0665809	0.109161	3.40633
Bacteria	Firmicutes	Clostridia	Lachnospirales	Lachnospiraceae	NA	0.0712351	0.11952	-0.236231
Bacteria	Firmicutes	Clostridia	Oscillospirales	Butyricicoccaceae	UCG-009	0.073994	0.123116	-0.768419
Bacteria	Actinobacteriota	Coriobacteriia	Coriobacteriales	Eggerthellaceae	Gordonibacter	0.0852628	0.125908	1.52692
Bacteria	Proteobacteria	Gammaproteobacteria	Enterobacterales	Enterobacteriaceae	Escherichia-Shigella	0.0814069	0.126634	3.58291
Bacteria	Firmicutes	Clostridia	Lachnospirales	Lachnospiraceae	[Eubacterium] xylanophilum group	0.0886611	0.13544	-4.9662
Bacteria	Firmicutes	Clostridia	Lachnospirales	Lachnospiraceae	Lachnospiraceae NK4A136 group	0.123865	0.183091	3.33088
Bacteria	Firmicutes	Clostridia	Oscillospirales	Ruminococcaceae	Negativibacillus	0.138038	0.208114	-0.139711
Bacteria	Firmicutes	Clostridia	Lachnospirales	Lachnospiraceae	Dorea	0.164406	0.233838	2.85973
Bacteria	Firmicutes	Clostridia	Peptostreptococcales-Tissierellales	Peptostreptococcaceae	Intestinibacter	0.25041	0.326274	2.83919
Bacteria	Firmicutes	Clostridia	Lachnospirales	Lachnospiraceae	Hungatella	0.2636	0.348219	3.17116
Bacteria	Actinobacteriota	Actinobacteria	Bifidobacteriales	Bifidobacteriaceae	Bifidobacterium	0.272378	0.362384	2.5202
Bacteria	Firmicutes	Clostridia	Lachnospirales	Lachnospiraceae	GCA-900066575	0.28857	0.371422	-1.29318
Bacteria	Bacteroidota	Bacteroidia	Bacteroidales	Marinifilaceae	Odoribacter	0.314048	0.390269	2.28259
Bacteria	Firmicutes	Clostridia	Lachnospirales	Lachnospiraceae	[Eubacterium] fissicatena group	0.310245	0.390422	2.92451
Bacteria	Firmicutes	Clostridia	Oscillospirales	Ruminococcaceae	Incertae Sedis	0.331036	0.437559	0.673971
Bacteria	Firmicutes	Clostridia	Oscillospirales	Ruminococcaceae	CAG-352	0.37292	0.45157	2.17963
Bacteria	Firmicutes	Bacilli	Erysipelotrichales	Erysipelatoclostridiaceae	Candidatus Stoquefichus	0.394876	0.483489	-1.52823
Bacteria	Firmicutes	Clostridia	Clostridia UCG-014	NA	NA	0.470607	0.546854	1.85821
Bacteria	Firmicutes	Clostridia	Lachnospirales	Lachnospiraceae	Agathobacter	0.508105	0.58956	-0.33321
Bacteria	Firmicutes	Negativicutes	Acidaminococcales	Acidaminococcaceae	Phascolarctobacterium	0.481597	0.589614	1.19686
Bacteria	Firmicutes	Clostridia	Lachnospirales	Lachnospiraceae	Murimonas	0.509618	0.599183	1.58918
Bacteria	Firmicutes	Clostridia	Lachnospirales	Lachnospiraceae	Coprococcus	0.5036	0.601272	-0.399195
Bacteria	Firmicutes	Clostridia	Lachnospirales	Lachnospiraceae	[Eubacterium] ruminantium group	0.521184	0.60328	1.56456
Bacteria	Firmicutes	Clostridia	Lachnospirales	Lachnospiraceae	Catenibacillus	0.544285	0.627809	-0.512028
Bacteria	Firmicutes	Bacilli	Lactobacillales	Streptococcaceae	Streptococcus	0.603712	0.685943	1.62746
Bacteria	Firmicutes	Clostridia	Oscillospirales	Ruminococcaceae	Pygmaiobacter	0.632966	0.710883	-0.109563
Bacteria	Firmicutes	Clostridia	Clostridiales	Clostridiaceae	Clostridium sensu stricto 1	0.638641	0.714501	1.54858
Bacteria	Firmicutes	Clostridia	Lachnospirales	Lachnospiraceae	Fusicatenibacter	0.648352	0.731946	-0.179644
Bacteria	Bacteroidota	Bacteroidia	Bacteroidales	Barnesiellaceae	Coprobacter	0.659427	0.741752	1.52874
Bacteria	Firmicutes	Clostridia	Lachnospirales	Lachnospiraceae	Lachnospiraceae UCG-009	0.668921	0.745107	1.44689
Bacteria	Firmicutes	Clostridia	Oscillospirales	Oscillospiraceae	Intestinimonas	0.704027	0.776169	0.496705
Bacteria	Firmicutes	Clostridia	Lachnospirales	Lachnospiraceae	Frisingicoccus	0.735621	0.802873	1.28297
Bacteria	Actinobacteriota	Coriobacteriia	Coriobacteriales	Coriobacteriaceae	Collinsella	0.756083	0.81896	0.0792216
Bacteria	Firmicutes	Clostridia	Oscillospirales	Ruminococcaceae	Subdoligranulum	0.783021	0.839491	0.643772
Bacteria	Firmicutes	Clostridia	Christensenellales	Christensenellaceae	Christensenellaceae R-7 group	0.784096	0.839777	1.48849
Bacteria	Firmicutes	Clostridia	Oscillospirales	Ruminococcaceae	Ruminococcus	0.838874	0.884894	0.944997
Bacteria	Firmicutes	Clostridia	Monoglobales	Monoglobaceae	Monoglobus	0.842483	0.8873	0.149514

## Sheet: Figure 7E
Sample Type	Mouse ID	Donor	Experiment	Ethnicity	Bacteroides abundance (CLR)
Recipient	O1-1	OB051	LFPP1	EA	11.8183
Recipient	O1-2	OB051	LFPP1	EA	11.7284
Recipient	O1-3	OB051	LFPP1	EA	11.7603
Recipient	O2-4	OB051	LFPP1	EA	11.815
Recipient	O2-5	OB051	LFPP1	EA	11.8505
Recipient	O2-6	OB051	LFPP1	EA	11.8224
Recipient	8-1	OB084	LFPP2	EA	10.2556
Recipient	8-2	OB084	LFPP2	EA	9.97001
Recipient	8-3	OB084	LFPP2	EA	12.6558
Recipient	8-4	OB084	LFPP2	EA	12.4693
Recipient	8-5	OB084	LFPP2	EA	12.865
Recipient	8-6	OB084	LFPP2	EA	13.1781
Recipient	M1-1	OB064	LFPP1	W	10.5064
Recipient	M1-2	OB064	LFPP1	W	10.1647
Recipient	M1-3	OB064	LFPP1	W	10.5266
Recipient	M2-4	OB064	LFPP1	W	9.71815
Recipient	M2-5	OB064	LFPP1	W	10.0931
Recipient	M2-6	OB064	LFPP1	W	9.50378
Recipient	7-1	OB069	LFPP2	W	8.48663
Recipient	7-2	OB069	LFPP2	W	8.19158
Recipient	7-3	OB069	LFPP2	W	10.4064
Recipient	7-4	OB069	LFPP2	W	9.94729
Recipient	7-5	OB069	LFPP2	W	10.5898
Recipient	7-6	OB069	LFPP2	W	9.71493

## Sheet: Figure 7F
Sample Type	Mouse ID	Donor	Experiment	Ethnicity	Axis 1	Axis 2
Recipient	B_3	OB051	HFHS	EA	4.71863	6.86306
Recipient	K_5	OB051	HFHS	EA	7.06004	-5.10755
Recipient	D_7	OB084	HFHS	EA	-6.65472	13.4791
Recipient	D_8	OB084	HFHS	EA	-6.73408	12.1859
Recipient	F_3	OB026	HFHS	EA	-9.49738	11.9276
Recipient	F_4	OB026	HFHS	EA	-1.01457	10.0265
Recipient	H_7	OB070	HFHS	EA	-17.5513	-12.5349
Recipient	H_8	OB070	HFHS	EA	-16.8259	-8.26358
Recipient	J_3	OB078	HFHS	EA	8.12468	7.4626
Recipient	J_4	OB078	HFHS	EA	9.85309	5.8415
Recipient	A_1	OB064	HFHS	W	-13.5921	-5.76952
Recipient	A_2	OB064	HFHS	W	-13.3473	-4.89986
Recipient	C_5	OB069	HFHS	W	6.84839	-6.46083
Recipient	C_6	OB069	HFHS	W	3.53164	-3.22206
Recipient	E_1	OB063	HFHS	W	9.35248	-9.32301
Recipient	E_2	OB063	HFHS	W	7.46565	-8.48059
Recipient	G_5	OB045	HFHS	W	8.78382	-9.73286
Recipient	G_6	OB045	HFHS	W	9.98029	-11.296
Recipient	I_1	OB081	HFHS	W	4.60902	8.60614
Recipient	I_2	OB081	HFHS	W	4.88952	8.69833

## Sheet: Figure 7G
Sample Type	Mouse ID	Donor	Experiment	Ethnicity	Axis 1	Axis 2
Donor	NA	OB051	HFHS	EA	10.028	9.47804
Donor	NA	OB084	HFHS	EA	13.901	5.67264
Donor	NA	OB026	HFHS	EA	13.8404	3.65597
Donor	NA	OB070	HFHS	EA	5.66302	4.32
Donor	NA	OB078	HFHS	EA	24.4054	9.90524
Donor	NA	OB051	HFHS	EA	14.7558	-6.13965
Recipient	B_3	OB051	HFHS	EA	-5.79899	7.68014
Recipient	D_7	OB084	HFHS	EA	-12.4484	13.1293
Recipient	D_8	OB084	HFHS	EA	-13.291	11.8495
Recipient	F_3	OB026	HFHS	EA	-15.1772	10.6934
Recipient	F_4	OB026	HFHS	EA	-5.44448	8.97632
Recipient	H_7	OB070	HFHS	EA	-20.8474	-11.8448
Recipient	H_8	OB070	HFHS	EA	-19.2211	-7.8194
Recipient	J_3	OB078	HFHS	EA	-5.09762	6.14615
Recipient	J_4	OB078	HFHS	EA	-1.9535	4.36713
Recipient	K_5	OB051	HFHS	EA	-1.06004	-6.10349
Donor	NA	OB064	HFHS	W	11.3208	-0.805527
Donor	NA	OB069	HFHS	W	18.987	-5.22806
Donor	NA	OB063	HFHS	W	7.99653	3.91052
Donor	NA	OB045	HFHS	W	18.2606	-13.6712
Donor	NA	OB081	HFHS	W	17.9062	-1.91745
Recipient	A_1	OB064	HFHS	W	-17.9888	-5.82289
Recipient	A_2	OB064	HFHS	W	-18.0307	-5.68643
Recipient	C_5	OB069	HFHS	W	-2.95567	-6.50223
Recipient	C_6	OB069	HFHS	W	-5.0557	-2.29268
Recipient	E_1	OB063	HFHS	W	-0.826036	-9.07983
Recipient	E_2	OB063	HFHS	W	-2.0681	-8.46438
Recipient	G_5	OB045	HFHS	W	-0.308741	-10.7124
Recipient	G_6	OB045	HFHS	W	1.31041	-11.9659
Recipient	I_1	OB081	HFHS	W	-5.71568	6.91625
Recipient	I_2	OB081	HFHS	W	-5.08613	7.35577

## Sheet: Figure 7H
Sample Type	Mouse ID	Donor	Experiment	Ethnicity	Richness
Recipient	B_3	OB051	HFHS	EA	82
Recipient	K_5	OB051	HFHS	EA	92
Recipient	D_7	OB084	HFHS	EA	68
Recipient	D_8	OB084	HFHS	EA	65
Recipient	F_3	OB026	HFHS	EA	48
Recipient	F_4	OB026	HFHS	EA	37
Recipient	H_7	OB070	HFHS	EA	76
Recipient	H_8	OB070	HFHS	EA	79
Recipient	J_3	OB078	HFHS	EA	91
Recipient	J_4	OB078	HFHS	EA	83
Recipient	A_1	OB064	HFHS	W	98
Recipient	A_2	OB064	HFHS	W	89
Recipient	C_5	OB069	HFHS	W	123
Recipient	C_6	OB069	HFHS	W	120
Recipient	E_1	OB063	HFHS	W	120
Recipient	E_2	OB063	HFHS	W	119
Recipient	G_5	OB045	HFHS	W	79
Recipient	G_6	OB045	HFHS	W	77
Recipient	I_1	OB081	HFHS	W	94
Recipient	I_2	OB081	HFHS	W	88

## Sheet: Figure 7I
Kingdom	Phylum	Class	Order	Family	Genus	p-value	FDR	Log2 fold difference (EA/W)
Bacteria	Firmicutes	Clostridia	Peptostreptococcales-Tissierellales	Anaerovoracaceae	[Eubacterium] nodatum group	0.00223994	0.0431166	-7.3601
Bacteria	Firmicutes	Clostridia	Eubacteriales	Eubacteriaceae	Eubacterium	0.00748938	0.0633928	7.97083
Bacteria	Firmicutes	Clostridia	Oscillospirales	Ruminococcaceae	UBA1819	0.00476733	0.0801036	1.68522
Bacteria	Firmicutes	Clostridia	Oscillospirales	Ruminococcaceae	Paludicola	0.0053363	0.0821458	-6.24386
Bacteria	Bacteroidota	Bacteroidia	Bacteroidales	Tannerellaceae	Parabacteroides	0.00723505	0.0946974	1.65311
Bacteria	Bacteroidota	Bacteroidia	Bacteroidales	Bacteroidaceae	Bacteroides	0.0109316	0.108568	1.90331
Bacteria	Firmicutes	Negativicutes	Acidaminococcales	Acidaminococcaceae	Phascolarctobacterium	0.0282801	0.175606	-4.66442
Bacteria	Firmicutes	Clostridia	Lachnospirales	Lachnospiraceae	Lachnoclostridium	0.0273276	0.176515	0.86651
Bacteria	Firmicutes	Clostridia	Lachnospirales	Lachnospiraceae	[Ruminococcus] gauvreauii group	0.0394908	0.177832	4.55458
Bacteria	Actinobacteriota	Coriobacteriia	Coriobacteriales	Eggerthellaceae	Gordonibacter	0.04472	0.18507	4.80411
Bacteria	Firmicutes	Clostridia	Lachnospirales	Lachnospiraceae	[Ruminococcus] torques group	0.0416845	0.217101	2.61581
Bacteria	Firmicutes	Clostridia	Oscillospirales	Oscillospiraceae	Flavonifractor	0.047103	0.227039	1.00625
Bacteria	Bacteroidota	Bacteroidia	Bacteroidales	Barnesiellaceae	Barnesiella	0.0554314	0.227639	-5.80245
Bacteria	Firmicutes	Clostridia	Lachnospirales	Lachnospiraceae	Dorea	0.0742772	0.265818	3.90373
Bacteria	Firmicutes	Clostridia	Oscillospirales	Oscillospiraceae	NA	0.0832889	0.276928	-3.75897
Bacteria	Firmicutes	Clostridia	Lachnospirales	Lachnospiraceae	Marvinbryantia	0.0993092	0.283876	-4.22921
Bacteria	Firmicutes	Clostridia	Clostridiales	Clostridiaceae	Clostridium sensu stricto 13	0.0921481	0.294974	4.78919
Bacteria	Firmicutes	Clostridia	Lachnospirales	Lachnospiraceae	Coprococcus	0.120663	0.335499	-3.97857
Bacteria	Firmicutes	Clostridia	Peptostreptococcales-Tissierellales	Peptostreptococcaceae	Intestinibacter	0.166485	0.390423	2.46344
Bacteria	Firmicutes	Clostridia	Peptostreptococcales-Tissierellales	Peptostreptococcaceae	Paraclostridium	0.169267	0.395638	2.45241
Bacteria	Firmicutes	Clostridia	Lachnospirales	Lachnospiraceae	Tuzzerella	0.169453	0.407408	3.43808
Bacteria	Firmicutes	Bacilli	Erysipelotrichales	Erysipelotrichaceae	Holdemania	0.147347	0.408107	0.920743
Bacteria	Firmicutes	Clostridia	Oscillospirales	Ruminococcaceae	Anaerotruncus	0.1826	0.414113	3.16198
Bacteria	Firmicutes	Bacilli	Erysipelotrichales	Erysipelotrichaceae	[Clostridium] innocuum group	0.139033	0.419188	1.04676
Bacteria	Firmicutes	Clostridia	Peptostreptococcales-Tissierellales	Peptostreptococcaceae	Romboutsia	0.156082	0.452104	-3.36864
Bacteria	Firmicutes	Bacilli	Erysipelotrichales	Erysipelatoclostridiaceae	Erysipelatoclostridium	0.174431	0.462422	-1.33455
Bacteria	Firmicutes	Clostridia	Lachnospirales	Lachnospiraceae	Fusicatenibacter	0.232483	0.467728	-2.28252
Bacteria	Firmicutes	Clostridia	Lachnospirales	Lachnospiraceae	Tyzzerella	0.255348	0.487379	1.95222
Bacteria	Firmicutes	Clostridia	Lachnospirales	Lachnospiraceae	Lachnospiraceae UCG-009	0.219509	0.48784	1.98334
Bacteria	Desulfobacterota	Desulfovibrionia	Desulfovibrionales	Desulfovibrionaceae	Bilophila	0.21142	0.492511	-2.16445
Bacteria	Verrucomicrobiota	Verrucomicrobiae	Verrucomicrobiales	Akkermansiaceae	Akkermansia	0.225458	0.516908	-1.25777
Bacteria	Firmicutes	Clostridia	Christensenellales	Christensenellaceae	Christensenellaceae R-7 group	0.258262	0.517777	-3.48848
Bacteria	Proteobacteria	Gammaproteobacteria	Enterobacterales	Enterobacteriaceae	Escherichia-Shigella	0.252407	0.534793	2.77099
Bacteria	Fusobacteriota	Fusobacteriia	Fusobacteriales	Fusobacteriaceae	Fusobacterium	0.291851	0.537957	1.51353
Bacteria	Firmicutes	Clostridia	Lachnospirales	Lachnospiraceae	Blautia	0.25531	0.541808	-0.270856
Bacteria	Actinobacteriota	Coriobacteriia	Coriobacteriales	Eggerthellaceae	Adlercreutzia	0.281486	0.564084	-0.158157
Bacteria	Firmicutes	Clostridia	Peptostreptococcales-Tissierellales	Anaerovoracaceae	Family XIII AD3011 group	0.331557	0.582015	-1.77453
Bacteria	Firmicutes	Clostridia	Lachnospirales	Lachnospiraceae	Anaerostipes	0.319553	0.587377	1.37316
Bacteria	Firmicutes	Clostridia	Lachnospirales	Lachnospiraceae	Sellimonas	0.336919	0.59846	-2.99141
Bacteria	Firmicutes	Clostridia	Oscillospirales	Ruminococcaceae	NA	0.336983	0.607399	-2.39038
Bacteria	Firmicutes	Clostridia	Lachnospirales	Lachnospiraceae	[Eubacterium] hallii group	0.418226	0.645838	-2.03174
Bacteria	Firmicutes	Clostridia	Peptococcales	Peptococcaceae	NA	0.432534	0.649915	-1.04336
Bacteria	Actinobacteriota	Coriobacteriia	Coriobacteriales	Coriobacteriaceae	Collinsella	0.395682	0.653156	-2.56201
Bacteria	Firmicutes	Clostridia	Oscillospirales	Oscillospiraceae	Oscillibacter	0.424632	0.656309	0.822729
Bacteria	Firmicutes	Clostridia	Oscillospirales	Oscillospiraceae	Colidextribacter	0.391233	0.657927	0.982529
Bacteria	Firmicutes	Clostridia	Peptostreptococcales-Tissierellales	Peptostreptococcaceae	Terrisporobacter	0.400673	0.659134	2.18427
Bacteria	Firmicutes	Clostridia	Oscillospirales	[Eubacterium] coprostanoligenes group	NA	0.438196	0.673409	1.71663
Bacteria	Firmicutes	Clostridia	Oscillospirales	Ruminococcaceae	Negativibacillus	0.43561	0.680329	-2.46743
Bacteria	Firmicutes	Clostridia	Oscillospirales	Ruminococcaceae	Fournierella	0.452129	0.68055	-2.68161
Bacteria	Firmicutes	Clostridia	Oscillospirales	Ruminococcaceae	Pygmaiobacter	0.466193	0.688717	-2.96322
Bacteria	Firmicutes	Clostridia	Oscillospirales	Ruminococcaceae	Phocea	0.491214	0.707831	1.61972
Bacteria	Firmicutes	Clostridia	Peptostreptococcales-Tissierellales	Anaerovoracaceae	Mogibacterium	0.502357	0.712608	0.747302
Bacteria	Firmicutes	Bacilli	Erysipelotrichales	Erysipelatoclostridiaceae	Coprobacillus	0.513795	0.731523	1.43866
Bacteria	Firmicutes	Clostridia	Lachnospirales	Lachnospiraceae	UC5-1-2E3	0.563647	0.747074	-0.138517
Bacteria	Firmicutes	Clostridia	Lachnospirales	Lachnospiraceae	Lachnospiraceae UCG-004	0.563699	0.755859	0.471816
Bacteria	Firmicutes	Clostridia	Oscillospirales	Hydrogenoanaerobacterium	NA	0.574313	0.765973	0.96013
Bacteria	Firmicutes	Clostridia	Lachnospirales	Lachnospiraceae	NA	0.53316	0.767551	0.04727
Bacteria	Firmicutes	Clostridia	Oscillospirales	Butyricicoccaceae	Butyricicoccus	0.583351	0.770063	1.29209
Bacteria	Bacteroidota	Bacteroidia	Bacteroidales	Marinifilaceae	Butyricimonas	0.607737	0.789252	-0.613304
Bacteria	Firmicutes	Clostridia	Lachnospirales	Lachnospiraceae	Frisingicoccus	0.6146	0.803629	0.87868
Bacteria	Desulfobacterota	Desulfovibrionia	Desulfovibrionales	Desulfovibrionaceae	Desulfovibrio	0.636284	0.804575	0.808406
Bacteria	Firmicutes	Clostridia	Lachnospirales	Lachnospiraceae	Howardella	0.637129	0.808812	0.882358
Bacteria	Firmicutes	Bacilli	Erysipelotrichales	Erysipelotrichaceae	Turicibacter	0.661308	0.825715	0.500148
Bacteria	Firmicutes	Bacilli	Erysipelotrichales	Erysipelatoclostridiaceae	Candidatus Stoquefichus	0.662615	0.826637	-0.00637491
Bacteria	Firmicutes	Clostridia	Oscillospirales	Ruminococcaceae	Incertae Sedis	0.689208	0.838709	0.448954
Bacteria	Firmicutes	Clostridia	Oscillospirales	Butyricicoccaceae	UCG-009	0.686699	0.840727	-0.771572
Bacteria	Actinobacteriota	Actinobacteria	Bifidobacteriales	Bifidobacteriaceae	Bifidobacterium	0.68866	0.844255	0.634263
Bacteria	Firmicutes	Clostridia	Lachnospirales	Lachnospiraceae	Hungatella	0.694981	0.853318	0.379274
Bacteria	Firmicutes	Clostridia	Clostridiales	Clostridiaceae	Clostridium sensu stricto 1	0.71481	0.859786	0.436568
Bacteria	Proteobacteria	Gammaproteobacteria	Burkholderiales	Sutterellaceae	Parasutterella	0.711426	0.863992	1.13712
Bacteria	Firmicutes	Clostridia	Lachnospirales	Lachnospiraceae	Eisenbergiella	0.733622	0.868238	-0.137006
Bacteria	Firmicutes	Clostridia	Lachnospirales	Lachnospiraceae	Lachnospiraceae NK4A136 group	0.732337	0.868393	-0.137481
Bacteria	Firmicutes	Clostridia	Lachnospirales	Lachnospiraceae	Murimonas	0.740383	0.87368	-0.636624
Bacteria	Bacteroidota	Bacteroidia	Bacteroidales	Rikenellaceae	Alistipes	0.780888	0.895569	-0.00596134
Bacteria	Firmicutes	Clostridia	Lachnospirales	Lachnospiraceae	[Eubacterium] fissicatena group	0.786284	0.896851	1.19234
Bacteria	Firmicutes	Bacilli	Erysipelotrichales	Erysipelotrichaceae	Dielma	0.788003	0.898611	0.114969
Bacteria	Firmicutes	Bacilli	Lactobacillales	Enterococcaceae	Enterococcus	0.777577	0.90017	-0.388119
Bacteria	Firmicutes	Clostridia	Oscillospirales	Oscillospiraceae	Intestinimonas	0.795223	0.905435	0.62266
Bacteria	Firmicutes	Bacilli	Lactobacillales	Streptococcaceae	Lactococcus	0.822867	0.917099	0.76031

## Sheet: Figure 7J
Sample Type	Mouse ID	Donor	Experiment	Ethnicity	Bacteroides abundance (CLR)
Recipient	B_3	OB051	HFHS	EA	10.9579
Recipient	K_5	OB051	HFHS	EA	9.72325
Recipient	D_7	OB084	HFHS	EA	12.8269
Recipient	D_8	OB084	HFHS	EA	11.9766
Recipient	F_3	OB026	HFHS	EA	12.6662
Recipient	F_4	OB026	HFHS	EA	11.2449
Recipient	H_7	OB070	HFHS	EA	12.1041
Recipient	H_8	OB070	HFHS	EA	10.5824
Recipient	J_3	OB078	HFHS	EA	11.2392
Recipient	J_4	OB078	HFHS	EA	10.0893
Recipient	A_1	OB064	HFHS	W	8.50599
Recipient	A_2	OB064	HFHS	W	7.69579
Recipient	C_5	OB069	HFHS	W	10.5058
Recipient	C_6	OB069	HFHS	W	10.1477
Recipient	E_1	OB063	HFHS	W	10.0498
Recipient	E_2	OB063	HFHS	W	9.33776
Recipient	G_5	OB045	HFHS	W	11.8038
Recipient	G_6	OB045	HFHS	W	12.2575
Recipient	I_1	OB081	HFHS	W	10.1668
Recipient	I_2	OB081	HFHS	W	10.0705
