# Supplementary material for: The East Asian gut microbiome is distinct from colocalized White subjects and connected to metabolic health
Source: eLife journal article supplement (doi:10.7554/elife.70349), 2021-10-07
Supplement: supp [file elife-70349-supp-v2.zip › elife_poa_e70349_Figure_8_source_data_1.xlsx]

## Sheet: Figure 8A,B,C
Mouse ID	Donor	Experiment	Ethnicity	Body weight % change	Fat mass % change	Lean mass % change
M1-1	OB064	LFPP1	W	2.5	1.533	-1.533
M1-2	OB064	LFPP1	W	2.7	1.98926	-1.98926
M1-3	OB064	LFPP1	W	1.9	-0.95705	0.95705
M2-4	OB064	LFPP1	W	3.4	5.7508	-5.7508
M2-5	OB064	LFPP1	W	3.4	0.453105	-0.453105
M2-6	OB064	LFPP1	W	4.1	2.22468	-2.22468
O1-1	OB051	LFPP1	EA	0.9	1.51515	-1.51515
O1-2	OB051	LFPP1	EA	2.2	-2.85212	2.85212
O1-3	OB051	LFPP1	EA	1.5	0.608594	-0.608594
O2-4	OB051	LFPP1	EA	2	-0.155926	0.155926
O2-5	OB051	LFPP1	EA	2	-1.86753	1.86753
O2-6	OB051	LFPP1	EA	1.8	-1.39441	1.39441
7_1	OB069	LFPP2	W	0	5.01663	-5.01663
7_2	OB069	LFPP2	W	-2.4	0.829215	-0.829215
7_3	OB069	LFPP2	W	-1.4	2.7066	-2.7066
7_4	OB069	LFPP2	W	-1.3	1.07798	-1.07798
7_5	OB069	LFPP2	W	0.2	0.78343	-0.78343
7_6	OB069	LFPP2	W	-0.8	0.0742923	-0.0742923
8_1	OB084	LFPP2	EA	0	-3.13133	3.13133
8_2	OB084	LFPP2	EA	-0.6	-4.6982	4.6982
8_3	OB084	LFPP2	EA	-0.7	-4.07301	4.07301
8_4	OB084	LFPP2	EA	-0.8	0.110417	-0.110417
8_5	OB084	LFPP2	EA	1	0.462182	-0.462182
8_6	OB084	LFPP2	EA	1.9	-2.97728	2.97728

## Sheet: Figure 8D
Mouse ID	Donor	Experiment	Ethnicity	0 min	15 min	30 min	60 min	90 min	120 min
M1-1	OB064	LFPP1	W	133	171	138	124	118	124
M1-2	OB064	LFPP1	W	180	494	333	215	138	127
M1-3	OB064	LFPP1	W	131	164	411	170	147	110
M2-4	OB064	LFPP1	W	161	326	332	234	157	137
M2-5	OB064	LFPP1	W	176	403	336	213	155	130
M2-6	OB064	LFPP1	W	203	383	327	205	176	158
O1-1	OB051	LFPP1	EA	146	347	323	237	151	128
O1-2	OB051	LFPP1	EA	128	500	274	456	377	208
O1-3	OB051	LFPP1	EA	139	368	411	277	194	183
O2-4	OB051	LFPP1	EA	116	352	307	236	151	128
O2-5	OB051	LFPP1	EA	97	269	279	90	85	117
O2-6	OB051	LFPP1	EA	112	125	119	95	90	90

## Sheet: Figure 8E,F,G
Mouse ID	Donor	Experiment	Ethnicity	Body weight % change	Fat mass % change	Lean mass % change
A_1	OB064	HFHS	W	5.9	17.2802	-17.2802
A_2	OB064	HFHS	W	6.6	17.1779	-17.1779
B_3	OB051	HFHS	EA	3.2	4.81699	-4.81699
K_5	OB051	HFHS	EA	0.7	6.13842	-6.13842
C_5	OB069	HFHS	W	6.3	9.93552	-9.93552
C_6	OB069	HFHS	W	3.3	2.7248	-2.7248
D_7	OB084	HFHS	EA	1.9	-2.14871	2.14871
D_8	OB084	HFHS	EA	2.6	-0.118923	0.118923
E_1	OB063	HFHS	W	2.9	15.2376	-15.2376
E_2	OB063	HFHS	W	4.3	16.1481	-16.1481
F_3	OB026	HFHS	EA	2.3	10.667	-10.667
F_4	OB026	HFHS	EA	0.6	3.47441	-3.47441
G_5	OB045	HFHS	W	1.9	10.2907	-10.2907
G_6	OB045	HFHS	W	2.3	4.67862	-4.67862
H_7	OB070	HFHS	EA	4.8	14.8967	-14.8967
H_8	OB070	HFHS	EA	3.8	14.5654	-14.5654
I_1	OB081	HFHS	W	4	3.99643	-3.99643
I_2	OB081	HFHS	W	3.5	9.65063	-9.65063
J_3	OB078	HFHS	EA	3.4	6.7665	-6.7665
J_4	OB078	HFHS	EA	2.9	10.6113	-10.6113

## Sheet: Figure 8H
Mouse ID	Donor	Experiment	Ethnicity	0 min	15 min	30 min	60 min	90 min	120 min
A_1	OB064	HFHS	W	159	406	269	214	189	168
A_2	OB064	HFHS	W	142	367	284	268	228	187
B_3	OB051	HFHS	EA	172	540	370	279	223	186
K_5	OB051	HFHS	EA	202	524	443	292	226	213
C_5	OB069	HFHS	W	165	349	361	258	218	177
C_6	OB069	HFHS	W	145	307	319	284	201	167
D_7	OB084	HFHS	EA	98	348	265	153	125	113
D_8	OB084	HFHS	EA	93	275	318	172	124	117
E_1	OB063	HFHS	W	132	259	231	236	199	181
E_2	OB063	HFHS	W	156	390	268	195	175	178
F_3	OB026	HFHS	EA	138	320	210	187	206	171
F_4	OB026	HFHS	EA	146	285	313	285	188	168
G_5	OB045	HFHS	W	131	329	340	170	161	142
G_6	OB045	HFHS	W	111	477	323	258	183	172
H_7	OB070	HFHS	EA	182	333	269	210	204	169
H_8	OB070	HFHS	EA	208	383	390	307	222	186
I_1	OB081	HFHS	W	164	441	391	242	171	171
I_2	OB081	HFHS	W	177	340	276	209	180	165
J_3	OB078	HFHS	EA	153	427	363	213	176	145
J_4	OB078	HFHS	EA	158	355	335	265	197	163
