# Supplementary material for: The East Asian gut microbiome is distinct from colocalized White subjects and connected to metabolic health
Source: eLife journal article supplement (doi:10.7554/elife.70349), 2021-10-07
Supplement: supp [file elife-70349-supp-v2.zip › elife_poa_e70349_Supplementary_file_1.xlsx]

## Sheet: Supplementary File 1A
Supplementary File 1A. Characteristics of IDEO study participants.
Characteristics	Lean			Obese			East Asian vs White
	East Asian (n=12)	White (n=11)	p-value	East Asian (n=10)	White (n=13)	p-value	p-value between all subjects between Ethnicities
Demographic Features
Age, years	47.1 ± 12.2	40.8 ± 14.8	0.28	43.8 ± 12.4	50.0 ± 12.2	0.25	0.96
Sex, n (%)
Women	8 (66.7%)	7 (63.6%)	1	5 (50.0%)	8 (61.5%)	0.9	1
Men	4 (33.3%)	4 (36.4%)		5 (50.0%)	5 (38.5%)
US born, n (%)	6 (50.0%)	6 (54.5%)	1	6 (60.0%)	12 (92.3%)	0.176	0.252
Metabolic Parameters
Diabetes, n (%)	2 (16.7%)	0 (0%)	0.22	2 (20.0%)	5 (38.5%)	0.36	0.31
BMI, kg/m2	22.3 ± 1.94 ⧫	21.7 ± 2.08 ⬹	0.5	33.0 ± 6.59 ⧫	40.1 ± 6.44 ⬹	0.019	0.096
Weight, kg	58.7 ± 10.1 ⧫	63.6 ± 11.7 ⬹	0.3	89.8 ± 22.8 ⧫	111 ± 20.7 ⬹	0.031	0.038
Body fat, %	32.2 ± 6.21 ⧫	29.8 ± 6.18 ⬹	0.36	37.9 ± 6.35 ⧫	43.5 ± 5.16 ⬹	0.041	0.38
WHR	0.889 ± 0.0651	0.836 ± 0.0727 ⬹	0.11	0.876 ± 0.333	0.998 ± 0.0976 ⬹	0.032	0.041
Fat Mass, g	18700 ± 3590 ⧫	18700 ± 4340 ⬹	0.99	33900 ± 12200 ⧫	47500 ± 10800 ⬹	0.014	0.066
Fat Free Mass, g	38000 ± 9360 ⧫	42300 ± 10100 ⬹	0.32	52200 ± 11600 ⧫	58900 ± 11600 ⬹	0.19	0.087
VAT mass, g	301 ± 168 ⧫	235 ± 101 ⬹	0.26	713 ± 339 ⧫	899 ± 376 ⬹	0.24	0.42
%VAT/Fat Mass	1.58 ± 0.738	1.32 ± 0.635	0.38	2.10 ± 0.681	1.89 ± 0.705	0.48	0.4
Laboratory Parameters
Insulin, mIU/L	7.35 ± 2.77 ⧫	5.45 ± 2.86 ⬹	0.12	23.8 ± 17.0 ⧫	23.5 ± 14.4 ⬹	0.97	0.92
FPG, mg/dL	101 ± 24.9	89.7 ± 6.86	0.14	127 ± 53.4	117 ± 72.4	0.7	0.55
HOMA-IR	1.92 ± 0.996	1.27 ± 0.647 ⬹	0.079	8.80 ± 9.64	8.15 ± 8.92 ⬹	0.87	0.98
Cholesterol, mg/dL	194 ± 24.9	181 ± 29.1	0.27	206 ± 60.1	180 ± 63.9	0.34	0.19
Triglycerides, mg/dL	106 ± 55.2	58.4 ± 29.5 ⬹	0.018	183 ± 233	127 ± 57.5 ⬹	0.48	0.23
LDL, mg/dL	114 ± 27.2	109 ± 30.5	0.7	120 ± 44.0	120 ± 41.6	0.99	0.89
HDL, mg/dL	58.6 ± 16.2	58.3 ± 12.8 ⬹	0.96	50.9 ± 11.6	45.9 ± 10.2 ⬹	0.3	0.39
Lifestyle Parameters
Alcohol, drinks per week	4.47 ± 7.69	1.92 ± 2.47	0.3	2.05 ± 5.20	2.82 ± 5.06	0.73	0.56
Statin use, n (%)	1 (8.3%)	0 (0%) ⬹	1	2 (20.0%)	8 (61.5%) ⬹	0.12	0.22
Metformin use, n (%)	2 (16.7%)	0 (0%)	0.5	1 (10.0%)	4 (30.8%)	0.49	1
Physical activity, MET-min/week	3570 ± 3480	4680 ± 1570 ⬹	0.36	3070 ± 1870	2000 ± 1760 ⬹	0.18	0.76
Values are mean ± SD. Abbreviations: BMI, body mass index; WHR, waist-hip-ratio; VAT, visceral adipose tissue; FPG, fasting plasma glucose; HOMA-IR, homeostatic model assessment of insulin resistance. HOMA-IR = fasting insulin (mIU/L) × [FPG (mg/dL)/405]. Where indicated, n (%) values are indicated by n and and the percentage of each group within parentheses. The p-values are Student's t tests in…

## Sheet: Supplementary File 1B
Supplementary File 1B. Human 16S-seq and metagenomic sequencing sample information.
Sample ID	16S raw reads	16S filtered reads	MG raw reads	MG filtered reads	MG raw bp	MG filtered bp	Metabolomics	Ethnicity	BMI classification	BMI (kg/m2)	Body fat (%)	US born	Zipcode	Birth location	2018 Census White population*	2018 Census Asian population*
OB012	250093	229198	538458	537358	75384120	74898421	N	East Asian	Obese	34.1	40.9	Yes	94103	San Francisco, CA	11546	8890
OB021	187355	175319	37141548	36970010	5199817000	5172140000	N	East Asian	Obese	36.5	31.3	No	94103	Caston, China	11546	8890
OB022	176014	159751	807172	800958	113004080	112072491	N	East Asian	Obese	26.8	41.7	No	94080	Hong Kong, China	23613	26918
OB024	239223	214959	39418556	39227226	5518598000	5487086000	Y	East Asian	Obese	32.8	35.7	No	94110	Zhejiang, China	41050	10839
OB026	302603	282507	33361092	32551078	4670553000	4551964000	N	East Asian	Lean	22.4	26.7	No	94112	China	19903	43725
OB027	299934	270687	16910822	16817886	2367515000	2352743000	N	East Asian	Lean	20.1	36	No	94112	Chengdu, China	19903	43725
OB030	265873	240129	53680268	53392530	7515238000	7470358000	N	East Asian	Lean	24.5	23.8	Yes	94040	Phoenix, AZ	17830	12975
OB035	172407	156641	16040300	15955080	2245642000	2231664000	Y	East Asian	Lean	19.8	29.5	Yes	94552	San Francisco, CA	6098	6387
OB040	309015	281211	76758090	76328248	10746133000	10677475000	Y	East Asian	Lean	21.8	36	Yes	94116	San Francisco, CA	17256	25298
OB041	383100	356660	49509522	49363628	6931333000	6907150000	N	East Asian	Lean	23.4	41.1	No	94566	Tian Jian, China	29487	11912
OB043	344064	316421	33200258	32994820	4648036000	4616204000	Y	East Asian	Obese	40.3	47.1	No	94015	Taiwan	14995	38661
OB044	172876	158526	36383272	36193792	5093658000	5064008000	N	East Asian	Lean	24.4	29.9	No	NA	Hong Kong, China	NA	NA
OB051	182622	170429	33063370	32888328	4628872000	4601028000	Y	East Asian	Lean	19.7	35.4	No	94547	Hong Kong, China	6984	11804
OB055	289190	260509	31810772	31615190	4453508000	4423220000	N	East Asian	Obese	28.3	32.9	Yes	94619	Flushing, NY	9606	4727
OB057	332295	301159	40514692	40252700	5672057000	5631629000	N	East Asian	Lean	20.2	40.2	No	94920	Canada	11256	512
OB070	268324	248718	38059268	37794720	5328298000	5288004000	Y	East Asian	Lean	22.2	33.4	Yes	94131	Chicago, IL	19393	5564
OB072	295082	275944	35951754	35731164	5033246000	4998850000	N	East Asian	Obese	26.8	39.6	Yes	94116	San Francisco, CA	17256	25298
OB078	311085	288471	29811346	29691224	4173588000	4152946000	N	East Asian	Lean	24.4	33.7	Yes	94122	Santa Clara, CA	24897	28844
OB079	352732	324383	29598156	29502596	4143742000	4126613000	Y	East Asian	Obese	29	28.7	Yes	94127	Columbus, OH	11736	7024
OB084	308967	282707	54764960	54384492	7667094000	7608852000	Y	East Asian	Lean	24.3	21	Yes	94401	San Francisco, CA	18205	6720
OB085	223845	204694	31131262	30930166	4358377000	4327585000	Y	East Asian	Obese	28.7	34.5	Yes	94109	San Francisco, CA	33808	15208
OB088	321958	300358	NA	NA	NA	NA	Y	East Asian	Obese	46.8	47	Yes	NA	San Francisco, CA	NA	NA
OB006	247281	229272	15824940	15731718	2215492000	2201220000	N	White	Obese	30.2	34.8	No	94133	Italy	11340	13327
OB008	80805	75705	56786974	56450806	7950176000	7897490000	N	White	Obese	41.3	46	Yes	94586	Sacramento, CA	760	75
OB011	241862	221780	26755564	26524944	3745779000	3710107000	N	White	Obese	39.9	NA	Yes	94122	Chicago, CA	24897	28844
OB014	241795	220736	30303610	30109364	4242505000	4211653000	N	White	Obese	48.5	39.6	Yes	94806	Reno, Nevada	28120	11499
OB018	302946	272646	39391098	39171394	5514754000	5480016000	Y	White	Obese	50.7	49	Yes	94110	Neptune, NJ	41050	10839
OB020	280088	258396	46432214	46079090	6500510000	6447086000	N	White	Lean	19.2	18.7	Yes	94172	San Francisco, CA	NA	NA
OB028	263878	226387	6389842	6358888	894577880	889537791	N	White	Obese	47.1	45.9	Yes	95401	Marietta, GA	26945	1700
OB036	117145	109186	33110946	32939708	4635532000	4608038000	N	White	Obese	37.4	45.3	Yes	94117	Lawrence, MA	32791	5135
OB039	240217	213540	32872432	32703916	4602140000	4575180000	Y	White	Obese	35	50.2	Yes	94103	Exeter, NH	11546	8890
OB042	349316	324698	41242260	41020170	5773916000	5738257000	N	White	Lean	25.2	28.8	Yes	94030	New York City, NY	9297	10883
OB045	203017	190485	48960506	48770366	6854471000	6822684000	N	White	Lean	22.6	39.6	No	94132	Chernovtski, Ukraine	11157	13033
OB046	182435	162428	8043476	8005192	1126087000	1119832000	Y	White	Obese	30.1	42.3	Yes	94115	San Francisco, CA	20060	7772
OB050	218023	203815	53575362	53310600	7500551000	7458279000	N	White	Obese	36.8	36.9	Yes	94124	NA	4370	12799
OB056	206715	192043	12053782	11972462	1687529000	1675151000	N	White	Obese	43	48.1	Yes	95687	NA	43045	5198
OB059	252967	235181	17046422	17010176	2386499000	2380061000	Y	White	Lean	20.4	33.7	Yes	94117	San Francisco, CA	32791	5135
OB063	328168	306235	32448128	32323324	4542738000	4521738000	Y	White	Lean	24.3	28.4	No	94120	Bailen, Spain	NA	NA
OB064	289890	266402	43900832	43622288	6146116000	6102879000	Y	White	Lean	20.5	26.3	Yes	94122	Mount Vernon, WA	24897	28844
OB066	322885	296887	49012952	48729822	6861813000	6816663000	N	White	Lean	19.2	29.9	No	94112	Italy	19903	43725
OB067	260720	240275	36430094	36319222	5100213000	5080501000	Y	White	Obese	37.8	37.3	Yes	94015	Sacramento, CA	14995	38661
OB068	373322	341008	23572248	23430564	3300115000	3278289000	N	White	Lean	20.6	30.8	No	94122	Hong Kong, China	24897	28844
OB069	312812	293066	38740554	38525848	5423678000	5389440000	Y	White	Lean	20.7	22.1	No	94114	Lille, France	26387	4586
OB071	355699	327821	12775886	12704140	1788624000	1777045000	Y	White	Obese	42.9	46.2	Yes	94619	Venice, CA	9606	4727
OB081	134022	126486	21809094	21684518	3053273000	3033423000	Y	White	Lean	24.1	31.1	Yes	94941	Telford, PA	27172	2083
OB082	295228	268376	44377302	44092470	6212822000	6168605000	N	White	Lean	21.8	38.2	Yes	94110	New York, USA	41050	10839
Abbreviations: MG, metagenomic; BMI, body mass index. NA, not available. *Census data was obtained from the B02001 table of 2018 Census data taken from census.gov and included to ease reproduction. Two subjects provided post office box codes for a specific location for their mailing address (e.g. not their exact area of residence) and these were not included in Figure 6.

## Sheet: Supplementary File 1C
Supplementary File 1C. Beta diversity metrics comparing East Asian and White subjects.
Distance Metric	p-value	R2
Unweighted Unifrac	0.0007	0.055
Jaccard	0.002	0.035
Bray-Curtis	0.004	0.043
Jensen-Shannon Divergence	0.006	0.05
PhILR Euclidean*	0.006	0.046
CLR Euclidean	0.014	0.033
Weighted Unifrac	0.21	0.029
*PhILR Euclidean is shown in Figure 1A.

## Sheet: Supplementary File 1D
Supplementary File 1D. Untargeted metabolomics analyses from the stool samples of East Asian and White individuals.
		Short-chain Fatty Acids			Branched Chain Amino Acids			Other Amino Acids									Sugars		Biological Acids			Base Pairs and Derivatives
Sample ID	Ethnicity	Acetate	Propionate	Butyrate	Valine	Leucine	Isoleucine	Taurine	Lysine	Tyrosine	Glycine	Alanine	Proline	Phenyl- alanine	Histidine	Tryp- tophan	Glucose	Oligo- saccharides	Lactate	Succinate	Formate	Uracil	Xanthine	Hypo- xanthine
OB024	East Asian	0.105872	0.0196361	0.0331871	0.0184559	0.0256636	0.0091392	0.0146849	0.0146373	0.00397359	0.00677823	0.0226964	0.0195367	0.00390062	0.00120891	0.0014127	0.00421156	0.144968	0.0101491	0.00281016	0.00017488	0.00130652	0.00121915	0.00126562
OB035	East Asian	0.0780938	0.0128878	0.0194578	0.01184	0.0263834	0.00892526	0.0102054	0.0210725	0.00413491	0.00818466	0.02485	0.0297065	0.0033708	0.00151696	0.0014111	0.0022647	0.132276	0.0259115	0.00257854	0.00013147	0.00087448	0.00070388	0.00064337
OB040	East Asian	0.0892103	0.0166834	0.0231572	0.0156766	0.028274	0.00925205	0.0127997	0.0114965	0.00396364	0.00710632	0.0244559	0.0263536	0.00350776	0.00127737	0.00151809	0.00295515	0.155562	0.0107455	0.00298491	0.00020301	0.00228319	0.00077399	0.0008476
OB043	East Asian	0.105057	0.0166039	0.038874	0.01537	0.017595	0.00647476	0.00730231	0.00975287	0.00280982	0.0213049	0.0203046	0.0238373	0.00224839	0.00098411	0.00077529	0.00199403	0.135516	0.0216163	0.0021296	0.00024122	0.0037543	0.00082068	0.00097011
OB051	East Asian	0.0729262	0.0115453	0.0214844	0.0105206	0.0322853	0.010741	0.0116258	0.0122118	0.00494251	0.00859401	0.0266358	0.0239737	0.00430093	0.00166441	0.00145685	0.0018973	0.154948	0.0139273	0.00297434	0.00018372	0.00218406	0.00096345	0.00088067
OB070	East Asian	0.135353	0.0109376	0.0443199	0.0101924	0.0234445	0.00856765	0.0163519	0.00994978	0.00368672	0.00797127	0.0219895	0.0184708	0.00317811	0.00126421	0.00109538	0.00466574	0.151384	0.0117393	0.0197077	0.00012832	0.00234883	0.00119967	0.00082532
OB079	East Asian	0.110793	0.0217331	0.0304698	0.0201354	0.0239642	0.008302	0.00695353	0.0116122	0.00433162	0.00616065	0.0239833	0.026948	0.00293451	0.00133167	0.00161879	0.00052445	0.0860736	0.0147892	0.00296643	0.0002717	0.00210912	0.00162652	0.00197197
OB084	East Asian	0.0975805	0.0131943	0.0223202	0.0123452	0.0326622	0.0110375	0.0108086	0.019072	0.00612659	0.00803166	0.0257335	0.0246775	0.00477389	0.00159811	0.00197048	0.00107963	0.117219	0.0124627	0.00272547	0.0002938	0.00502522	0.00097888	0.00102965
OB085	East Asian	0.108561	0.015016	0.0275972	0.0142219	0.0219152	0.00835818	0.0186258	0.0157027	0.00406362	0.00745638	0.0248301	0.0200406	0.00337224	0.00131113	0.001602	0.00629391	0.186946	0.010585	0.00234917	0.00017328	0.00184744	0.00121991	0.00120121
OB088	East Asian	0.106873	0.010836	0.0192059	0.0100476	0.0278659	0.00960807	0.0144212	0.0209931	0.00495173	0.00869468	0.0242499	0.0245378	0.00474629	0.0019348	0.0012566	0.00165235	0.13336	0.0104922	0.00397539	0.00022256	0.00073336	0.00116362	0.0007343
OB018	White	0.0664029	0.00956354	0.0218501	0.00837445	0.0321402	0.0115784	0.00916332	0.0127764	0.00494431	0.0125669	0.0293016	0.0302735	0.00469911	0.00154986	0.00257469	0.00181863	0.153962	0.0145656	0.0276137	0.00026483	0.00201258	0.00207798	0.00211922
OB039	White	0.0605597	0.0105484	0.0180559	0.00940167	0.0319864	0.0117071	0.0163041	0.016307	0.00499596	0.012123	0.0291546	0.0246243	0.00468643	0.00126796	0.0018105	0.00268732	0.18886	0.0125336	0.00321376	0.00023147	0.00087576	0.0010966	0.0007821
OB046	White	0.057417	0.00961548	0.0170016	0.00824372	0.0272263	0.0103785	0.00755087	0.0223634	0.00426671	0.00978354	0.0327765	0.0275471	0.00380498	0.00096963	0.00167494	0.00051691	0.146221	0.0153755	0.00350337	0.00034853	0.00106388	0.00099552	0.00146871
OB059	White	0.0945847	0.0152859	0.0279179	0.0138898	0.0247548	0.00763205	0.00836202	0.0112986	0.00403406	0.0100422	0.0239074	0.0302697	0.00271087	0.00160981	0.00098527	0.00122126	0.107306	0.0184374	0.00249812	0.00032024	0.00341213	0.00132858	0.00149387
OB063	White	0.0833584	0.0123053	0.0207927	0.0108072	0.0263847	0.0104078	0.00830063	0.0145762	0.00462046	0.00866719	0.0282161	0.0318621	0.0038656	0.00171139	0.00164319	0.00074847	0.117535	0.0131696	0.00496294	0.00037714	0.00219051	0.00135889	0.00194633
OB064	White	0.0575562	0.0114883	0.026114	0.0102486	0.03063	0.0118607	0.00649577	0.0116477	0.00454308	0.0110132	0.0293759	0.0278053	0.0043762	0.0011542	0.00190384	0.00115889	0.131529	0.0147078	0.00352516	0.00045268	0.00180028	0.00155285	0.00141285
OB067	White	0.0884279	0.012196	0.0265137	0.0110506	0.0241403	0.00887432	0.00963538	0.0121846	0.00477168	0.00698981	0.0247879	0.0241151	0.00884399	0.00466157	0.0022245	0.00151255	0.11967	0.012056	0.00401362	0.00027036	0.00359088	0.0018743	0.00243464
OB069	White	0.0948249	0.0104105	0.0277021	0.00903534	0.0250512	0.00915629	0.00853734	0.011675	0.00394077	0.00875057	0.0252846	0.029078	0.00322524	0.00129344	0.00161725	0.00120171	0.120261	0.0179372	0.00352791	0.00029514	0.00307301	0.00244334	0.00229379
OB071	White	0.118727	0.0158676	0.041632	0.0148104	0.0255244	0.00922381	0.0125199	0.0118742	0.00411137	0.0074476	0.023623	0.0205093	0.00363973	0.00131982	0.00142472	0.00237264	0.13175	0.0119125	0.00276702	0.00014948	0.0013903	0.00127458	0.00096527
OB081	White	0.071799	0.0104954	0.0368356	0.00927129	0.0224898	0.00762234	0.00750884	0.00936456	0.004106	0.00893531	0.0224135	0.0278773	0.00306393	0.00135731	0.00146514	0.00165373	0.10115	0.0212887	0.00309806	0.00028416	0.00325276	0.00287339	0.001622
East Asian (mean)		0.101032	0.0149073	0.0280073	0.0138806	0.0260053	0.00904057	0.0123779	0.0146501	0.00429848	0.00902828	0.0239729	0.0238082	0.00363335	0.00140917	0.00141173	0.00275388	0.139825	0.0142418	0.00452017	0.000202396	0.00224665	0.00106697	0.00103698
White (mean)		0.0793658	0.0117776	0.0264416	0.0105133	0.0270328	0.00984413	0.00943781	0.0134068	0.00443344	0.00963193	0.0268841	0.0273962	0.00429161	0.0016895	0.0017324	0.00148921	0.131824	0.0151984	0.00587237	0.000299403	0.00226621	0.0016876	0.00165388
p-value		0.02	0.038	0.676	0.022	0.578	0.232	0.067	0.501	0.667	0.696	0.03	0.034	0.296	0.439	0.081	0.06	0.503	0.632	0.654	0.007	0.97	0.013	0.01
Fold-change		1.27299	1.26573	1.05922	1.32029	0.961991	0.918372	1.31152	1.09274	0.969557	0.937328	0.891713	0.869035	0.846618	0.834074	0.814895	1.84922	1.06069	0.93706	0.769736	0.675999	0.99137	0.632243	0.627
Values reflect relative concentrations of identified metabolites obtained by normalized peak area in NMR spectroscopy analysis. Between group p-values are calculated using Student's t test comparing between ethnicities.

## Sheet: Supplementary File 1E
Supplementary File 1E. Targeted metabolomics analyses from the stool samples of East Asian and White individuals.
		Short-chain Fatty Acids (µg/g)					Branched Chain Amino Acids (µg/g)			Bile Acids (nmol/g)
Sample ID	Ethnicity	Isobutyrate	Acetate	Propionate	Butyrate	Valerate	Leucine	Valine	Isoleucine	Bile acids, total	Bile acids, free	Bile acids, conjugated
OB024	East Asian	273.87	6287.74	760.87	5139.83	559.12	566.3	441.52	318.9	17815.1	17745.1	70.04
OB035	East Asian	253.45	2432.32	270.23	598.25	303.79	360.68	302.94	210.22	4004.12	3992.91	11.21
OB040	East Asian	454.69	2704.3	278.98	1483.71	168.15	455.97	401.54	251.97	15595.6	15501	94.58
OB043	East Asian	106.95	3799.43	378.05	2634.37	703.05	369.74	192.96	137.55	10242.5	10219.7	22.77
OB051	East Asian	275.87	2226.65	219.91	1287.84	389.33	396.61	292.19	155.16	7647.3	7621.16	26.14
OB070	East Asian	-38.55	4400.19	301.69	3705.73	74.63	586.13	492.72	347.42	2929.87	2873.02	56.84
OB079	East Asian	280.31	3592.32	397.25	1836.18	436.24	217.48	192.98	122.54	2486.59	2478.63	7.96
OB084	East Asian	221.2	4311.44	376.77	2073.06	106.69	931.59	782.31	523.25	5398.06	5384.09	13.96
OB085	East Asian	257.41	4014.31	365.28	2294.51	154.09	450.12	457.71	206.6	3910.16	3898.75	11.42
OB088	East Asian	149.75	4444.24	328.99	1383.15	74.08	833.88	800.26	418.78	11462.2	11400.1	62.12
OB018	White	46.68	1809.2	224.59	1103.67	205.04	1396.69	1324.08	895.92	11098.4	11089	9.4
OB039	White	135.4	1479.32	212.25	971.45	240.51	930.53	907.16	614.87	12524.1	12429.6	94.5
OB046	White	68.85	1011.89	151.44	107.98	123.12	164.33	172.77	86.52	9961.64	9949.75	11.89
OB059	White	37.23	1476.12	195.87	902.88	136.54	88.51	85.35	58.59	7904.25	7827	77.25
OB063	White	45.12	1615.99	194.68	449.9	176.22	240.25	279.84	151.06	956.83	950.73	6.11
OB064	White	182.16	1607.51	217.36	1558.69	272.6	291.26	212.41	122.21	3047.27	3026.55	20.72
OB067	White	107.49	2773.64	279.64	1306.34	357.06	272.34	196.69	119.02	9031.99	9002.27	29.73
OB069	White	7.9	2283.88	211.24	1309.68	242.38	210.66	176.52	114.17	3207.47	3199.45	8.02
OB071	White	96.57	4574.29	431.94	4030.3	360.64	684.85	476.4	358.29	4302.2	4201.09	101.1
OB081	White	92.39	2005.45	218.51	2898.26	241.56	154.91	114.25	66.79	9744.81	9699.09	45.71
East Asian (mean)		223.495	3821.29	367.802	2243.66	296.917	516.85	435.713	269.239	8149.16	8111.45	37.704
White (mean)		81.979	2063.73	233.752	1463.91	235.567	443.433	394.547	258.744	7177.9	7137.46	40.443
p-value		0.008	0.002	0.025	0.18	0.424	0.637	0.781	0.917	0.654	0.652	0.859
Fold-change		2.72625	1.85165	1.57347	1.53265	1.26044	1.16557	1.10434	1.04056	1.13531	1.13646	0.932275
Between group p-values are calculated using Student's t test comparing between ethnicities.

## Sheet: Supplementary File 1F
Supplementary File 1F. ASA24 data for East Asian and White subjects stratified by BMI classification.
Nutrients	Lean			Obese
	East Asian (n=12)	White (n=11)	adjusted p-value	East Asian (n=10)	White (n=13)	adjusted p-value
Energy (kcal)	1690 ± 739	2010 ± 886	0.6525	2450 ± 1260	1440 ± 911	0.232
Protein (g)	72.5 ± 34.7	69.2 ± 32.7	0.94	94.9 ± 47.3	65.4 ± 47.3	0.3625
Fat (g)	69.1 ± 31.8	78.6 ± 45.9	0.787143	106 ± 65.7	61.9 ± 47.0	0.293222
Fatty acids, total saturated (g)	17.5 ± 10.2	19.6 ± 11.1	0.856818	30.4 ± 16.8	14.7 ± 10.4	0.232
Carbohydrate (g)	199 ± 109	273 ± 125	0.3625	284 ± 159	162 ± 110	0.232
Sugars, total (g)	72.9 ± 38.1	129 ± 72.7	0.232	107 ± 83.3	74.0 ± 66.8	0.618667
Calcium (mg)	1020 ± 563	989 ± 650	0.94	998 ± 698	1070 ± 507	0.94
Sodium (mg)	2970 ± 1210	2620 ± 1240	0.763158	4400 ± 1660	2620 ± 1560	0.232
Fiber, total dietary (g)	22.0 ± 9.53	33.6 ± 22.0	0.3625	18.8 ± 9.81	13.3 ± 11.0	0.455714
Alcohol (g)	2.02 ± 6.99	1.10 ± 3.65	0.87	0 ± 0	0 ± 0	NA
Caffeine (mg)	103 ± 103	143 ± 125	0.699412	110 ± 118	115 ± 165	0.94
Dairy (cups)	0.737 ± 0.724	0.976 ± 0.901	0.763158	1.20 ± 1.18	0.935 ± 1.01	0.787143
Fruits (cups)	1.69 ± 1.38	2.87 ± 2.54	0.423846	1.60 ± 1.74	0.288 ± 0.484	0.232
Vegetables (cups)	1.78 ± 1.38	3.53 ± 2.70	0.26825	2.01 ± 1.44	0.811 ± 0.797	0.232
Seafood (oz)	0.905 ± 1.80	1.04 ± 1.91	0.94	0.770 ± 1.28	0.723 ± 1.72	0.94
Values are mean ± SD. ASA24 is a self administered 24-hour dietary recall assessment of dietary content. p-values are from Benjamini-Hochberg adjusted Student's t tests. Seafood (oz) reflects total amount of Seafood consumed by combining two seafood groups stratified by high and low for ⍵-3 fatty acids.

## Sheet: Supplementary File 1G
Supplementary File 1G. DHQIII data for East Asian and White subjects stratified by BMI classification.
Nutrients	Lean			Obese
	East Asian (n=12)	White (n=11)	adjusted p-value	East Asian (n=10)	White (n=13)	adjusted p-value
Energy (kcal)	2150 ± 1120	2180 ± 1600	0.97	2260 ± 1540	2910 ± 1150	0.665
Protein (g)	79.3 ± 45.7	89.4 ± 58.7	0.827273	102 ± 79.7	120 ± 53.9	0.811034
Total fat (g)	70.6 ± 35.8	85.7 ± 66.7	0.793333	86.0 ± 52.4	113 ± 45.2	0.665
Total saturated fatty acids (g)	21.8 ± 12.6	30.3 ± 27.0	0.665	28.6 ± 18.6	34.9 ± 14.3	0.665
Total monounsaturated fatty acids (g)	25.6 ± 13.1	30.5 ± 23.1	0.81	30.7 ± 18.8	42.1 ± 15.9	0.665
Total polyunsaturated fatty acids (g)	17.2 ± 9.26	17.3 ± 11.4	0.97	18.9 ± 10.4	26.0 ± 12.6	0.665
Cholesterol (mg)	253 ± 147	337 ± 261	0.665	323 ± 156	389 ± 230	0.7056
Carbohydrate (g)	296 ± 169	265 ± 199	0.851053	271 ± 184	359 ± 153	0.665
Total sugars (g)	146 ± 105	142 ± 121	0.97	125 ± 102	162 ± 87.7	0.665
Dietary fiber (g)	28.2 ± 16.5	20.9 ± 11.2	0.665	23.1 ± 19.5	34.6 ± 18.4	0.665
Calcium (mg)	1100 ± 922	1310 ± 1170	0.826875	1240 ± 1130	1450 ± 583	0.826452
Sodium (mg)	3650 ± 1730	3400 ± 1980	0.851053	4220 ± 2720	5240 ± 2190	0.665
Aspartame (mg)	14.4 ± 21.7	12.2 ± 12.9	0.851053	29.4 ± 59.7	8.30 ± 11.8	0.665
Saccharin (mg)	0.634 ± 1.55	0.449 ± 0.903	0.851053	1.29 ± 2.34	3.30 ± 7.60	0.665
Mannitol (g)	0.585 ± 0.409	0.322 ± 0.245	0.665	0.330 ± 0.302	0.667 ± 0.679	0.665
Caffeine (mg)	162 ± 122	245 ± 174	0.665	125 ± 104	171 ± 171	0.710769
Alcohol (g)	8.88 ± 15.3	3.85 ± 4.91	0.665	4.24 ± 10.3	5.62 ± 10.1	0.851053
Total dairy (cups)	1.43 ± 1.79	2.55 ± 2.95	0.665	2.22 ± 2.56	1.74 ± 0.876	0.812
Total fruit (cups)	2.36 ± 1.66	1.61 ± 1.28	0.665	1.55 ± 1.35	2.25 ± 1.47	0.665
Total vegetable (cups)	3.18 ± 2.07	2.26 ± 1.31	0.665	2.61 ± 2.50	4.02 ± 4.04	0.665
Seafood (oz)	0.948 ± 0.904	0.917 ± 0.836	0.97	1.09 ± 1.13	1.68 ± 1.40	0.665
Values are mean ± SD. DHQIII consists of 135 food and beverage line items and 26 dietary supplement questions. p-values are from Benjamini-Hochberg adjusted Student's t tests. Seafood (oz) reflects total amount of Seafood consumed by combining two seafood groups stratified by high and low for ⍵-3 fatty acids.

## Sheet: Supplementary File 1H
Supplementary File 1H. Features of human donors used for gnotobiotic experiments.
LFPP1 Exp	East Asian (n=1)	White (n=1)		HFHS Exp	East Asian (n=5)	White (n=5)	p-value		LFPP2 Exp	East Asian (n=1)	White (n=1)
Age, years
Value	52	30		Mean ± SD	36.4 ± 9.91	32.6 ± 2.70	0.45		Value	27	32
Sex, n (%)
Female	1 (100%)	1 (100%)		Female	3 (60.0%)	3 (60.0%)	1		Female	0 (0%)	0 (0%)
Male	0 (0%)	0 (0%)		Male	2 (40.0%)	2 (40.0%)			Male	1 (100%)	1 (100%)
Diabetes, n (%)
Y	0 (0%)	0 (0%)		Y	0 (0%)	0 (0%)	NA		Y	0 (0%)	0 (0%)
N	1 (100%)	1 (100%)		N	5 (100%)	5 (100%)			N	1 (100%)	1 (100%)
BMI, kg/m2
Value	19.7	20.5		Mean ± SD	22.6 ± 1.92	22.4 ± 1.80	0.9		Value	24.3	20.7
Fat Mass, g
Value	16000	14600		Mean ± SD	17400 ± 2920	20200 ± 4570	0.3		Value	14000	16800
Free Fat Mass, g
Value	27300	38800		Mean ± SD	39400 ± 8270	47400 ± 11700	0.3		Value	50000	56000
VAT mass, g
Value	122	99		Mean ± SD	204 ± 75.5	230 ± 82.7	0.62		Value	235	305
HOMA-IR
Value	1	1		Mean ± SD	1.60 ± 0.894	1.40 ± 0.894	0.73		Value	1	1
Values for each variable are shown for the individual donors used in the LFPP experiments. Median ± SD (Standard Deviation) or n (%) are shown for each group of 5 donors for the HFHS experiment. Between group p-values are calculated using Student's t test between ethnicities for the HFHS experiment. Pearson's χ2 test resulted in an NA value due to sample distribution between EA and W subjects for…

## Sheet: Supplementary File 1I
Supplementary File 1I. 16S-seq sample information for gnotobiotic experiments.
Experiment	Mouse ID	16S raw reads	16S filtered reads	Sequencing ID	Index1	Index2	Sample type	Donor ID	Recipient cage	Days from colonization	Collection date	Diet	Donor ethnicity	Mouse sex
LFPP1	NA	17700	16091	IDEO1_donor_OB051	ATTACTCG	ATAGAGGC	Input slurry	OB051	NA	0	2017-09-01	NA	East Asian	NA
LFPP1	NA	32014	29391	IDEO1_donor_OB064	ATTACTCG	TATAGCCT	Input slurry	OB064	NA	0	2017-09-01	NA	White	NA
LFPP1	M1	46307	42702	IDEO1_M1-1	ATTACTCG	CCTATCCT	Stool	OB064	M1	41	2017-10-12	LFPP	White	Male
LFPP1	M2	45730	42702	IDEO1_M1-2	ATTACTCG	GGCTCTGA	Stool	OB064	M1	41	2017-10-12	LFPP	White	Male
LFPP1	M3	44810	41774	IDEO1_M1-3	ATTACTCG	AGGCGAAG	Stool	OB064	M1	41	2017-10-12	LFPP	White	Male
LFPP1	M4	48599	45072	IDEO1_M2-4	ATTACTCG	TAATCTTA	Stool	OB064	M2	41	2017-10-12	LFPP	White	Male
LFPP1	M5	38309	35367	IDEO1_M2-5	ATTACTCG	AAGGAGTA	Stool	OB064	M2	41	2017-10-12	LFPP	White	Male
LFPP1	M6	25333	22103	IDEO1_M2-6	ATTACTCG	GTACTGAC	Stool	OB064	M2	41	2017-10-12	LFPP	White	Male
LFPP1	M7	36919	33793	IDEO1_O1-1	TCCGGAGA	TATAGCCT	Stool	OB051	O1	41	2017-10-12	LFPP	East Asian	Male
LFPP1	M8	25548	21571	IDEO1_O1-2	TCCGGAGA	ATAGAGGC	Stool	OB051	O1	41	2017-10-12	LFPP	East Asian	Male
LFPP1	M9	42682	39525	IDEO1_O1-3	TCCGGAGA	CCTATCCT	Stool	OB051	O1	41	2017-10-12	LFPP	East Asian	Male
LFPP1	M10	38593	36059	IDEO1_O2-4	TCCGGAGA	GGCTCTGA	Stool	OB051	O2	41	2017-10-12	LFPP	East Asian	Male
LFPP1	M11	35121	32694	IDEO1_O2-5	TCCGGAGA	AGGCGAAG	Stool	OB051	O2	41	2017-10-12	LFPP	East Asian	Male
LFPP1	M12	47659	44601	IDEO1_O2-6	TCCGGAGA	TAATCTTA	Stool	OB051	O2	41	2017-10-12	LFPP	East Asian	Male
LFPP2	M13	26715	24635	IDEO2_7_1	CGCTCATT	TATAGCCT	Stool	OB069	7A	21	2018-08-01	LFPP	White	Male
LFPP2	M14	14660	12963	IDEO2_7_2	CGCTCATT	ATAGAGGC	Stool	OB069	7A	21	2018-08-01	LFPP	White	Male
LFPP2	M15	42521	39256	IDEO2_7_3	CGCTCATT	CCTATCCT	Stool	OB069	7B	21	2018-08-01	LFPP	White	Male
LFPP2	M16	34200	31800	IDEO2_7_4	CGCTCATT	GGCTCTGA	Stool	OB069	7B	21	2018-08-01	LFPP	White	Male
LFPP2	M17	41871	39145	IDEO2_7_5	CGCTCATT	AGGCGAAG	Stool	OB069	7C	21	2018-08-01	LFPP	White	Male
LFPP2	M18	46761	43431	IDEO2_7_6	CGCTCATT	TAATCTTA	Stool	OB069	7C	21	2018-08-01	LFPP	White	Male
LFPP2	M19	43820	40634	IDEO2_8_1	CGCTCATT	AAGGAGTA	Stool	OB084	8A	21	2018-08-01	LFPP	East Asian	Male
LFPP2	M20	39615	35662	IDEO2_8_2	CGCTCATT	GTACTGAC	Stool	OB084	8A	21	2018-08-01	LFPP	East Asian	Male
LFPP2	M21	47515	44054	IDEO2_8_3	GAGATTCC	TATAGCCT	Stool	OB084	8B	21	2018-08-01	LFPP	East Asian	Male
LFPP2	M22	41776	38156	IDEO2_8_4	GAGATTCC	ATAGAGGC	Stool	OB084	8B	21	2018-08-01	LFPP	East Asian	Male
LFPP2	M23	47560	44302	IDEO2_8_5	GAGATTCC	CCTATCCT	Stool	OB084	8C	21	2018-08-01	LFPP	East Asian	Male
LFPP2	M24	62003	58066	IDEO2_8_6	GAGATTCC	GGCTCTGA	Stool	OB084	8C	21	2018-08-01	LFPP	East Asian	Male
LFPP2	NA	14244	11071	IDEO2_donor_OB069	TCCGGAGA	AAGGAGTA	Input slurry	OB069	NA	0	2018-07-10	NA	White	NA
LFPP2	NA	20610	19255	IDEO2_donor_OB084	TCCGGAGA	GTACTGAC	Input slurry	OB084	NA	0	2018-07-10	NA	East Asian	NA
HFHS	NA	33266	31218	IDEO4_donor_B	GAGATTCC	TAATCTTA	Input slurry	OB051	NA	0	2019-07-22	NA	East Asian	NA
HFHS	NA	39730	37474	IDEO4_donor_A	GAGATTCC	AGGCGAAG	Input slurry	OB064	NA	0	2019-07-22	NA	White	NA
HFHS	NA	35260	33049	IDEO4_donor_C	GAGATTCC	AAGGAGTA	Input slurry	OB069	NA	0	2019-07-22	NA	White	NA
HFHS	NA	31080	28659	IDEO4_donor_D	GAGATTCC	GTACTGAC	Input slurry	OB084	NA	0	2019-07-22	NA	East Asian	NA
HFHS	NA	21272	19132	IDEO4_donor_F	ATTCAGAA	ATAGAGGC	Input slurry	OB026	NA	0	2019-08-16	NA	East Asian	NA
HFHS	NA	33279	30842	IDEO4_donor_G	ATTCAGAA	CCTATCCT	Input slurry	OB045	NA	0	2019-08-16	NA	White	NA
HFHS	NA	42547	38543	IDEO4_donor_E	ATTCAGAA	TATAGCCT	Input slurry	OB063	NA	0	2019-08-16	NA	White	NA
HFHS	NA	35645	33506	IDEO4_donor_H	ATTCAGAA	GGCTCTGA	Input slurry	OB070	NA	0	2019-08-16	NA	East Asian	NA
HFHS	NA	35881	32836	IDEO4_donor_K	ATTCAGAA	AAGGAGTA	Input slurry	OB051	NA	0	2019-08-26	NA	East Asian	NA
HFHS	NA	43407	40055	IDEO4_donor_J	ATTCAGAA	TAATCTTA	Input slurry	OB078	NA	0	2019-08-26	NA	East Asian	NA
HFHS	NA	38143	35668	IDEO4_donor_I	ATTCAGAA	AGGCGAAG	Input slurry	OB081	NA	0	2019-08-26	NA	White	NA
HFHS	M40	29998	27540	IDEO4_I_1	CTGAAGCT	AAGGAGTA	Stool	OB081	I	17	2019-09-12	HFHS	White	Male
HFHS	M41	31464	27873	IDEO4_I_2	CTGAAGCT	GTACTGAC	Stool	OB081	I	17	2019-09-12	HFHS	White	Male
HFHS	M42	26483	23836	IDEO4_J_3	TAATGCGC	TATAGCCT	Stool	OB078	J	17	2019-09-12	HFHS	East Asian	Male
HFHS	M43	16355	14138	IDEO4_J_4	TAATGCGC	ATAGAGGC	Stool	OB078	J	17	2019-09-12	HFHS	East Asian	Male
HFHS	M44	33253	30329	IDEO4_K_5	TAATGCGC	CCTATCCT	Stool	OB051	K	17	2019-09-12	HFHS	East Asian	Male
HFHS	M25	25962	22588	IDEO4_A_1	ATTCAGAA	GTACTGAC	Stool	OB064	A	21	2019-08-12	HFHS	White	Male
HFHS	M26	29432	26834	IDEO4_A_2	GAATTCGT	TATAGCCT	Stool	OB064	A	21	2019-08-12	HFHS	White	Male
HFHS	M27	24021	21598	IDEO4_B_3	GAATTCGT	ATAGAGGC	Stool	OB051	B	21	2019-08-12	HFHS	East Asian	Male
HFHS	M28	41042	38030	IDEO4_C_5	GAATTCGT	CCTATCCT	Stool	OB069	C	21	2019-08-12	HFHS	White	Male
HFHS	M29	28342	26536	IDEO4_C_6	GAATTCGT	GGCTCTGA	Stool	OB069	C	21	2019-08-12	HFHS	White	Male
HFHS	M30	36103	33225	IDEO4_C_7	GAATTCGT	AGGCGAAG	Stool	OB084	D	21	2019-08-12	HFHS	East Asian	Male
HFHS	M31	40131	37426	IDEO4_C_8	GAATTCGT	TAATCTTA	Stool	OB084	D	21	2019-08-12	HFHS	East Asian	Male
HFHS	M32	38703	35637	IDEO4_E_1	GAATTCGT	AAGGAGTA	Stool	OB063	E	21	2019-09-06	HFHS	White	Male
HFHS	M33	30346	27142	IDEO4_E_2	GAATTCGT	GTACTGAC	Stool	OB063	E	21	2019-09-06	HFHS	White	Male
HFHS	M34	33168	29826	IDEO4_F_3	CTGAAGCT	TATAGCCT	Stool	OB026	F	21	2019-09-06	HFHS	East Asian	Male
HFHS	M35	8597	6859	IDEO4_F_4	CTGAAGCT	ATAGAGGC	Stool	OB026	F	21	2019-09-06	HFHS	East Asian	Male
HFHS	M36	37136	33805	IDEO4_G_5	CTGAAGCT	CCTATCCT	Stool	OB045	G	21	2019-09-06	HFHS	White	Male
HFHS	M37	47406	43723	IDEO4_G_6	CTGAAGCT	GGCTCTGA	Stool	OB045	G	21	2019-09-06	HFHS	White	Male
HFHS	M38	49971	45925	IDEO4_H_7	CTGAAGCT	AGGCGAAG	Stool	OB070	H	21	2019-09-06	HFHS	East Asian	Male
HFHS	M39	52685	48261	IDEO4_H_8	CTGAAGCT	TAATCTTA	Stool	OB070	H	21	2019-09-06	HFHS	East Asian	Male
Abbreviations: NA, not applicable. LFPP, low-fat high-plant-polysaccharide. HFHS, high-fat high-sugar.

## Sheet: Supplementary File 1J
Supplementary File 1J. Differentially abundant genera between transplant groups in gnotobiotic experiments.
Experiments	Diet	Associated Figure	Phylum	Class	Order	Family	Genus	p-value	FDR	Log2 fold difference (EA/W)
LFPP1 + LFPP2	LFPP	Figure 7D	Firmicutes	Clostridia	Lachnospirales	Lachnospiraceae	Lachnoclostridium	4.35e-06	0.00032	3.031
LFPP1 + LFPP2	LFPP	Figure 7D	Firmicutes	Bacilli	Erysipelotrichales	Erysipelotrichaceae	[Clostridium] innocuum group	1.51e-05	0.000424	3.939
LFPP1 + LFPP2	LFPP	Figure 7D	Bacteroidota	Bacteroidia	Bacteroidales	Bacteroidaceae	Bacteroides	2.6e-05	0.000489	3.142
LFPP1 + LFPP2	LFPP	Figure 7D	Firmicutes	Clostridia	Lachnospirales	Lachnospiraceae	Eisenbergiella	3.11e-05	0.000496	3.085
LFPP1 + LFPP2	LFPP	Figure 7D	Firmicutes	Clostridia	Lachnospirales	Lachnospiraceae	Blautia	3.47e-05	0.000508	2.88
LFPP1 + LFPP2	LFPP	Figure 7D	Bacteroidota	Bacteroidia	Bacteroidales	Tannerellaceae	Parabacteroides	5.71e-05	0.000608	2.463
LFPP1 + LFPP2	LFPP	Figure 7D	Proteobacteria	Gammaproteobacteria	Burkholderiales	Sutterellaceae	Parasutterella	8.92e-05	0.000749	2.719
LFPP1 + LFPP2	LFPP	Figure 7D	Firmicutes	Clostridia	Oscillospirales	Oscillospiraceae	Flavonifractor	0.000111	0.000846	3.031
LFPP1 + LFPP2	LFPP	Figure 7D	Firmicutes	Bacilli	Erysipelotrichales	Erysipelotrichaceae	Holdemania	0.000151	0.000938	4.407
LFPP1 + LFPP2	LFPP	Figure 7D	Firmicutes	Clostridia	Lachnospirales	Lachnospiraceae	Marvinbryantia	0.000156	0.001	-9.209
LFPP1 + LFPP2	LFPP	Figure 7D	Firmicutes	Clostridia	Oscillospirales	Ruminococcaceae	UBA1819	0.000258	0.001	6.982
LFPP1 + LFPP2	LFPP	Figure 7D	Firmicutes	Clostridia	Peptostreptococcales-Tissierellales	Peptostreptococcaceae	Romboutsia	0.000264	0.001	-7.219
LFPP1 + LFPP2	LFPP	Figure 7D	Actinobacteriota	Coriobacteriia	Coriobacteriales	Eggerthellaceae	Adlercreutzia	0.000363	0.002	2.125
LFPP1 + LFPP2	LFPP	Figure 7D	Firmicutes	Clostridia	Lachnospirales	Lachnospiraceae	[Ruminococcus] torques group	0.000425	0.002	2.942
LFPP1 + LFPP2	LFPP	Figure 7D	Firmicutes	Clostridia	Oscillospirales	Oscillospiraceae	Oscillibacter	0.000521	0.002	2.86
LFPP1 + LFPP2	LFPP	Figure 7D	Firmicutes	Clostridia	Oscillospirales	Oscillospiraceae	NA	0.000892	0.003	-5.193
LFPP1 + LFPP2	LFPP	Figure 7D	Proteobacteria	Alphaproteobacteria	Rhodospirillales	NA	NA	0.000971	0.004	-7.074
LFPP1 + LFPP2	LFPP	Figure 7D	Firmicutes	Clostridia	Oscillospirales	Ruminococcaceae	NA	0.001	0.004	3.548
LFPP1 + LFPP2	LFPP	Figure 7D	Bacteroidota	Bacteroidia	Bacteroidales	Muribaculaceae	NA	0.001	0.004	-6.869
LFPP1 + LFPP2	LFPP	Figure 7D	Bacteroidota	Bacteroidia	Bacteroidales	Barnesiellaceae	Barnesiella	0.001	0.005	-5.487
LFPP1 + LFPP2	LFPP	Figure 7D	Bacteroidota	Bacteroidia	Bacteroidales	Marinifilaceae	Butyricimonas	0.003	0.008	-5.513
LFPP1 + LFPP2	LFPP	Figure 7D	Firmicutes	Bacilli	Erysipelotrichales	Erysipelatoclostridiaceae	Erysipelatoclostridium	0.003	0.008	2.514
LFPP1 + LFPP2	LFPP	Figure 7D	Firmicutes	Clostridia	Lachnospirales	Lachnospiraceae	[Eubacterium] hallii group	0.003	0.01	-6.275
LFPP1 + LFPP2	LFPP	Figure 7D	Firmicutes	Clostridia	Lachnospirales	Lachnospiraceae	[Ruminococcus] gauvreauii group	0.005	0.011	-4.957
LFPP1 + LFPP2	LFPP	Figure 7D	Firmicutes	Bacilli	Erysipelotrichales	Erysipelotrichaceae	Faecalitalea	0.005	0.012	7.454
LFPP1 + LFPP2	LFPP	Figure 7D	Firmicutes	Clostridia	Lachnospirales	Lachnospiraceae	Sellimonas	0.009	0.018	7.785
LFPP1 + LFPP2	LFPP	Figure 7D	Firmicutes	Clostridia	Oscillospirales	Oscillospiraceae	Oscillospira	0.009	0.019	-4.64
LFPP1 + LFPP2	LFPP	Figure 7D	Desulfobacterota	Desulfovibrionia	Desulfovibrionales	Desulfovibrionaceae	Bilophila	0.01	0.02	8.319
LFPP1 + LFPP2	LFPP	Figure 7D	Firmicutes	Clostridia	Lachnospirales	Lachnospiraceae	Lachnospiraceae FCS020 group	0.011	0.023	-3.632
LFPP1 + LFPP2	LFPP	Figure 7D	Firmicutes	Clostridia	Lachnospirales	Lachnospiraceae	Tuzzerella	0.012	0.024	7.916
LFPP1 + LFPP2	LFPP	Figure 7D	Firmicutes	Clostridia	Lachnospirales	Lachnospiraceae	Lachnospiraceae UCG-006	0.015	0.03	-6.522
LFPP1 + LFPP2	LFPP	Figure 7D	Firmicutes	Clostridia	Peptococcales	Peptococcaceae	NA	0.016	0.031	-6.203
LFPP1 + LFPP2	LFPP	Figure 7D	Firmicutes	Clostridia	Peptostreptococcales-Tissierellales	Anaerovoracaceae	[Eubacterium] nodatum group	0.02	0.039	-5.64
LFPP1 + LFPP2	LFPP	Figure 7D	Fusobacteriota	Fusobacteriia	Fusobacteriales	Fusobacteriaceae	Fusobacterium	0.026	0.047	4.366
LFPP1 + LFPP2	LFPP	Figure 7D	Firmicutes	Clostridia	Oscillospirales	Oscillospiraceae	UCG-002	0.024	0.048	-2.398
LFPP1 + LFPP2	LFPP	Figure 7D	Firmicutes	Clostridia	Oscillospirales	Butyricicoccaceae	Butyricicoccus	0.024	0.049	2.232
LFPP1 + LFPP2	LFPP	Figure 7D	Firmicutes	Clostridia	Oscillospirales	Ruminococcaceae	Faecalibacterium	0.027	0.053	-7.355
LFPP1 + LFPP2	LFPP	Figure 7D	Firmicutes	Clostridia	Oscillospirales	Ruminococcaceae	[Eubacterium] siraeum group	0.033	0.059	-6.109
LFPP1 + LFPP2	LFPP	Figure 7D	Firmicutes	Clostridia	Oscillospirales	Oscillospiraceae	Colidextribacter	0.033	0.063	1.815
LFPP1 + LFPP2	LFPP	Figure 7D	Cyanobacteria	Vampirivibrionia	Gastranaerophilales	NA	NA	0.037	0.064	4.028
LFPP1 + LFPP2	LFPP	Figure 7D	Firmicutes	Clostridia	Lachnospirales	Lachnospiraceae	UC5-1-2E3	0.039	0.064	-4.097
LFPP1 + LFPP2	LFPP	Figure 7D	Firmicutes	Clostridia	Oscillospirales	[Eubacterium] coprostanoligenes group	NA	0.041	0.068	-4.903
LFPP1 + LFPP2	LFPP	Figure 7D	Firmicutes	Clostridia	Lachnospirales	Lachnospiraceae	[Eubacterium] ventriosum group	0.043	0.072	-3.342
LFPP1 + LFPP2	LFPP	Figure 7D	Firmicutes	Clostridia	Lachnospirales	Lachnospiraceae	Anaerostipes	0.05	0.082	-6.016
LFPP1 + LFPP2	LFPP	Figure 7D	Firmicutes	Clostridia	Lachnospirales	Lachnospiraceae	Lachnospiraceae ND3007 group	0.055	0.09	-3.851
HFHS	HFHS	Figure 7I	Firmicutes	Clostridia	Peptostreptococcales-Tissierellales	Anaerovoracaceae	[Eubacterium] nodatum group	0.002	0.043	-7.36
HFHS	HFHS	Figure 7I	Firmicutes	Clostridia	Eubacteriales	Eubacteriaceae	Eubacterium	0.007	0.063	7.971
HFHS	HFHS	Figure 7I	Firmicutes	Clostridia	Oscillospirales	Ruminococcaceae	UBA1819	0.005	0.08	1.685
HFHS	HFHS	Figure 7I	Firmicutes	Clostridia	Oscillospirales	Ruminococcaceae	Paludicola	0.005	0.082	-6.244
HFHS	HFHS	Figure 7I	Bacteroidota	Bacteroidia	Bacteroidales	Tannerellaceae	Parabacteroides	0.007	0.095	1.653
Table headings indicate experiment and closest taxonomic assignment. Uncorrected p-values in the p-value column underwent multiple test correction using the Benjamini-Hochberg method and resulting adjusted p-values are in the column labeled FDR.
