# Supplementary figures and images for: The East Asian gut microbiome is distinct from colocalized White subjects and connected to metabolic health
Source: eLife journal article supplement (doi:10.7554/elife.70349), 2021-10-07

**A**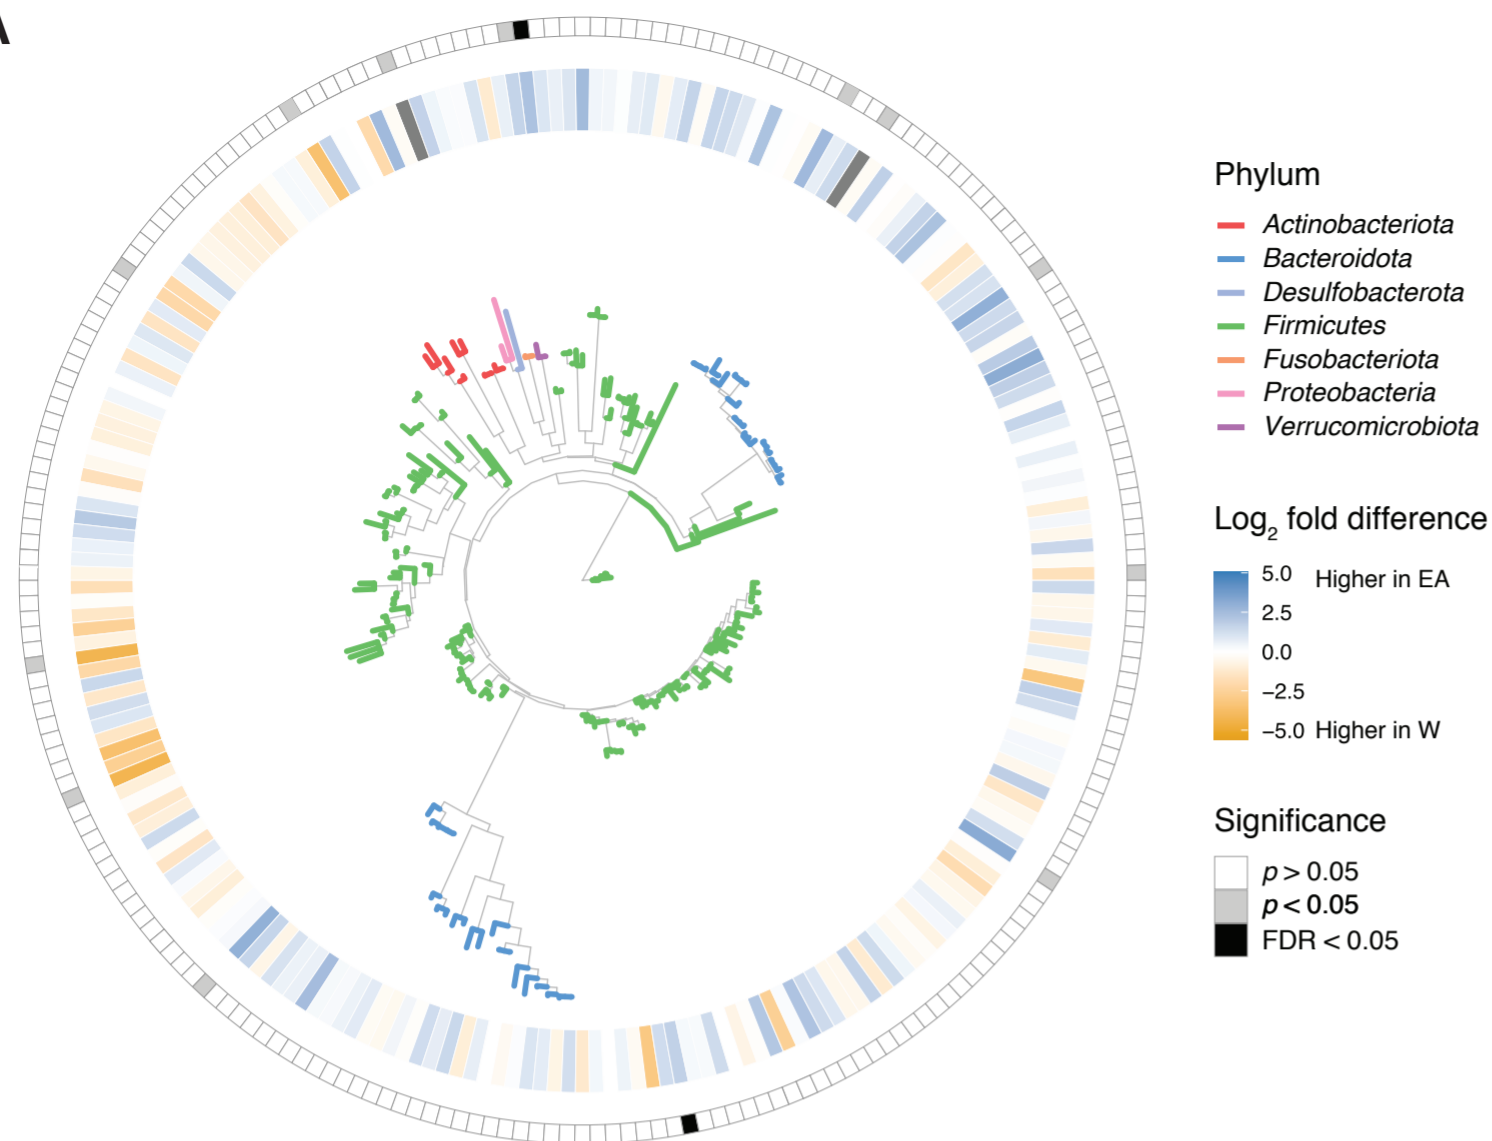**B**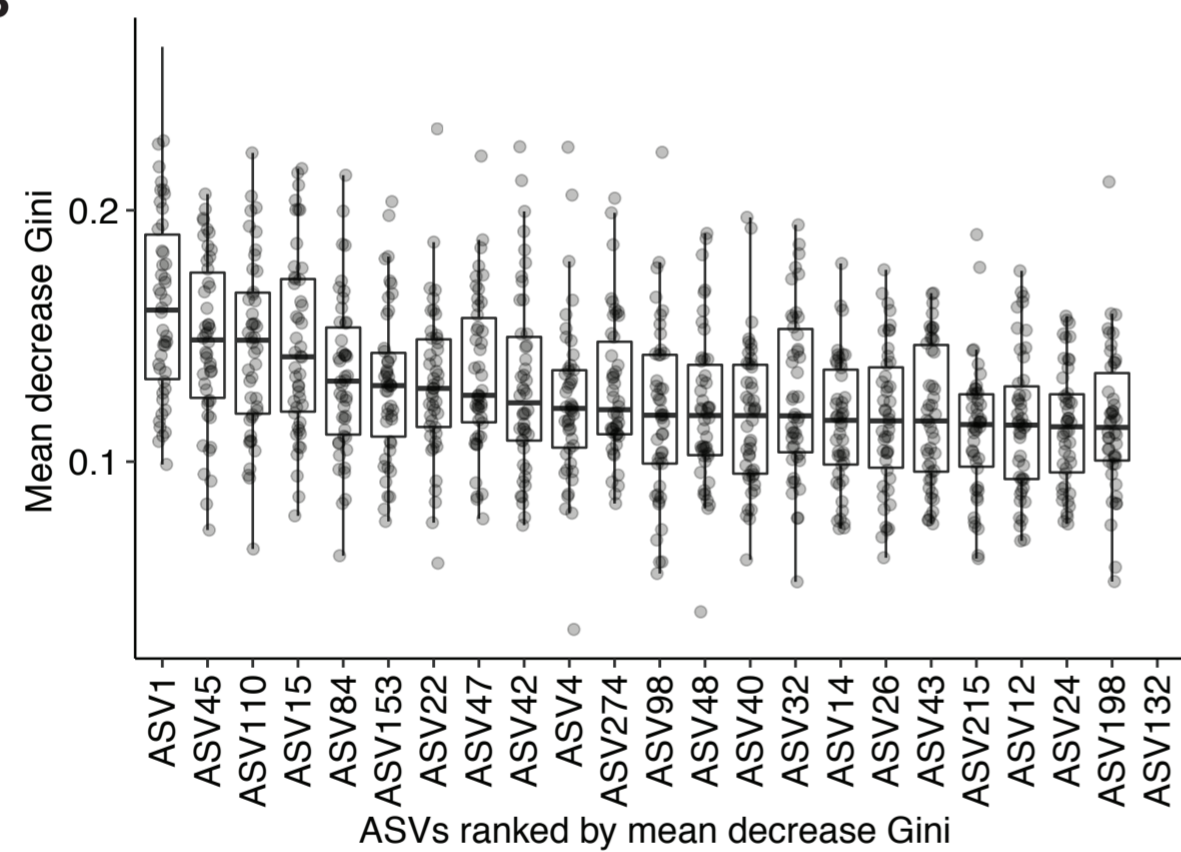**C**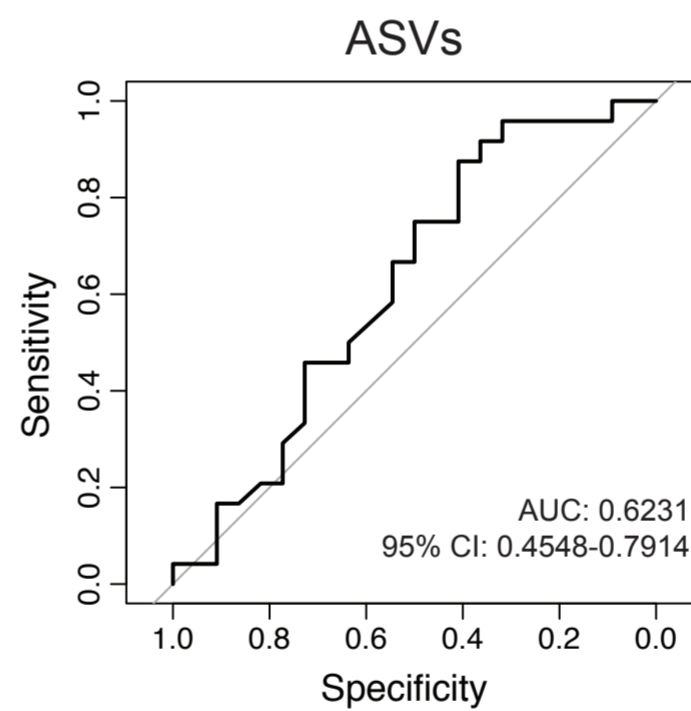**D**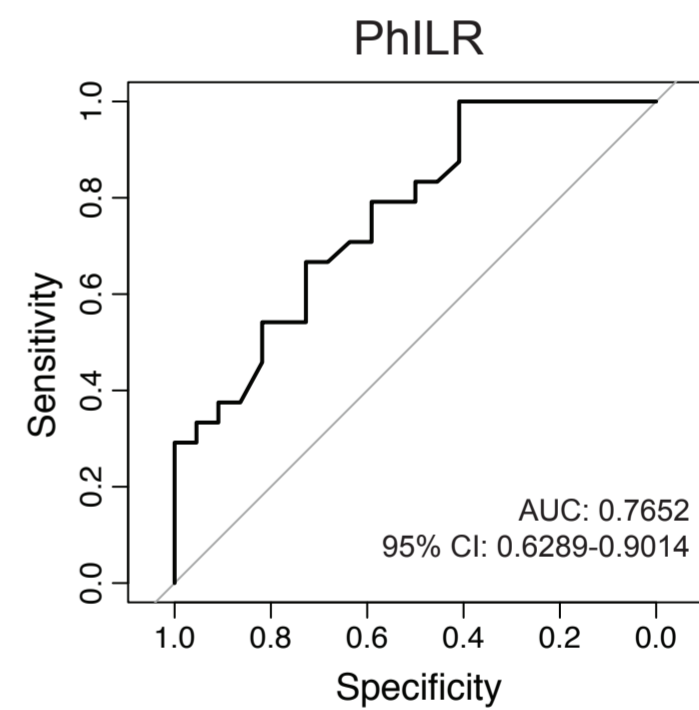**E**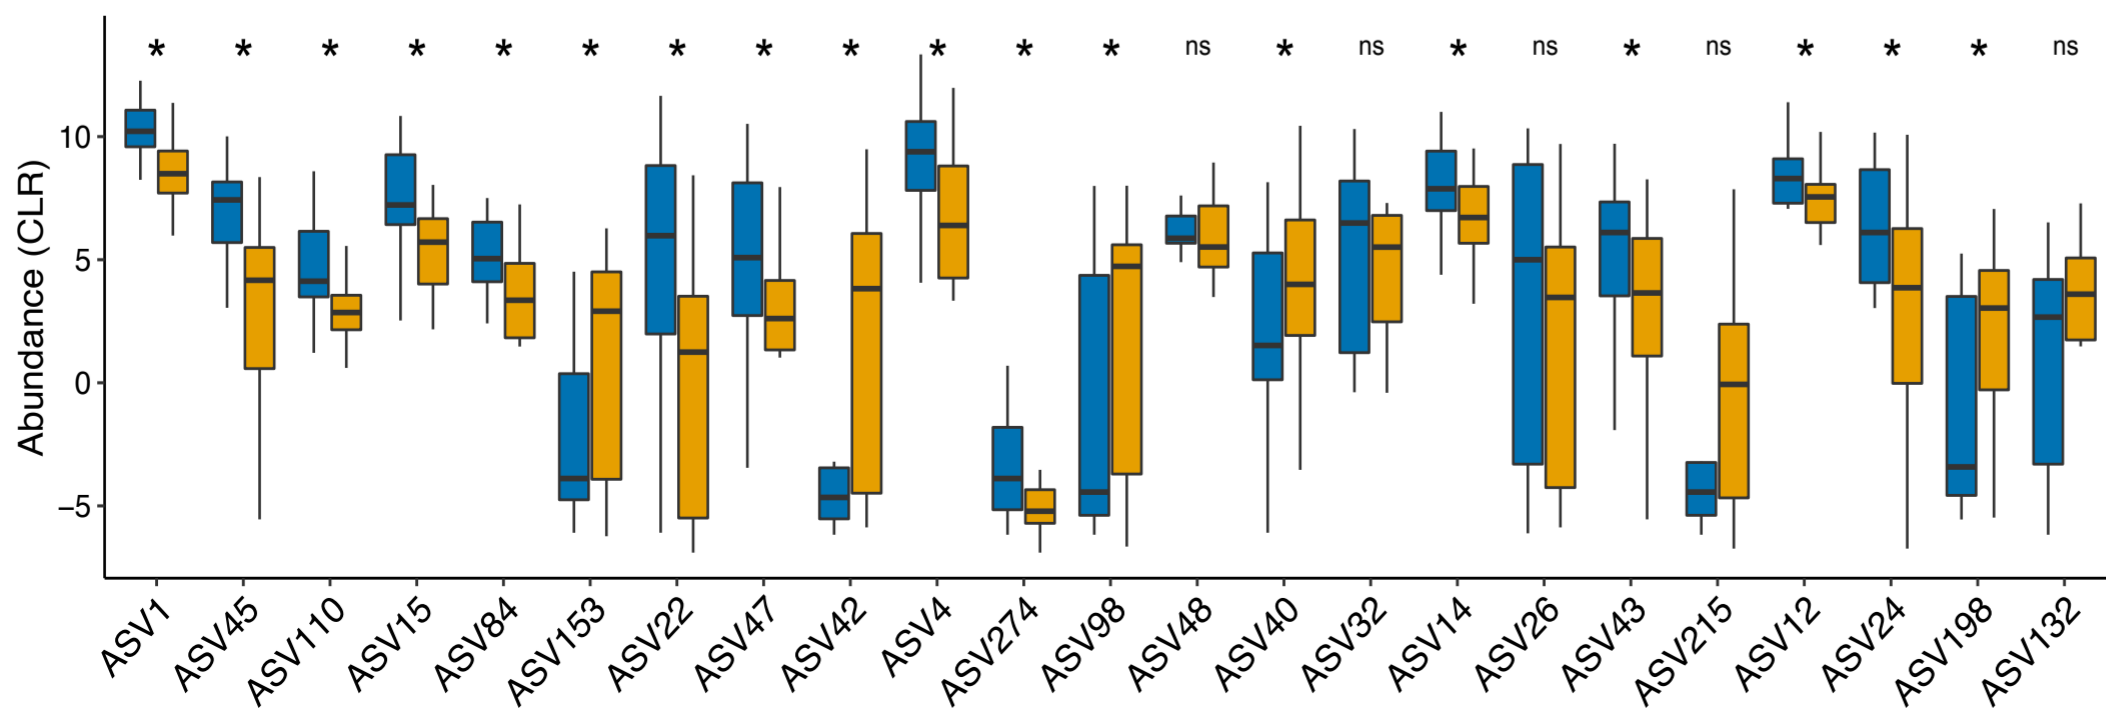**F**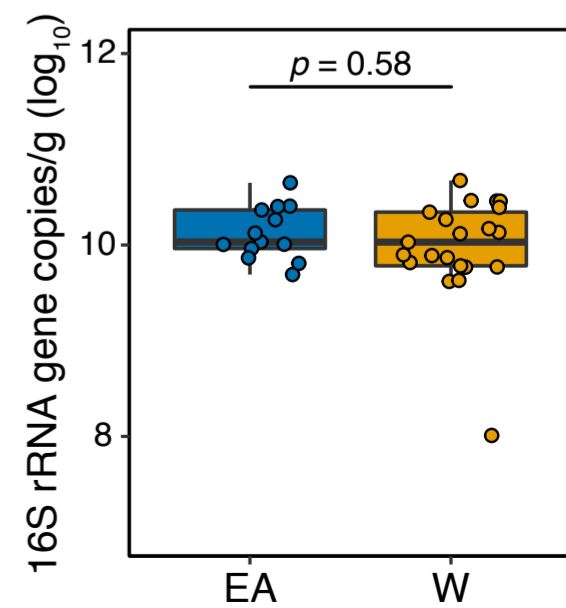

Supplement: supp [file elife-70349-supp-v2.zip › elife_poa_e70349_Figure_1_figure_supplement_1.pdf]

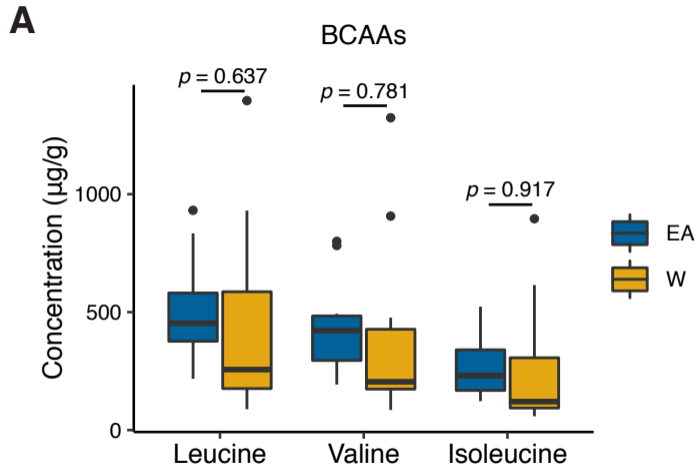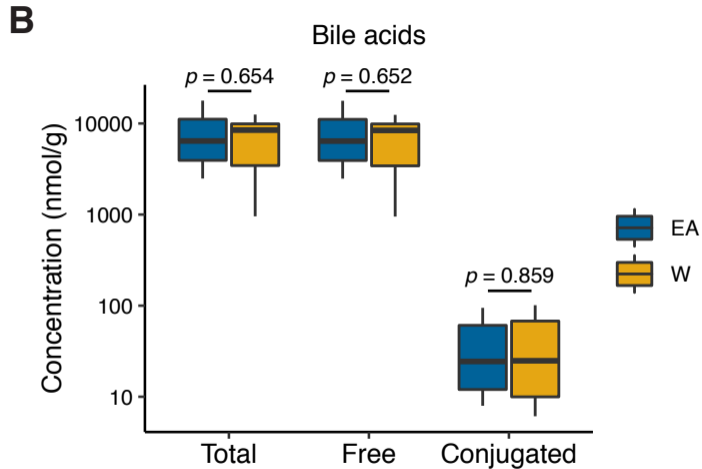

Supplement: supp [file elife-70349-supp-v2.zip › elife_poa_e70349_Figure_3_figure_supplement_1.pdf]

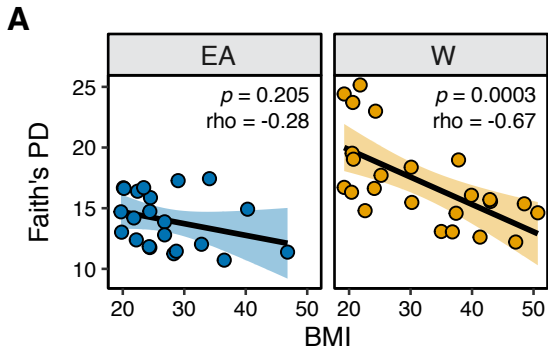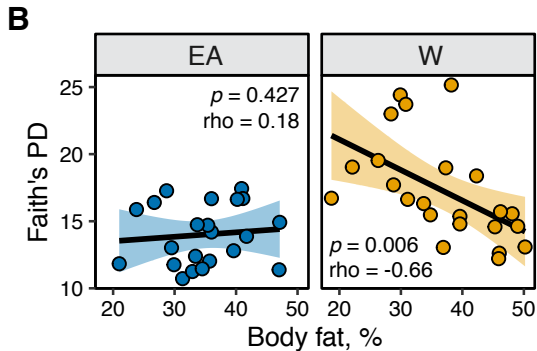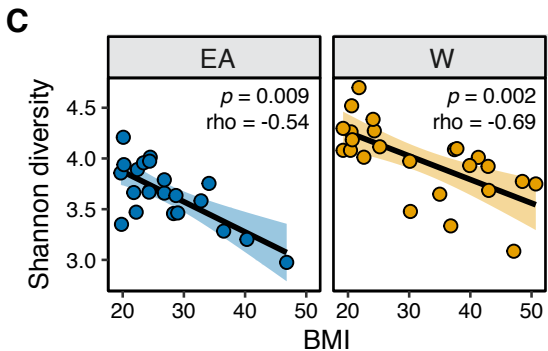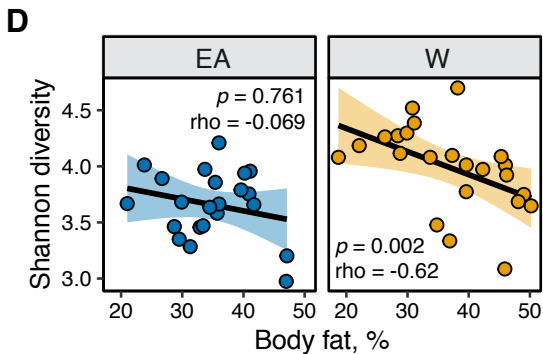

Supplement: supp [file elife-70349-supp-v2.zip › elife_poa_e70349_Figure_4_figure_supplement_1.pdf]

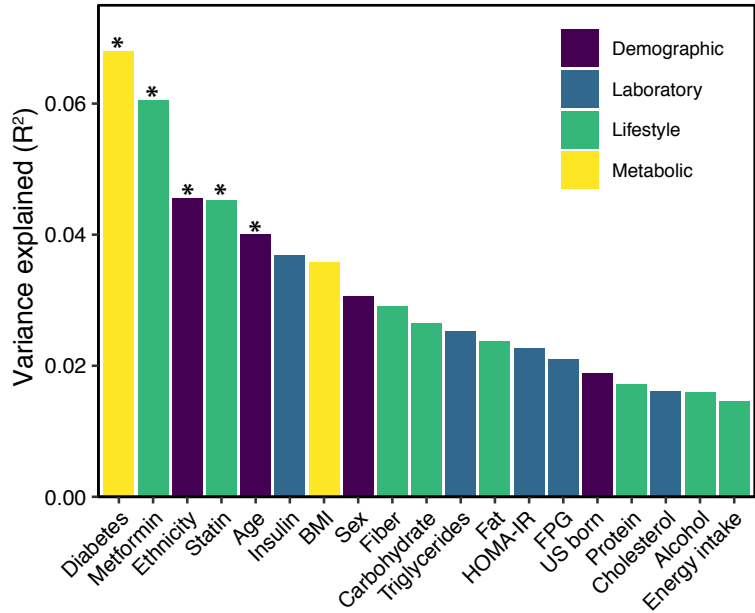

Supplement: supp [file elife-70349-supp-v2.zip › elife_poa_e70349_Figure_6_figure_supplement_1.pdf]

A

Lean W

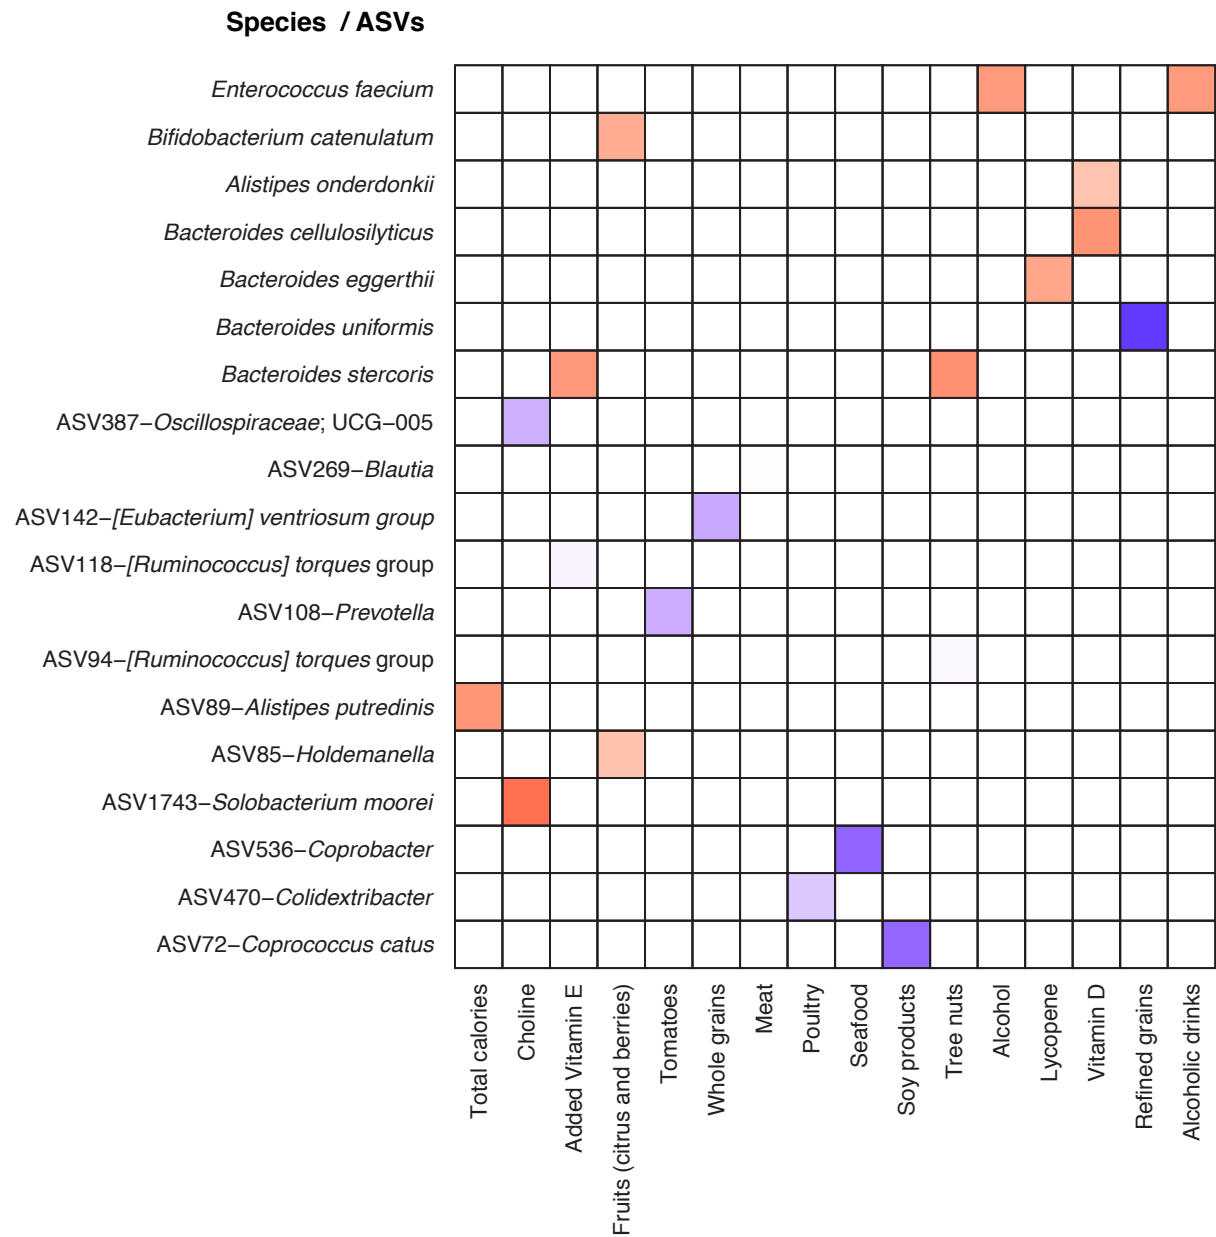

B

Lean EA

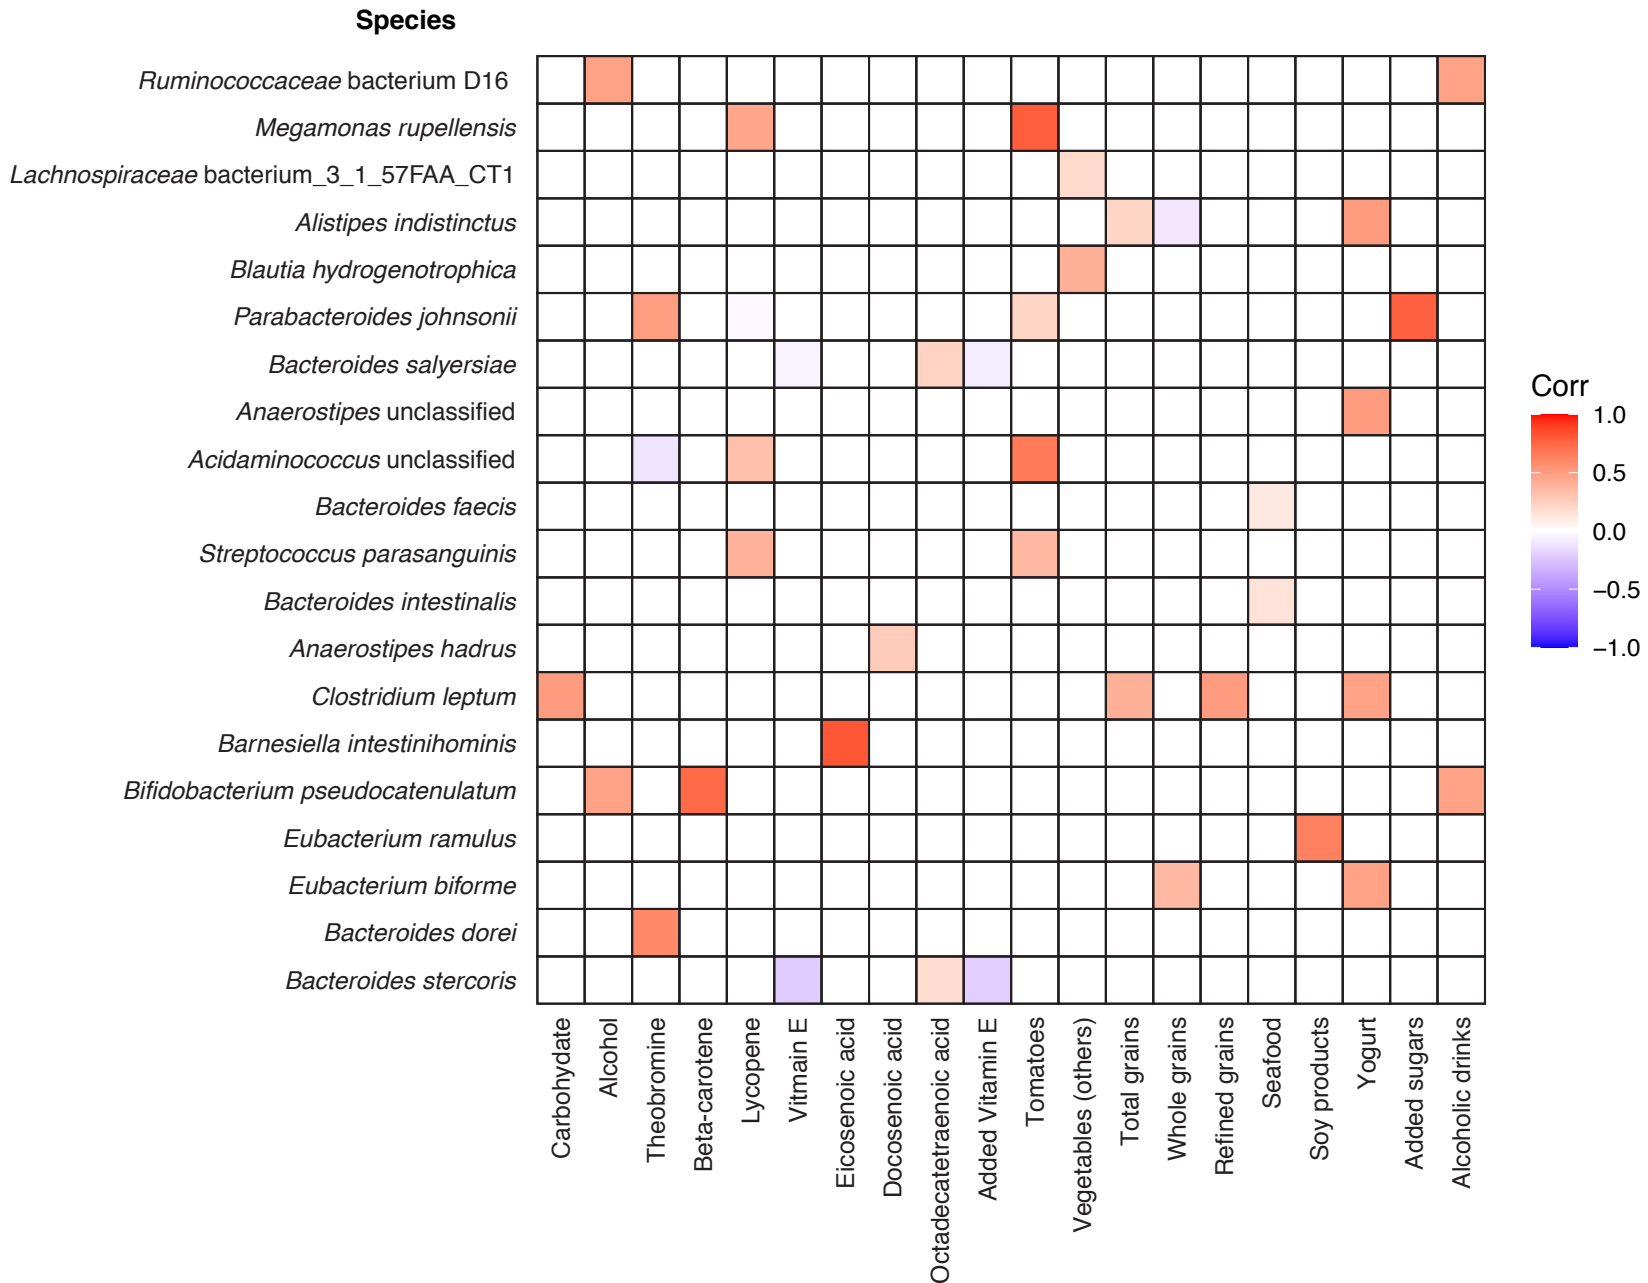

Supplement: supp [file elife-70349-supp-v2.zip › elife_poa_e70349_Figure_6_figure_supplement_3.pdf]

**A**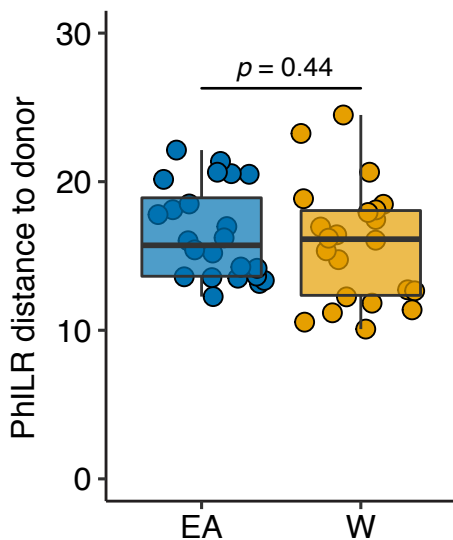**B**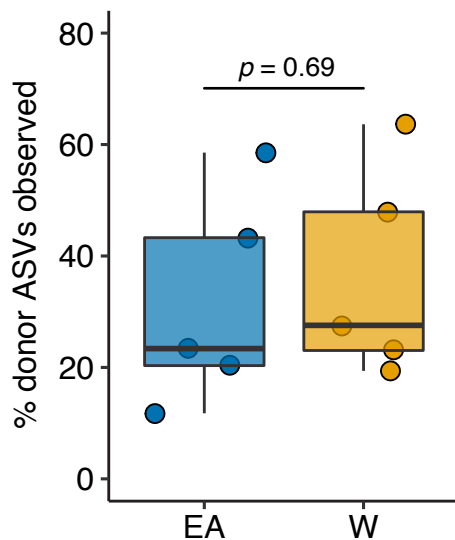**C**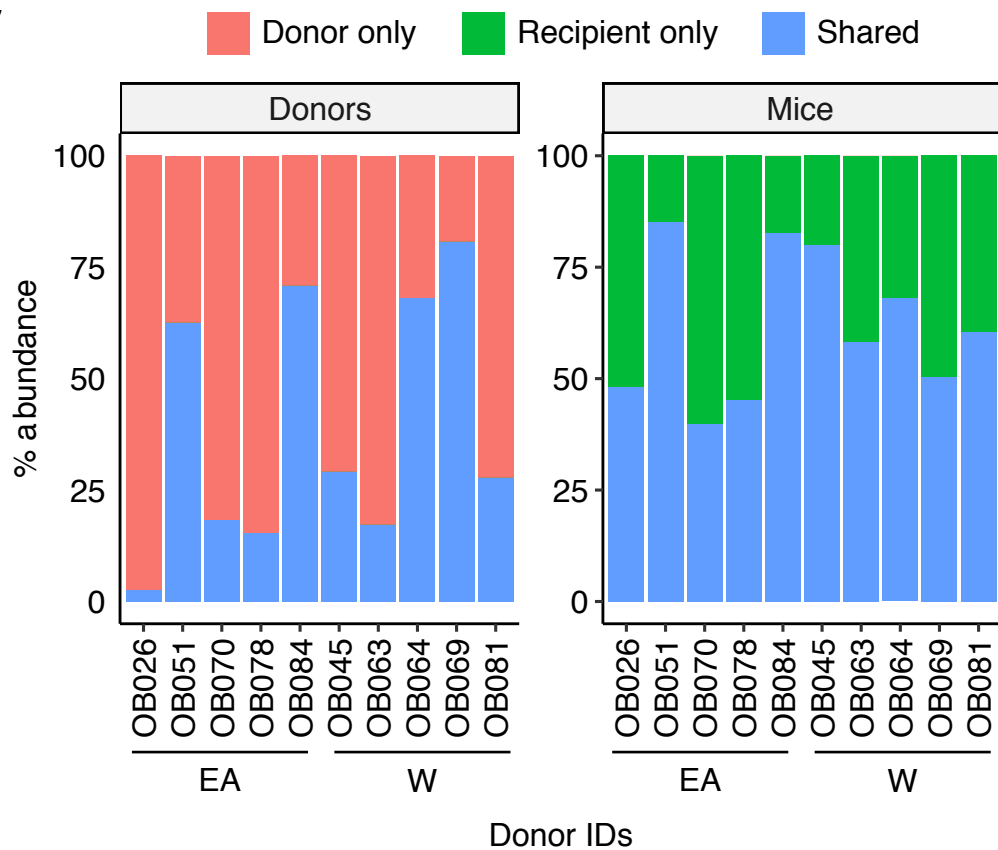

Supplement: supp [file elife-70349-supp-v2.zip › elife_poa_e70349_Figure_7_figure_supplement_2.pdf]

**A**

Donor ethnicity    ● EA    ● W

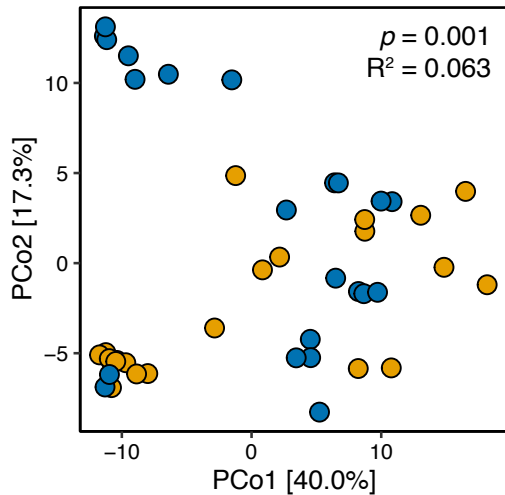**B**

Diet of mice    ● LFPP    ● HFHS

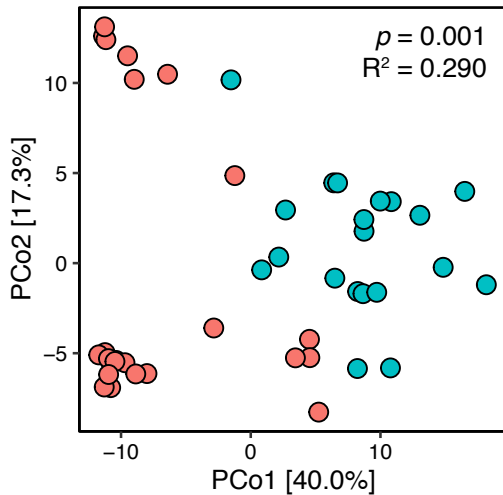

Supplement: supp [file elife-70349-supp-v2.zip › elife_poa_e70349_Figure_7_figure_supplement_3.pdf]
